# Supplementary material for: Rhodomentones A and B, novel meroterpenoids with unique NMR characteristics from Rhodomyrtus tomentosa
Source: Royal Society of Chemistry journal article supplement (doi:10.1039/c6ob01215a), 2016-01-01
Supplement: c6ob01215a1.pdf [file c6ob01215a1.pdf]

Supporting Information

## **Rhomentones A and B, Novel Meroterpenoids with Unique**

### **NMR Characteristics from *Rhodomyrtus tomentosa***

Hong-Xin Liu,<sup>a,b</sup> Kai Chen,<sup>c</sup> Yao Yuan,<sup>a</sup> Zhi-Fang Xu,<sup>a</sup> Hai-Bo Tan<sup>\*a</sup> and Sheng-Xiang Qiu<sup>\*a</sup>

<sup>a</sup>Program for Natural Products Chemical Biology, Key Laboratory of Plant Resources Conservation and Sustainable Utilization, South China Botanical Garden, Chinese Academy of Sciences, Guangzhou 510650, China

<sup>b</sup>State Key Laboratory of Applied Microbiology Southern China, Guangdong Provincial Key Laboratory of Microbial Culture Collection and Application, Guangdong Open Laboratory of Applied Microbiology, Guangdong Institute of Microbiology, Guangzhou 510070, China

<sup>c</sup>School of Chemistry and Chemical Engineering, South China University of Technology, Guangzhou 510640, China

Corresponding author: Phone/Fax: +86-20-37081190

E-mail addresses: tanhaibo@scbg.ac.cn; sxqiu@scbg.ac.cn

## **Contents**

|                                                                                                                 |     |
|-----------------------------------------------------------------------------------------------------------------|-----|
| S1. Computational methods.....                                                                                  | S3  |
| Figure S2. <sup>1</sup> H NMR spectrum (500 MHz, pyridine- <i>d</i> <sub>5</sub> , at 353K) of <b>1</b> .....   | S36 |
| Figure S3. <sup>13</sup> C NMR spectrum (125 MHz, pyridine- <i>d</i> <sub>5</sub> , at 353K) of <b>1</b> .....  | S37 |
| Figure S4. <sup>1</sup> H NMR spectrum (500 MHz, pyridine- <i>d</i> <sub>5</sub> , at 333K) of <b>1</b> .....   | S38 |
| Figure S5. <sup>1</sup> H NMR spectrum (500 MHz, pyridine- <i>d</i> <sub>5</sub> , at 323K) of <b>1</b> .....   | S39 |
| Figure S6. <sup>1</sup> H NMR spectrum (500 MHz, CDCl <sub>3</sub> , rt) of <b>1</b> .....                      | S40 |
| Figure S7. <sup>13</sup> C NMR spectrum (125 MHz, CDCl <sub>3</sub> , rt) of <b>1</b> .....                     | S41 |
| Figure S8. <sup>1</sup> H NMR spectrum (500 MHz, pyridine- <i>d</i> <sub>5</sub> , at 263K) of <b>1</b> .....   | S42 |
| Figure S9. <sup>13</sup> C NMR spectrum (125 MHz, pyridine- <i>d</i> <sub>5</sub> , at 263K) of <b>1</b> .....  | S43 |
| Figure S10. <sup>1</sup> H NMR spectrum (500 MHz, pyridine- <i>d</i> <sub>5</sub> , at 243K) of <b>1</b> .....  | S44 |
| Figure S11. <sup>13</sup> C NMR spectrum (125 MHz, pyridine- <i>d</i> <sub>5</sub> , at 243K) of <b>1</b> ..... | S45 |
| Figure S12. <sup>1</sup> H NMR spectrum (500 MHz, CDCl <sub>3</sub> , at 223K) of <b>1</b> .....                | S46 |

|                                                                                                           |     |
|-----------------------------------------------------------------------------------------------------------|-----|
| Figure S13. $^{13}\text{C}$ NMR spectrum (125 MHz, $\text{CDCl}_3$ , at 223K) of <b>1</b> .....           | S47 |
| Figure S14. HSQC spectrum of <b>1</b> .....                                                               | S48 |
| Figure S15. HRESIMS spectrum of <b>1</b> .....                                                            | S49 |
| Figure S16. UV spectrum of <b>1</b> .....                                                                 | S50 |
| Figure S17. $^1\text{H}$ NMR spectrum (500 MHz, $\text{CDCl}_3$ ) of <b>2</b> .....                       | S51 |
| Figure S18. $^{13}\text{C}$ NMR spectrum (125 MHz, $\text{CDCl}_3$ ) of <b>2</b> .....                    | S52 |
| Figure S19. $^1\text{H}$ - $^1\text{H}$ COSY spectrum (500 MHz, $\text{CDCl}_3$ ) of <b>2</b> .....       | S53 |
| Figure S20. HSQC spectrum of <b>2</b> .....                                                               | S54 |
| Figure S21. HMBC spectrum of <b>2</b> .....                                                               | S55 |
| Figure S22. NOESY spectrum of <b>2</b> .....                                                              | S56 |
| Figure S23. HRESIMS spectrum of <b>2</b> .....                                                            | S57 |
| Figure S24. UV spectrum of <b>2</b> .....                                                                 | S58 |
| Figure S25. $^1\text{H}$ NMR spectrum (500 MHz, $\text{CDCl}_3$ ) of synthetic compound <b>4</b> .....    | S59 |
| Figure S26. $^{13}\text{C}$ NMR spectrum (125 MHz, $\text{CDCl}_3$ ) of synthetic compound <b>4</b> ..... | S60 |
| Figure S27. $^1\text{H}$ NMR spectrum (500 MHz, $\text{CDCl}_3$ ) of key intermediate <b>i</b> .....      | S61 |
| Figure S28. $^{13}\text{C}$ NMR spectrum (125 MHz, $\text{CDCl}_3$ ) of key intermediate <b>i</b> .....   | S62 |
| Figure S29. $^1\text{H}$ NMR spectrum (500 MHz, $\text{CDCl}_3$ ) of synthetic compound <b>1</b> .....    | S63 |
| Figure S30. $^{13}\text{C}$ NMR spectrum (125 MHz, $\text{CDCl}_3$ ) of synthetic compound <b>1</b> ..... | S64 |
| Figure S31. $^1\text{H}$ NMR spectrum (500 MHz, $\text{CDCl}_3$ ) of synthetic compound <b>2</b> .....    | S65 |
| Figure S32. $^{13}\text{C}$ NMR spectrum (125 MHz, $\text{CDCl}_3$ ) of synthetic compound <b>2</b> ..... | S66 |

## S1. Computational methods.

Calculation Methods: Conformational search was performed with the help of TINKER7.1<sup>1</sup> by using OPLS-AA forcefield.<sup>2</sup> To access the global minimum, conformational search is carried out several times using different initial structures. All these structures were checked by python scripts and then optimized at HF/3-21G theoretical level using Gaussian09.<sup>3</sup> Duplicate conformers were removed manually. Structures within 10 kcal/mol (electronic energy) from the most stable conformer at HF/3-21G theoretical level were further optimized at the b3lyp<sup>4</sup>/6-31G(d) theoretical level in gas phase. Then, single point calculations were performed in pyridine using SMD<sup>5</sup> solvent model at b3lyp<sup>4</sup>/6-31G(d) theoretical level, and structures within 3 kcal/mol (electronic energy) from the most stable conformer at SMD(pyridine)-b3lyp/6-31G(d)//b3lyp/6-31G(d) level were selected. Finally, these selected structures were optimized at the SMD(pyridine)<sup>5</sup>-b3lyp<sup>4</sup>/6-31G(d) theoretical level, and frequency calculations were carried out to get the thermal corrections.

For all these optimized structures, dihedral angles of the nine-membered ring were analyzed. These structures could be classified into two clusters, and the most stable conformers of both clusters were selected. The transition structure connecting these two stable structures was successfully located and optimized at the SMD(pyridine)<sup>5</sup>-b3lyp<sup>4</sup>/6-31G(d) theoretical level.

### References:

- 1). Ponder, J. W. *Tinker 7*, Washington University, St. Louis, <http://dasher.wustl.edu/tinker/>
- 2). Kaminski, G. A.; Friesner, R. A.; Tirado-Rives, J.; Jorgensen, W. L. *J. Phys. Chem. B* **2001**, *105*, 6474-6487.
- 3). Frisch, M. J.; Trucks, G. W.; Schlegel, H. B.; Scuseria, G. E.; Robb, M. A.; Cheeseman, J. R.; Scalmani, G.; Barone, V.; Mennucci, B.; Petersson, G. A.; Nakatsuji, H.; Caricato, M.; Li, X.; Hratchian, H. P.; Izmaylov, A. F.; Bloino, J.; Zheng, G.; Sonnenberg, J. L.; Hada, M.; Ehara, M.; Toyota, K.; Fukuda, R.; Hasegawa, J.; Ishida, M.; Nakajima, T.; Honda, Y.; Kitao, O.; Nakai, H.; Vreven, T.; Montgomery Jr., J. A.; Peralta, J. E.; Ogliaro, F.; Bearpark, M. J.; Heyd, J.; Brothers, E. N.; Kudin, K. N.; Staroverov, V. N.; Kobayashi, R.; Normand, J.; Raghavachari, K.; Rendell, A. P.; Burant, J. C.; Iyengar, S. S.; Tomasi, J.; Cossi, M.; Rega, N.; Millam, N. J.; Klene, M.; Knox, J. E.; Cross, J. B.; Bakken, V.; Adamo, C.; Jaramillo, J.; Gomperts, R.; Stratmann, R. E.; Yazyev, O.; Austin, A. J.; Cammi, R.; Pomelli, C.; Ochterski, J. W.; Martin, R. L.; Morokuma, K.; Zakrzewski, V. G.; Voth, G. A.; Salvador, P.; Dannenberg, J. J.; Dapprich, S.; Daniels, A. D.; Farkas, Ö.; Foresman, J. B.; Ortiz, J. V.; Cioslowski, J.; Fox, D. J. *Gaussian 09*, Gaussian, Inc.: Wallingford, CT, USA, 2009.
- 4). a) Becke, A. D. *J. Chem. Phys.* **1993**, *98*, 5648-5652; b) Lee, C.; Yang, W.; Parr, R. G. *Phys. Rev. B* **1988**, *37*, 785-789.
- 5). Marenich, A. V.; Cramer, C. J.; Truhlar, D. G. *J. Phys. Chem. B*, **2009**, *113*, 6378-6396.

# 1. Conformational sampling by scan program of tinker package.

## 1.1 Input xyz file for tinker

-----

79

|    |   |           |           |           |     |    |    |    |    |
|----|---|-----------|-----------|-----------|-----|----|----|----|----|
| 1  | C | -3.660000 | -1.811000 | 0.793000  | 222 | 2  | 6  | 8  |    |
| 2  | C | -2.173000 | -1.935000 | 1.086000  | 84  | 1  | 3  | 11 | 12 |
| 3  | C | -1.355000 | -0.825000 | 0.486000  | 86  | 2  | 4  | 19 |    |
| 4  | C | -1.833000 | 0.209000  | -0.195000 | 86  | 3  | 5  | 13 |    |
| 5  | C | -3.244000 | 0.317000  | -0.539000 | 222 | 4  | 6  | 7  |    |
| 6  | C | -4.161000 | -0.860000 | -0.270000 | 84  | 1  | 5  | 9  | 10 |
| 7  | O | -3.685000 | 1.296000  | -1.123000 | 223 | 5  |    |    |    |
| 8  | O | -4.435000 | -2.532000 | 1.386000  | 223 | 1  |    |    |    |
| 9  | C | -5.569000 | -0.364000 | 0.094000  | 80  | 6  | 33 | 34 | 35 |
| 10 | C | -4.240000 | -1.661000 | -1.604000 | 80  | 6  | 36 | 37 | 38 |
| 11 | C | -1.983000 | -1.908000 | 2.622000  | 80  | 2  | 39 | 40 | 41 |
| 12 | C | -1.687000 | -3.305000 | 0.552000  | 80  | 2  | 42 | 43 | 44 |
| 13 | C | -0.952000 | 1.331000  | -0.689000 | 82  | 4  | 14 | 15 | 45 |
| 14 | C | 0.535000  | 0.891000  | -0.721000 | 81  | 13 | 20 | 46 | 47 |
| 15 | C | -1.216000 | 2.659000  | 0.090000  | 81  | 13 | 16 | 48 | 49 |
| 16 | C | -1.688000 | 3.818000  | -0.814000 | 82  | 15 | 17 | 18 | 50 |
| 17 | C | -2.117000 | 5.016000  | 0.054000  | 80  | 16 | 51 | 52 | 53 |
| 18 | C | -0.583000 | 4.259000  | -1.793000 | 80  | 16 | 54 | 55 | 56 |
| 19 | O | -0.047000 | -1.000000 | 0.769000  | 122 | 3  | 20 |    |    |
| 20 | C | 1.006000  | -0.008000 | 0.444000  | 126 | 14 | 19 | 21 | 28 |
| 21 | C | 1.170000  | 0.706000  | 1.816000  | 81  | 20 | 22 | 57 | 58 |
| 22 | C | 2.091000  | 1.952000  | 1.931000  | 81  | 21 | 23 | 59 | 78 |
| 23 | C | 3.344000  | 1.787000  | 1.114000  | 87  | 22 | 24 | 79 |    |
| 24 | C | 4.372000  | 1.014000  | 1.404000  | 86  | 23 | 25 | 74 |    |
| 25 | C | 5.320000  | 0.627000  | 0.295000  | 81  | 24 | 26 | 63 | 64 |
| 26 | C | 4.797000  | -0.678000 | -0.369000 | 81  | 25 | 27 | 60 | 65 |
| 27 | C | 3.361000  | -0.594000 | -0.922000 | 82  | 26 | 28 | 29 | 61 |
| 28 | C | 2.158000  | -0.973000 | 0.043000  | 82  | 20 | 27 | 30 | 62 |
| 29 | C | 2.956000  | -1.794000 | -1.874000 | 84  | 27 | 30 | 31 | 32 |
| 30 | C | 1.702000  | -2.061000 | -0.988000 | 81  | 28 | 29 | 72 | 73 |
| 31 | C | 3.910000  | -2.992000 | -1.905000 | 80  | 29 | 66 | 67 | 68 |
| 32 | C | 2.636000  | -1.349000 | -3.305000 | 80  | 29 | 69 | 70 | 71 |
| 33 | H | -6.233000 | -1.208000 | 0.213000  | 85  | 9  |    |    |    |
| 34 | H | -5.930000 | 0.286000  | -0.689000 | 85  | 9  |    |    |    |
| 35 | H | -5.554000 | 0.192000  | 1.024000  | 85  | 9  |    |    |    |
| 36 | H | -4.896000 | -2.512000 | -1.473000 | 85  | 10 |    |    |    |
| 37 | H | -4.639000 | -1.011000 | -2.372000 | 85  | 10 |    |    |    |

|    |   |           |           |           |    |    |    |    |    |
|----|---|-----------|-----------|-----------|----|----|----|----|----|
| 38 | H | -3.262000 | -2.008000 | -1.917000 | 85 | 10 |    |    |    |
| 39 | H | -2.589000 | -2.687000 | 3.063000  | 85 | 11 |    |    |    |
| 40 | H | -0.942000 | -2.069000 | 2.859000  | 85 | 11 |    |    |    |
| 41 | H | -2.294000 | -0.953000 | 3.030000  | 85 | 11 |    |    |    |
| 42 | H | -1.781000 | -3.365000 | -0.525000 | 85 | 12 |    |    |    |
| 43 | H | -0.649000 | -3.443000 | 0.818000  | 85 | 12 |    |    |    |
| 44 | H | -2.286000 | -4.086000 | 1.001000  | 85 | 12 |    |    |    |
| 45 | H | -1.240000 | 1.509000  | -1.717000 | 85 | 13 |    |    |    |
| 46 | H | 1.171000  | 1.762000  | -0.764000 | 85 | 14 |    |    |    |
| 47 | H | 0.684000  | 0.338000  | -1.638000 | 85 | 14 |    |    |    |
| 48 | H | -1.975000 | 2.485000  | 0.843000  | 85 | 15 |    |    |    |
| 49 | H | -0.317000 | 2.973000  | 0.602000  | 85 | 15 |    |    |    |
| 50 | H | -2.546000 | 3.459000  | -1.367000 | 85 | 16 |    |    |    |
| 51 | H | -2.462000 | 5.837000  | -0.566000 | 85 | 17 |    |    |    |
| 52 | H | -2.924000 | 4.738000  | 0.724000  | 85 | 17 |    |    |    |
| 53 | H | -1.282000 | 5.372000  | 0.651000  | 85 | 17 |    |    |    |
| 54 | H | -0.266000 | 3.446000  | -2.436000 | 85 | 18 |    |    |    |
| 55 | H | -0.937000 | 5.064000  | -2.430000 | 85 | 18 |    |    |    |
| 56 | H | 0.283000  | 4.620000  | -1.245000 | 85 | 18 |    |    |    |
| 57 | H | 0.176000  | 0.988000  | 2.139000  | 85 | 21 |    |    |    |
| 58 | H | 1.515000  | -0.056000 | 2.503000  | 85 | 21 |    |    |    |
| 59 | H | 2.318000  | 2.107000  | 2.981000  | 85 | 22 |    |    |    |
| 60 | H | 4.863000  | -1.491000 | 0.345000  | 85 | 26 |    |    |    |
| 61 | H | 3.210000  | 0.353000  | -1.422000 | 85 | 27 |    |    |    |
| 62 | H | 2.524000  | -1.435000 | 0.949000  | 85 | 28 |    |    |    |
| 63 | H | 5.367000  | 1.409000  | -0.456000 | 85 | 25 |    |    |    |
| 64 | H | 6.325000  | 0.460000  | 0.668000  | 85 | 25 |    |    |    |
| 65 | H | 5.463000  | -0.923000 | -1.189000 | 85 | 26 |    |    |    |
| 66 | H | 4.829000  | -2.757000 | -2.430000 | 85 | 31 |    |    |    |
| 67 | H | 4.162000  | -3.332000 | -0.908000 | 85 | 31 |    |    |    |
| 68 | H | 3.429000  | -3.815000 | -2.426000 | 85 | 31 |    |    |    |
| 69 | H | 3.539000  | -1.022000 | -3.812000 | 85 | 32 |    |    |    |
| 70 | H | 2.206000  | -2.169000 | -3.872000 | 85 | 32 |    |    |    |
| 71 | H | 1.930000  | -0.527000 | -3.312000 | 85 | 32 |    |    |    |
| 72 | H | 1.648000  | -3.059000 | -0.575000 | 85 | 30 |    |    |    |
| 73 | H | 0.769000  | -1.837000 | -1.481000 | 85 | 30 |    |    |    |
| 74 | C | 4.604000  | 0.323000  | 2.730000  | 80 | 24 | 75 | 76 | 77 |
| 75 | H | 5.585000  | 0.599000  | 3.108000  | 85 | 74 |    |    |    |
| 76 | H | 3.870000  | 0.597000  | 3.475000  | 85 | 74 |    |    |    |
| 77 | H | 4.590000  | -0.756000 | 2.618000  | 85 | 74 |    |    |    |
| 78 | H | 1.561000  | 2.834000  | 1.607000  | 85 | 22 |    |    |    |
| 79 | H | 3.324000  | 2.238000  | 0.138000  | 89 | 23 |    |    |    |

---

## 1.2 Input parameters for tinker

scan input.xyz

-----  
*oplsaa.prm*

2

25 24 23 22

74 24 23 22

74 24 23 79

25 24 23 79

5

50.0

0.1  
-----

1.2 Python scripts used to distinguish the structures.

Python2.7 script to calculate the dihedral angles and chiral properties (R or S of each chiral center)

-----  
*Ring\_List = [ [20,21,22,23,24,25,26,27,28], [1,2,3,4,5,6], [3,4,13,14,20,19] ]*

*Torsion\_List = [ (4,13,15,16), (13,15,16,17) ]*

*Chir\_List = [ (4,14,13,15), (20,27,28,30), (26,28,27,29),(14,19,20,28) ]*

*import math*

*class Vec :* *# general class for vector calculations*

*def \_\_init\_\_(self, x, y, z) :*

*self.x = x ; self.y = y ; self.z = z*

*def Add(self, other) :*

*return Vec( self.x + other.x , self.y + other.y , self.z + other.z )*

*def Delta(self, other) :*

*return Vec( other.x - self.x , other.y - self.y , other.z - self.z )*

*def Scalar(self, k) :*

*return Vec( self.x \* k , self.y \* k , self.z \* k )*

*def Norm(self) :*

*temp = self.x \* self.x + self.y \* self.y + self.z \* self.z*

*return math.sqrt( temp )*

*def Dot(self, other) :*

*return ( self.x \* other.x + self.y \* other.y + self.z \* other.z )*

*def Cross(self, other) :*

*x = self.y \* other.z - self.z \* other.y*

*y = self.z \* other.x - self.x \* other.z*

*z = self.x \* other.y - self.y \* other.x*

```

return Vec( x, y, z )

def Dihed( A1, A2, A3, A4 ) :
    r_12 = A1.Delta( A2 )
    r_23 = A2.Delta( A3 )
    r_34 = A3.Delta( A4 )
    r_123 = r_12.Cross( r_23 )
    r_234 = r_23.Cross( r_34 )
    cosPhi = r_123.Dot( r_234 ) / r_123.Norm() / r_234.Norm()
    Phi = math.acos( cosPhi * 0.999999999 ) * 180.0 / math.pi
    if r_12.Dot( r_234 ) < 0.0 : Phi = - Phi
    return Phi

def Chir( A1, A2, C1, A4 ) :
    r_12 = A1.Delta( A2 )
    r_23 = A2.Delta( C1 )
    r_34 = C1.Delta( A4 )
    r_123 = r_12.Cross( r_23 )
    r_234 = r_23.Cross( r_34 )
    cosChir = r_123.Dot( r_234 ) / r_123.Norm() / r_234.Norm()
    Chir = math.acos( cosChir * 0.999999999 ) * 180.0 / math.pi
    if r_12.Dot( r_234 ) < 0.0 : Chir = - Chir
    if Chir > 0:
        return 1;
    else:
        return 0;

def Torsion_Ring( A_list ):
    Dih_Ring = []
    Index_End = len( A_list ) - 1
    for i in range( len( A_list ) ):
        if i+1 > Index_End:
            Dih_Ring.append( Dihed( A_list[i-1], A_list[i],
A_list[i+1-len(A_list)], A_list[i+2-len(A_list)] ) );
        elif i+2 > Index_End:
            Dih_Ring.append( Dihed( A_list[i-1], A_list[i],
A_list[i+1], A_list[i+2-len(A_list)] ) );
        else:
            Dih_Ring.append( Dihed( A_list[i-1], A_list[i], A_list[i+1], A_list[i+2] ) );
    return Dih_Ring;

def Print( L ) :
    for each in L :

```

```

        print '%5.0f' %each,
#print

def Calc( fname ) :
    ifile = file( fname, 'r' )
    read = False
    Atoms = [ '*' ]
    for line in ifile :
        words = line.split()

        if read and len(words) != 4 :
            break
        if read :
            Atoms.append( Vec( float(words[1]), float(words[2]), float(words[3]) ) )

        elif line[0] == '0' :
            read = True

    ifile.close()

    tor_chir = [ ]

    A_list = [ ]
    for RL_i in range( len( Ring_List ) ) :
        A_list.append( [ ] );
        for RL_j in Ring_List[ RL_i ] :
            A_list[RL_i].append( Atoms[ RL_j ] )
            tor_chir += Torsion_Ring( A_list[RL_i] )

    for TL_i in range( len(Torsion_List) ) :
        tor_chir.append( Dihed(Atoms[Torsion_List[TL_i][0]], Atoms[Torsion_List[TL_i][1]],
Atoms[Torsion_List[TL_i][2]], Atoms[Torsion_List[TL_i][3]))

    for CL_i in range( len( Chir_List ) ) :
        tor_chir.append( Chir( Atoms[Chir_List[CL_i][0]], Atoms[Chir_List[CL_i][1]],
Atoms[Chir_List[CL_i][2]], Atoms[Chir_List[CL_i][3]]));

    Print( tor_chir );

from glob import glob
Files = glob( '*.gjf' )
Files.sort()

```



```

print 'filename ',
for RL_i in range( len( Ring_List ) ):
    for RL_j in range( len( Ring_List[ RL_i ] ) ):
        if RL_j < len( Ring_List[ RL_i ] )-1:
            print '(' +str(Ring_List[ RL_i ][RL_j]) + ',' + str(Ring_List[ RL_i ][RL_j+1])+')',
        elif RL_j == len( Ring_List[ RL_i ] )-1:
            print '(' +str(Ring_List[ RL_i ][RL_j]) + ',' + str(Ring_List[ RL_i ][0])+')',

for TL_i in range( len(Torsion_List) ):
    print '(' +str(Torsion_List[TL_i][0]) + ',' + str(Torsion_List[TL_i][1]) + ',' + str(Torsion_List[TL_i][2])
+ ',' + str(Torsion_List[TL_i][3])+')',

for CL_i in range( len( Chir_List ) ) :
    print '(' +str(Chir_List[CL_i][0]) + ',' + str(Chir_List[CL_i][1]) + ',' + str(Chir_List[CL_i][2]) + ',' +
str(Chir_List[CL_i][3])+')',
print

for fname in Files :
    print fname[:-4],
    Calc( fname )
    print

```

---

## Python2.7 script to find duplicate conformers

---

```

import sys
import math

Name_list = [ ]

ifile = file('dihed.txt', 'r')
lines = ifile.readlines()
ifile.close()

ofile=file('duplicate_name.txt','w')
duplicate = [ ]

for i in range(1,len(lines)):
    iwords = lines[i].split()
    v_ = 0
    v_list = [ ]

```

```

index = []
if len(iwords) > 0:
    for j in range(1,i):
        jwords = lines[j].split()
        v_ = 0
        for k in range(1,len(jwords)):
            #print jwords[k+4],
            v_ += (float(jwords[k])-float(iwords[k]))**2
        if v_ < 50:
            v_list.append(v_)
            add_name = jwords[0]+'log'
            index.append(jwords[0])
            if add_name not in duplicate:
                duplicate.append( add_name );
if len(v_list):
    print iwords[0],index, v_list

for each in duplicate:
    ofile.write( each + '\n');
ofile.close()

```

---

2. Electronic energies after optimized at HF/3-21G theoretical level in gas phase.

**Table S1.** Electronic energies at HF/3-21G theoretical level.

| Conformers | E <sub>ele</sub> (Hartree) | E <sub>ele</sub> (kcal/mol) |
|------------|----------------------------|-----------------------------|
| RB_15      | -1379.70522                | 0.0                         |
| RB_6       | -1379.70522                | 0.0                         |
| RB_14      | -1379.70512                | 0.1                         |
| RB_7       | -1379.70512                | 0.1                         |
| RB_10      | -1379.70410                | 0.7                         |
| RB_2       | -1379.70410                | 0.7                         |
| RB_5       | -1379.70391                | 0.8                         |
| RB_3       | -1379.70391                | 0.8                         |
| RB_17      | -1379.70372                | 0.9                         |
| RB_25      | -1379.70372                | 0.9                         |
| RB_12      | -1379.70310                | 1.3                         |
| RB_41      | -1379.70310                | 1.3                         |
| RB_46      | -1379.70299                | 1.4                         |
| RB_43      | -1379.70256                | 1.7                         |
| RB_8       | -1379.70218                | 1.9                         |
| RB_35      | -1379.70218                | 1.9                         |
| RB_20      | -1379.70218                | 1.9                         |

|        |             |     |
|--------|-------------|-----|
| RB_1   | -1379.70218 | 1.9 |
| RB_40  | -1379.70216 | 1.9 |
| RB_19  | -1379.70216 | 1.9 |
| RB_11  | -1379.70209 | 2.0 |
| RB_18  | -1379.70194 | 2.1 |
| RB_13  | -1379.70189 | 2.1 |
| RB_24  | -1379.70075 | 2.8 |
| RB_57  | -1379.70075 | 2.8 |
| RB_4   | -1379.70075 | 2.8 |
| RB_32  | -1379.70075 | 2.8 |
| RB_22  | -1379.70009 | 3.2 |
| RB_9   | -1379.70009 | 3.2 |
| RB_42  | -1379.70002 | 3.3 |
| RB_64  | -1379.70002 | 3.3 |
| RB_50  | -1379.70002 | 3.3 |
| RB_23  | -1379.69988 | 3.4 |
| RB_27  | -1379.69977 | 3.4 |
| RB_30  | -1379.69975 | 3.4 |
| RB_48  | -1379.69934 | 3.7 |
| RB_56  | -1379.69923 | 3.8 |
| RB_53  | -1379.69923 | 3.8 |
| RB_52  | -1379.69923 | 3.8 |
| RB_31  | -1379.69923 | 3.8 |
| RB_26  | -1379.69853 | 4.2 |
| RB_34  | -1379.69853 | 4.2 |
| RB_49  | -1379.69800 | 4.5 |
| RB_47  | -1379.69800 | 4.5 |
| RB_16  | -1379.69792 | 4.6 |
| RB_60  | -1379.69792 | 4.6 |
| RB_38  | -1379.69792 | 4.6 |
| RB_28  | -1379.69792 | 4.6 |
| RB_21  | -1379.69759 | 4.8 |
| RB_37  | -1379.69759 | 4.8 |
| RB_77  | -1379.69759 | 4.8 |
| RB_155 | -1379.69744 | 4.9 |
| RB_109 | -1379.69744 | 4.9 |
| RB_108 | -1379.69744 | 4.9 |
| RB_66  | -1379.69744 | 4.9 |
| RB_121 | -1379.69744 | 4.9 |
| RB_58  | -1379.69733 | 5.0 |
| RB_45  | -1379.69717 | 5.1 |
| RB_79  | -1379.69681 | 5.3 |
| RB_97  | -1379.69681 | 5.3 |
| RB_112 | -1379.69681 | 5.3 |

|        |             |     |
|--------|-------------|-----|
| RB_69  | -1379.69677 | 5.3 |
| RB_33  | -1379.69677 | 5.3 |
| RB_76  | -1379.69630 | 5.6 |
| RB_93  | -1379.69590 | 5.9 |
| RB_184 | -1379.69590 | 5.9 |
| RB_100 | -1379.69584 | 5.9 |
| RB_51  | -1379.69584 | 5.9 |
| RB_124 | -1379.69584 | 5.9 |
| RB_131 | -1379.69564 | 6.0 |
| RB_157 | -1379.69564 | 6.0 |
| RB_78  | -1379.69564 | 6.0 |
| RB_63  | -1379.69546 | 6.1 |
| RB_82  | -1379.69539 | 6.2 |
| RB_36  | -1379.69492 | 6.5 |
| RB_70  | -1379.69469 | 6.6 |
| RB_116 | -1379.69467 | 6.6 |
| RB_130 | -1379.69467 | 6.6 |
| RB_71  | -1379.69467 | 6.6 |
| RB_102 | -1379.69449 | 6.7 |
| RB_67  | -1379.69448 | 6.7 |
| RB_132 | -1379.69448 | 6.7 |
| RB_99  | -1379.69448 | 6.7 |
| RB_96  | -1379.69448 | 6.7 |
| RB_68  | -1379.69448 | 6.7 |
| RB_101 | -1379.69440 | 6.8 |
| RB_75  | -1379.69440 | 6.8 |
| RB_59  | -1379.69437 | 6.8 |
| RB_55  | -1379.69429 | 6.9 |
| RB_80  | -1379.69420 | 6.9 |
| RB_85  | -1379.69420 | 6.9 |
| RB_143 | -1379.69419 | 6.9 |
| RB_174 | -1379.69418 | 6.9 |
| RB_126 | -1379.69418 | 6.9 |
| RB_138 | -1379.69418 | 6.9 |
| RB_73  | -1379.69413 | 7.0 |
| RB_88  | -1379.69410 | 7.0 |
| RB_144 | -1379.69410 | 7.0 |
| RB_147 | -1379.69410 | 7.0 |
| RB_142 | -1379.69410 | 7.0 |
| RB_165 | -1379.69410 | 7.0 |
| RB_164 | -1379.69410 | 7.0 |
| RB_62  | -1379.69398 | 7.1 |
| RB_65  | -1379.69398 | 7.1 |
| RB_196 | -1379.69398 | 7.1 |

|        |             |     |
|--------|-------------|-----|
| RB_86  | -1379.69376 | 7.2 |
| RB_104 | -1379.69360 | 7.3 |
| RB_163 | -1379.69360 | 7.3 |
| RB_92  | -1379.69360 | 7.3 |
| RB_137 | -1379.69360 | 7.3 |
| RB_186 | -1379.69360 | 7.3 |
| RB_44  | -1379.69352 | 7.3 |
| RB_54  | -1379.69352 | 7.3 |
| RB_159 | -1379.69341 | 7.4 |
| RB_152 | -1379.69341 | 7.4 |
| RB_120 | -1379.69341 | 7.4 |
| RB_83  | -1379.69341 | 7.4 |
| RB_113 | -1379.69341 | 7.4 |
| RB_156 | -1379.69341 | 7.4 |
| RB_181 | -1379.69341 | 7.4 |
| RB_61  | -1379.69316 | 7.6 |
| RB_183 | -1379.69291 | 7.7 |
| RB_107 | -1379.69291 | 7.7 |
| RB_91  | -1379.69285 | 7.8 |
| RB_94  | -1379.69285 | 7.8 |
| RB_115 | -1379.69275 | 7.8 |
| RB_81  | -1379.69263 | 7.9 |
| RB_29  | -1379.69262 | 7.9 |
| RB_118 | -1379.69262 | 7.9 |
| RB_119 | -1379.69262 | 7.9 |
| RB_160 | -1379.69262 | 7.9 |
| RB_197 | -1379.69262 | 7.9 |
| RB_169 | -1379.69232 | 8.1 |
| RB_89  | -1379.69232 | 8.1 |
| RB_167 | -1379.69230 | 8.1 |
| RB_162 | -1379.69230 | 8.1 |
| RB_170 | -1379.69230 | 8.1 |
| RB_185 | -1379.69230 | 8.1 |
| RB_114 | -1379.69230 | 8.1 |
| RB_127 | -1379.69230 | 8.1 |
| RB_72  | -1379.69215 | 8.2 |
| RB_74  | -1379.69215 | 8.2 |
| RB_84  | -1379.69215 | 8.2 |
| RB_39  | -1379.69215 | 8.2 |
| RB_106 | -1379.69201 | 8.3 |
| RB_117 | -1379.69195 | 8.3 |
| RB_139 | -1379.69195 | 8.3 |
| RB_153 | -1379.69195 | 8.3 |
| RB_133 | -1379.69195 | 8.3 |

|        |             |      |
|--------|-------------|------|
| RB_166 | -1379.69190 | 8.4  |
| RB_87  | -1379.69184 | 8.4  |
| RB_122 | -1379.69184 | 8.4  |
| RB_141 | -1379.69151 | 8.6  |
| RB_179 | -1379.69140 | 8.7  |
| RB_95  | -1379.69124 | 8.8  |
| RB_98  | -1379.69124 | 8.8  |
| RB_136 | -1379.69115 | 8.8  |
| RB_125 | -1379.69115 | 8.8  |
| RB_148 | -1379.69100 | 8.9  |
| RB_103 | -1379.69037 | 9.3  |
| RB_172 | -1379.69016 | 9.5  |
| RB_198 | -1379.69016 | 9.5  |
| RB_176 | -1379.69016 | 9.5  |
| RB_135 | -1379.69001 | 9.6  |
| RB_111 | -1379.68988 | 9.6  |
| RB_123 | -1379.68987 | 9.6  |
| RB_171 | -1379.68987 | 9.6  |
| RB_191 | -1379.68987 | 9.6  |
| RB_145 | -1379.68985 | 9.7  |
| RB_150 | -1379.68985 | 9.7  |
| RB_90  | -1379.68935 | 10.0 |
| RB_105 | -1379.68929 | 10.0 |
| RB_129 | -1379.68929 | 10.0 |
| RB_161 | -1379.68918 | 10.1 |
| RB_194 | -1379.68918 | 10.1 |
| RB_134 | -1379.68918 | 10.1 |
| RB_128 | -1379.68918 | 10.1 |
| RB_192 | -1379.68918 | 10.1 |
| RB_154 | -1379.68894 | 10.2 |
| RB_190 | -1379.68894 | 10.2 |
| RB_193 | -1379.68872 | 10.4 |
| RB_180 | -1379.68872 | 10.4 |
| RB_189 | -1379.68854 | 10.5 |
| RB_199 | -1379.68847 | 10.5 |
| RB_178 | -1379.68847 | 10.5 |
| RB_151 | -1379.68841 | 10.6 |
| RB_175 | -1379.68841 | 10.6 |
| RB_149 | -1379.68807 | 10.8 |
| RB_177 | -1379.68799 | 10.8 |
| RB_195 | -1379.68799 | 10.8 |
| RB_187 | -1379.68798 | 10.8 |
| RB_146 | -1379.68796 | 10.8 |
| RB_158 | -1379.68781 | 10.9 |

|        |             |      |
|--------|-------------|------|
| RB_140 | -1379.68781 | 10.9 |
| RB_173 | -1379.68736 | 11.2 |
| RB_168 | -1379.68735 | 11.2 |
| RB_110 | -1379.68667 | 11.6 |
| RB_188 | -1379.68639 | 11.8 |
| RB_182 | -1379.65929 | 28.8 |

3. Electronic Energies after optimization at b3lyp/6-31G(d) theoretical level.

After removing the duplicate conformers, structures within 10 kcal/mol from the most stable conformer at HF/3-21G theoretical level were further optimized at a higher theoretical level, b3lyp/6-31G(d).

**Table S2.** Electronic energies at b3lyp/6-31G(d) theoretical level

| Conformers | Eele(Hartree) | Eele(kcal/mol) |
|------------|---------------|----------------|
| RB_2       | -1396.53440   | 0.0            |
| RB_6       | -1396.53425   | 0.1            |
| RB_5       | -1396.53398   | 0.3            |
| RB_7       | -1396.53388   | 0.3            |
| RB_8       | -1396.53253   | 1.2            |
| RB_46      | -1396.53249   | 1.2            |
| RB_25      | -1396.53249   | 1.2            |
| RB_13      | -1396.53239   | 1.3            |
| RB_11      | -1396.53236   | 1.3            |
| RB_41      | -1396.53224   | 1.4            |
| RB_43      | -1396.53211   | 1.4            |
| RB_40      | -1396.53158   | 1.8            |
| RB_35      | -1396.53140   | 1.9            |
| RB_57      | -1396.53119   | 2.0            |
| RB_9       | -1396.53101   | 2.1            |
| RB_23      | -1396.52999   | 2.8            |
| RB_31      | -1396.52981   | 2.9            |
| RB_56      | -1396.52981   | 2.9            |
| RB_64      | -1396.52968   | 3.0            |
| RB_34      | -1396.52947   | 3.1            |
| RB_49      | -1396.52938   | 3.2            |
| RB_27      | -1396.52935   | 3.2            |
| RB_48      | -1396.52935   | 3.2            |
| RB_30      | -1396.52916   | 3.3            |
| RB_60      | -1396.52907   | 3.3            |
| RB_77      | -1396.52860   | 3.6            |
| RB_69      | -1396.52811   | 3.9            |
| RB_58      | -1396.52790   | 4.1            |
| RB_97      | -1396.52778   | 4.2            |

|        |             |     |
|--------|-------------|-----|
| RB_63  | -1396.52756 | 4.3 |
| RB_76  | -1396.52733 | 4.4 |
| RB_66  | -1396.52714 | 4.6 |
| RB_59  | -1396.52712 | 4.6 |
| RB_51  | -1396.52697 | 4.7 |
| RB_78  | -1396.52657 | 4.9 |
| RB_65  | -1396.52657 | 4.9 |
| RB_36  | -1396.52634 | 5.1 |
| RB_45  | -1396.52633 | 5.1 |
| RB_71  | -1396.52617 | 5.2 |
| RB_85  | -1396.52614 | 5.2 |
| RB_159 | -1396.52600 | 5.3 |
| RB_55  | -1396.52588 | 5.4 |
| RB_75  | -1396.52586 | 5.4 |
| RB_82  | -1396.52571 | 5.5 |
| RB_99  | -1396.52558 | 5.5 |
| RB_143 | -1396.52554 | 5.6 |
| RB_70  | -1396.52548 | 5.6 |
| RB_61  | -1396.52547 | 5.6 |
| RB_73  | -1396.52544 | 5.6 |
| RB_88  | -1396.52539 | 5.7 |
| RB_81  | -1396.52538 | 5.7 |
| RB_84  | -1396.52521 | 5.8 |
| RB_29  | -1396.52514 | 5.8 |
| RB_93  | -1396.52500 | 5.9 |
| RB_86  | -1396.52497 | 5.9 |
| RB_54  | -1396.52489 | 6.0 |
| RB_94  | -1396.52479 | 6.0 |
| RB_83  | -1396.52448 | 6.2 |
| RB_92  | -1396.52443 | 6.3 |
| RB_174 | -1396.52433 | 6.3 |
| RB_102 | -1396.52398 | 6.5 |
| RB_103 | -1396.52389 | 6.6 |
| RB_115 | -1396.52386 | 6.6 |
| RB_183 | -1396.52385 | 6.6 |
| RB_87  | -1396.52370 | 6.7 |
| RB_150 | -1396.52339 | 6.9 |
| RB_185 | -1396.52334 | 6.9 |
| RB_98  | -1396.52322 | 7.0 |
| RB_106 | -1396.52317 | 7.1 |
| RB_141 | -1396.52275 | 7.3 |
| RB_153 | -1396.52273 | 7.3 |
| RB_197 | -1396.52251 | 7.5 |
| RB_136 | -1396.52234 | 7.6 |



|        |             |     |
|--------|-------------|-----|
| RB_166 | -1396.52223 | 7.6 |
| RB_148 | -1396.52210 | 7.7 |
| RB_89  | -1396.52191 | 7.8 |
| RB_179 | -1396.52176 | 7.9 |
| RB_191 | -1396.52162 | 8.0 |
| RB_111 | -1396.52123 | 8.3 |
| RB_90  | -1396.52106 | 8.4 |
| RB_135 | -1396.52102 | 8.4 |
| RB_198 | -1396.52097 | 8.4 |
| RB_18  | -1396.51909 | 9.6 |

4. Electronic Energies at SMD(pyridine)-b3lyp/6-31G(d)//b3lyp/6-31G(d) theoretical level.

Single point calculations were performed in pyridine using SMD solvent model after optimization in gas phase at b3lyp/6-31G(d) theoretical level.

Conformers RB\_25, RB\_27, RB\_31, RB\_61, and RB\_81 are duplicate structures of other structures, and are removed from the conformer space.

**Table S3.** Electronic energies at SMD(pyridine)-b3lyp/6-31G(d)//b3lyp/6-31G(d) theoretical level.

| Conformers | $E_{\text{elec}}$ (Hartree) | $E_{\text{elec}}$ (kcal/mol) |
|------------|-----------------------------|------------------------------|
| RB_6       | -1396.57386                 | 0.0                          |
| RB_2       | -1396.57374                 | 0.1                          |
| RB_7       | -1396.57326                 | 0.4                          |
| RB_5       | -1396.57317                 | 0.4                          |
| RB_11      | -1396.57148                 | 1.5                          |
| RB_40      | -1396.57133                 | 1.6                          |
| RB_46      | -1396.57117                 | 1.7                          |
| RB_35      | -1396.57093                 | 1.8                          |
| RB_8       | -1396.57080                 | 1.9                          |
| RB_41      | -1396.57075                 | 2.0                          |
| RB_13      | -1396.57062                 | 2.0                          |
| RB_43      | -1396.57061                 | 2.0                          |
| RB_57      | -1396.57007                 | 2.4                          |
| RB_9       | -1396.56976                 | 2.6                          |
| RB_23      | -1396.56951                 | 2.7                          |
| RB_56      | -1396.56940                 | 2.8                          |
| RB_64      | -1396.56892                 | 3.1                          |
| RB_34      | -1396.56780                 | 3.8                          |
| RB_69      | -1396.56777                 | 3.8                          |
| RB_48      | -1396.56764                 | 3.9                          |
| RB_49      | -1396.56763                 | 3.9                          |
| RB_60      | -1396.56734                 | 4.1                          |
| RB_30      | -1396.56726                 | 4.1                          |

|        |             |     |
|--------|-------------|-----|
| RB_58  | -1396.56693 | 4.4 |
| RB_97  | -1396.56679 | 4.4 |
| RB_77  | -1396.56676 | 4.5 |
| RB_78  | -1396.56628 | 4.8 |
| RB_65  | -1396.56596 | 5.0 |
| RB_66  | -1396.56577 | 5.1 |
| RB_63  | -1396.56575 | 5.1 |
| RB_71  | -1396.56572 | 5.1 |
| RB_76  | -1396.56549 | 5.3 |
| RB_51  | -1396.56530 | 5.4 |
| RB_99  | -1396.56529 | 5.4 |
| RB_45  | -1396.56528 | 5.4 |
| RB_75  | -1396.56522 | 5.4 |
| RB_59  | -1396.56519 | 5.4 |
| RB_82  | -1396.56457 | 5.8 |
| RB_86  | -1396.56448 | 5.9 |
| RB_55  | -1396.56434 | 6.0 |
| RB_54  | -1396.56425 | 6.0 |
| RB_83  | -1396.56416 | 6.1 |
| RB_84  | -1396.56412 | 6.1 |
| RB_93  | -1396.56412 | 6.1 |
| RB_29  | -1396.56410 | 6.1 |
| RB_94  | -1396.56407 | 6.1 |
| RB_143 | -1396.56402 | 6.2 |
| RB_159 | -1396.56398 | 6.2 |
| RB_73  | -1396.56394 | 6.2 |
| RB_92  | -1396.56391 | 6.3 |
| RB_36  | -1396.56385 | 6.3 |
| RB_88  | -1396.56378 | 6.3 |
| RB_70  | -1396.56368 | 6.4 |
| RB_103 | -1396.56354 | 6.5 |
| RB_85  | -1396.56352 | 6.5 |
| RB_183 | -1396.56338 | 6.6 |
| RB_115 | -1396.56295 | 6.8 |
| RB_174 | -1396.56283 | 6.9 |
| RB_150 | -1396.56278 | 7.0 |
| RB_185 | -1396.56272 | 7.0 |
| RB_102 | -1396.56240 | 7.2 |
| RB_98  | -1396.56225 | 7.3 |
| RB_87  | -1396.56194 | 7.5 |
| RB_141 | -1396.56189 | 7.5 |
| RB_106 | -1396.56178 | 7.6 |
| RB_153 | -1396.56119 | 8.0 |
| RB_197 | -1396.56098 | 8.1 |

|        |             |     |
|--------|-------------|-----|
| RB_148 | -1396.56072 | 8.2 |
| RB_135 | -1396.56051 | 8.4 |
| RB_198 | -1396.56046 | 8.4 |
| RB_136 | -1396.56041 | 8.4 |
| RB_179 | -1396.56038 | 8.5 |
| RB_89  | -1396.56026 | 8.5 |
| RB_166 | -1396.56003 | 8.7 |
| RB_191 | -1396.56003 | 8.7 |
| RB_90  | -1396.55978 | 8.8 |
| RB_18  | -1396.55944 | 9.1 |
| RB_111 | -1396.55908 | 9.3 |

### 5. Optimization at SMD(pyridine)-b3lyp/6-31G(d) theoretical level.

Structures within 3 kcal/mol at SMD(pyridine)-b3lyp/6-31G(d)/b3lyp/6-31G(d) theoretical level were chosen, then were further optimization at SMD(pyridine)-b3lyp/6-31G(d) theoretical level. Frequency calculations were carried out at the same theoretical level, SMD(pyridine)-b3lyp/6-31G(d), to get thermal correction.

**Table S4.** Electronic energies and thermal properties after optimized at SMD(pyridine)-b3lyp/6-31G(d) theoretical level and frequency calculations at the same level.

| Conformers | E <sub>ele</sub> | E <sub>0</sub> | E           | H           | G           | ΔG(kcal/mol) |
|------------|------------------|----------------|-------------|-------------|-------------|--------------|
| RB_5       | -1396.57425      | -1395.87242    | -1395.83753 | -1395.83659 | -1395.93651 | 0.0          |
| RB_2       | -1396.57472      | -1395.87275    | -1395.83785 | -1395.83690 | -1395.93649 | 0.0          |
| RB_6       | -1396.57479      | -1395.87265    | -1395.83780 | -1395.83686 | -1395.93627 | 0.2          |
| RB_7       | -1396.57429      | -1395.87227    | -1395.83734 | -1395.83639 | -1395.93625 | 0.2          |
| RB_11      | -1396.57248      | -1395.87100    | -1395.83596 | -1395.83501 | -1395.93487 | 1.0          |
| RB_46      | -1396.57241      | -1395.87049    | -1395.83555 | -1395.83460 | -1395.93465 | 1.2          |
| RB_43      | -1396.57178      | -1395.87007    | -1395.83504 | -1395.83410 | -1395.93457 | 1.2          |
| RB_8       | -1396.57192      | -1395.87028    | -1395.83531 | -1395.83436 | -1395.93431 | 1.4          |
| RB_35      | -1396.57211      | -1395.87008    | -1395.83517 | -1395.83423 | -1395.93390 | 1.6          |
| RB_57      | -1396.57101      | -1395.86974    | -1395.83470 | -1395.83376 | -1395.93346 | 1.9          |
| RB_40      | -1396.57231      | -1395.87020    | -1395.83540 | -1395.83446 | -1395.93331 | 2.0          |
| RB_13      | -1396.57175      | -1395.86978    | -1395.83498 | -1395.83404 | -1395.93331 | 2.0          |
| RB_9       | -1396.57081      | -1395.86940    | -1395.83439 | -1395.83345 | -1395.93322 | 2.1          |
| RB_23      | -1396.57066      | -1395.86895    | -1395.83388 | -1395.83294 | -1395.93266 | 2.4          |
| RB_56      | -1396.57053      | -1395.86886    | -1395.83382 | -1395.83287 | -1395.93234 | 2.6          |

**Table S5.** Dihedral angles in the nine-membered ring of conformers located after optimization at SMD(pyridine)-b3lyp/6-31G(d) level.

| Conformers  | ΔG<br>(kcal/mol) | Dihedral Angles |            |            |             |           |           |            |            |            |
|-------------|------------------|-----------------|------------|------------|-------------|-----------|-----------|------------|------------|------------|
|             |                  | 9-8-7-6         | 8-7-6-5    | 7-6-5-4    | 6-5-4-3     | 5-4-3-2   | 4-3-2-1   | 3-2-1-9    | 2-1-9-8    | 1-9-8-7    |
| <b>RB_5</b> | <b>0.0</b>       | <b>79</b>       | <b>-52</b> | <b>118</b> | <b>-158</b> | <b>34</b> | <b>50</b> | <b>-99</b> | <b>101</b> | <b>-99</b> |

|             |     |    |     |            |      |            |    |     |     |      |
|-------------|-----|----|-----|------------|------|------------|----|-----|-----|------|
| RB_2        | 0.0 | 78 | -51 | <b>119</b> | -158 | <b>34</b>  | 51 | -99 | 101 | -99  |
| <b>RB_6</b> | 0.2 | 84 | -45 | <b>-72</b> | 157  | <b>-87</b> | 58 | -89 | 114 | -94  |
| RB_7        | 0.2 | 85 | -45 | <b>-74</b> | 157  | <b>-86</b> | 59 | -89 | 112 | -94  |
| RB_11       | 1.0 | 76 | -49 | <b>118</b> | -158 | <b>33</b>  | 51 | -98 | 102 | -100 |
| RB_46       | 1.2 | 88 | -47 | <b>-73</b> | 156  | <b>-87</b> | 60 | -89 | 109 | -92  |
| RB_43       | 1.2 | 87 | -47 | <b>-71</b> | 156  | <b>-87</b> | 59 | -90 | 112 | -93  |
| RB_8        | 1.4 | 79 | -51 | <b>117</b> | -158 | <b>33</b>  | 51 | -99 | 100 | -100 |
| RB_35       | 1.6 | 84 | -44 | <b>-74</b> | 157  | <b>-86</b> | 59 | -89 | 113 | -94  |
| RB_57       | 1.9 | 81 | -52 | <b>117</b> | -157 | <b>32</b>  | 52 | -96 | 98  | -102 |
| RB_40       | 2.0 | 81 | -42 | <b>-74</b> | 158  | <b>-87</b> | 58 | -89 | 115 | -95  |
| RB_13       | 2.0 | 79 | -52 | <b>118</b> | -157 | <b>33</b>  | 51 | -99 | 100 | -100 |
| RB_9        | 2.1 | 81 | -52 | <b>117</b> | -157 | <b>32</b>  | 53 | -96 | 98  | -102 |
| RB_23       | 2.4 | 92 | -51 | <b>-72</b> | 154  | <b>-87</b> | 63 | -90 | 102 | -87  |
| RB_56       | 2.6 | 92 | -51 | <b>-72</b> | 154  | <b>-87</b> | 63 | -91 | 102 | -88  |

So, from the dihedral angle analysis, we could find that these conformers could be classified into two clusters. In cluster  $\alpha$ , there are 7 conformers, in which dihedral angle of 7-6-5-4 is in  $117^\circ\sim 119^\circ$ , and dihedral angle of 5-4-3-2 in  $32^\circ\sim 34^\circ$ . However, in cluster  $\beta$ , there are 8 conformers, in which dihedral angle of 7-6-5-4 is in  $-74^\circ\sim -71^\circ$ , and dihedral angle of 5-4-3-2 in  $-87^\circ\sim -86^\circ$ .

RB\_5 is the most stable conformer in cluster  $\alpha$ , and RB\_6 is the most stable conformer in cluster  $\beta$ . Transition state connecting these two conformers were successfully located, referred to  $\alpha 1\_TS\_ \beta 1$ .

#### 6. Coordinates of stable conformers and transition structure $\alpha 1\_TS\_ \beta 1$ .

|                          |           |           |           |   |           |           |           |
|--------------------------|-----------|-----------|-----------|---|-----------|-----------|-----------|
| $\alpha 1\_TS\_ \beta 1$ |           |           |           | C | 0.189875  | 5.052928  | 0.022882  |
| C                        | 4.077335  | -1.501018 | -0.444012 | O | 0.385762  | -1.161845 | -0.695335 |
| C                        | 2.627107  | -1.839522 | -0.831859 | C | -0.795288 | -0.301516 | -0.429496 |
| C                        | 1.628275  | -0.794456 | -0.354367 | C | -0.935462 | 0.497015  | -1.776058 |
| C                        | 1.923367  | 0.323980  | 0.368165  | C | -1.975532 | 1.648001  | -1.832227 |
| C                        | 3.300648  | 0.602159  | 0.758163  | C | -3.220341 | 1.128333  | -1.181156 |
| C                        | 4.455566  | -0.094349 | 0.015214  | C | -4.525380 | 1.380185  | -1.056459 |
| O                        | 3.569925  | 1.443725  | 1.623439  | C | -5.269750 | 0.387828  | -0.163380 |
| O                        | 4.934573  | -2.364514 | -0.556185 | C | -4.635596 | -1.028916 | -0.023168 |
| C                        | 4.738975  | 0.755232  | -1.263448 | C | -3.246969 | -1.245953 | 0.652487  |
| C                        | 5.722799  | -0.138534 | 0.881273  | C | -1.889683 | -1.413089 | -0.172561 |
| C                        | 2.575804  | -1.954941 | -2.381055 | C | -2.976064 | -2.670765 | 1.273725  |
| C                        | 2.271578  | -3.216224 | -0.216367 | C | -1.500277 | -2.549936 | 0.808969  |
| C                        | 0.839154  | 1.252618  | 0.885853  | C | -3.688743 | -3.823751 | 0.554110  |
| C                        | -0.539295 | 0.556691  | 0.819123  | C | -3.203160 | -2.770690 | 2.781755  |
| C                        | 0.923683  | 2.650955  | 0.217011  | C | -5.295563 | 2.520588  | -1.661333 |
| C                        | 0.097273  | 3.777471  | 0.874713  | H | 5.062018  | 1.759044  | -0.961780 |
| C                        | 0.534915  | 4.070663  | 2.317497  | H | 3.853320  | 0.859396  | -1.899591 |

|   |           |           |           |      |           |           |           |
|---|-----------|-----------|-----------|------|-----------|-----------|-----------|
| H | 5.541338  | 0.292562  | -1.850743 |      |           |           |           |
| H | 6.552237  | -0.579022 | 0.320831  |      |           |           |           |
| H | 6.001046  | 0.873530  | 1.187044  | RB_2 |           |           |           |
| H | 5.566711  | -0.737293 | 1.786642  | C    | 4.008933  | -1.592386 | -0.230874 |
| H | 3.302061  | -2.703402 | -2.716478 | C    | 2.567425  | -1.957683 | -0.624844 |
| H | 1.576802  | -2.269718 | -2.698328 | C    | 1.562170  | -0.865518 | -0.285609 |
| H | 2.807471  | -1.003006 | -2.873344 | C    | 1.840037  | 0.306026  | 0.356463  |
| H | 2.265602  | -3.172050 | 0.879905  | C    | 3.202762  | 0.605670  | 0.776118  |
| H | 1.284124  | -3.540534 | -0.554990 | C    | 4.380510  | -0.161061 | 0.148225  |
| H | 3.012936  | -3.957721 | -0.527339 | O    | 3.448585  | 1.519586  | 1.573022  |
| H | 1.061791  | 1.404438  | 1.953300  | O    | 4.867435  | -2.461348 | -0.271004 |
| H | -1.354241 | 1.300238  | 0.909401  | C    | 4.743961  | 0.586237  | -1.172994 |
| H | -0.621069 | -0.098908 | 1.707621  | C    | 5.598766  | -0.157103 | 1.083940  |
| H | 1.977881  | 2.963812  | 0.223332  | C    | 2.558361  | -2.233537 | -2.153537 |
| H | 0.635354  | 2.570946  | -0.838761 | C    | 2.184606  | -3.258892 | 0.126351  |
| H | -0.960198 | 3.473576  | 0.898053  | C    | 0.743330  | 1.275971  | 0.761451  |
| H | -0.031989 | 4.912335  | 2.735372  | C    | -0.643009 | 0.598246  | 0.661676  |
| H | 0.378889  | 3.213823  | 2.982744  | C    | 0.880296  | 2.635091  | 0.025246  |
| H | 1.600474  | 4.333600  | 2.360998  | C    | 0.067415  | 3.810700  | 0.609509  |
| H | -0.155119 | 4.878639  | -1.004110 | C    | 0.487779  | 4.174388  | 2.041939  |
| H | -0.420252 | 5.861132  | 0.445716  | C    | 0.194673  | 5.036129  | -0.308053 |
| H | 1.225101  | 5.416284  | -0.033811 | O    | 0.333151  | -1.247083 | -0.651028 |
| H | 0.066606  | 0.890499  | -2.033623 | C    | -0.847370 | -0.339937 | -0.535258 |
| H | -1.191639 | -0.250440 | -2.554788 | C    | -0.864227 | 0.343137  | -1.932641 |
| H | -2.117064 | 1.959860  | -2.878344 | C    | -1.884284 | 1.477714  | -2.192753 |
| H | -4.619645 | -1.495636 | -1.019628 | C    | -3.245284 | 0.992530  | -1.804854 |
| H | -3.104531 | -0.500838 | 1.447363  | C    | -4.076132 | 1.473628  | -0.870009 |
| H | -2.135169 | -1.847944 | -1.154565 | C    | -5.146067 | 0.557991  | -0.299188 |
| H | -5.411640 | 0.829290  | 0.839822  | C    | -4.698757 | -0.915566 | -0.205084 |
| H | -6.289835 | 0.240699  | -0.554692 | C    | -3.340755 | -1.158665 | 0.489726  |
| H | -5.355588 | -1.611984 | 0.570610  | C    | -1.984020 | -1.393049 | -0.293685 |
| H | -4.768327 | -3.828690 | 0.747433  | C    | -3.137092 | -2.566191 | 1.168606  |
| H | -3.545191 | -3.789127 | -0.532284 | C    | -1.650062 | -2.510517 | 0.734178  |
| H | -3.290324 | -4.784872 | 0.905184  | C    | -3.873912 | -3.717339 | 0.470177  |
| H | -4.268986 | -2.678856 | 3.032868  | C    | -3.400969 | -2.610107 | 2.673170  |
| H | -2.857572 | -3.736910 | 3.174626  | C    | -3.979811 | 2.842999  | -0.246168 |
| H | -2.666349 | -1.981400 | 3.322855  | H    | 5.577167  | 0.079352  | -1.674521 |
| H | -1.049600 | -3.445209 | 0.367279  | H    | 5.052517  | 1.610741  | -0.931994 |
| H | -0.847670 | -2.200905 | 1.616331  | H    | 3.897449  | 0.639100  | -1.866634 |
| H | -5.778588 | 3.132494  | -0.883674 | H    | 6.448435  | -0.652327 | 0.605637  |
| H | -4.651452 | 3.180786  | -2.254775 | H    | 5.878983  | 0.871072  | 1.327213  |
| H | -6.104450 | 2.158403  | -2.314208 | H    | 5.382508  | -0.681737 | 2.022538  |
| H | -1.593893 | 2.534159  | -1.302045 | H    | 2.786506  | -1.331185 | -2.733801 |
| H | -2.958980 | 0.270069  | -0.612745 | H    | 3.306675  | -2.997145 | -2.391852 |

|      |           |           |           |   |           |           |           |
|------|-----------|-----------|-----------|---|-----------|-----------|-----------|
| H    | 1.573913  | -2.598583 | -2.462215 | C | 3.174293  | 0.683848  | 0.745638  |
| H    | 2.166181  | -3.099289 | 1.211752  | C | 4.352648  | -0.259066 | 0.445044  |
| H    | 1.195977  | -3.602564 | -0.189116 | O | 3.405758  | 1.674399  | 1.453848  |
| H    | 2.917536  | -4.040095 | -0.094850 | O | 4.964730  | -1.911470 | -1.158790 |
| H    | 0.912822  | 1.482854  | 1.829446  | C | 5.568608  | 0.570750  | -0.017304 |
| H    | -1.446292 | 1.358048  | 0.650354  | C | 4.709698  | -0.988896 | 1.773016  |
| H    | -0.790106 | 0.006567  | 1.586223  | C | 2.466625  | -1.971345 | -2.425565 |
| H    | 1.940904  | 2.923310  | 0.038526  | C | 2.369211  | -3.129216 | -0.181186 |
| H    | 0.610411  | 2.509636  | -1.031155 | C | 0.718722  | 1.346740  | 0.673090  |
| H    | -0.995152 | 3.527178  | 0.633873  | C | -0.650112 | 0.629806  | 0.609352  |
| H    | -0.073602 | 5.044981  | 2.404384  | C | 0.810489  | 2.692548  | -0.096013 |
| H    | 0.309118  | 3.356585  | 2.749293  | C | -0.013070 | 3.863275  | 0.484759  |
| H    | 1.555866  | 4.425792  | 2.089173  | C | 0.485249  | 4.317024  | 1.865044  |
| H    | -0.140216 | 4.812676  | -1.328936 | C | -0.002222 | 5.046687  | -0.494938 |
| H    | -0.405323 | 5.877113  | 0.062179  | O | 0.348287  | -1.145947 | -0.791558 |
| H    | 1.237168  | 5.377257  | -0.370229 | C | -0.868187 | -0.302299 | -0.589085 |
| H    | 0.154234  | 0.732167  | -2.130034 | C | -0.995746 | 0.397871  | -1.972505 |
| H    | -1.040360 | -0.462742 | -2.674591 | C | -2.078215 | 1.489128  | -2.150538 |
| H    | -1.818782 | 1.726957  | -3.265124 | C | -3.391068 | 0.934807  | -1.695024 |
| H    | -4.698247 | -1.382400 | -1.200041 | C | -4.183951 | 1.356432  | -0.700459 |
| H    | -3.190428 | -0.390414 | 1.260163  | C | -5.178439 | 0.380957  | -0.092662 |
| H    | -2.210242 | -1.855902 | -1.266162 | C | -4.660296 | -1.072088 | -0.055918 |
| H    | -5.390764 | 0.912589  | 0.714620  | C | -3.255307 | -1.266500 | 0.555191  |
| H    | -6.090954 | 0.625020  | -0.865450 | C | -1.934874 | -1.416431 | -0.306290 |
| H    | -5.471578 | -1.451195 | 0.367578  | C | -2.946581 | -2.676912 | 1.186580  |
| H    | -4.956024 | -3.684341 | 0.646263  | C | -1.488684 | -2.533328 | 0.679025  |
| H    | -3.713233 | -3.716487 | -0.614505 | C | -3.658666 | -3.848062 | 0.496146  |
| H    | -3.511198 | -4.680786 | 0.852601  | C | -3.132451 | -2.768726 | 2.700643  |
| H    | -2.850426 | -1.821824 | 3.201999  | C | -4.107659 | 2.713337  | -0.047636 |
| H    | -4.468403 | -2.475817 | 2.897376  | H | 6.437936  | -0.076847 | -0.162117 |
| H    | -3.095240 | -3.573721 | 3.103867  | H | 5.363340  | 1.085529  | -0.964592 |
| H    | -1.216137 | -3.433590 | 0.334025  | H | 5.806625  | 1.324869  | 0.737676  |
| H    | -1.003534 | -2.152181 | 1.542554  | H | 4.982695  | -0.243247 | 2.527736  |
| H    | -3.764386 | 2.785938  | 0.831646  | H | 3.867950  | -1.575370 | 2.161168  |
| H    | -3.221620 | 3.477810  | -0.715981 | H | 5.559758  | -1.662399 | 1.614536  |
| H    | -4.945295 | 3.365695  | -0.334652 | H | 2.600122  | -1.025077 | -2.964840 |
| H    | -1.609210 | 2.385101  | -1.642528 | H | 3.229093  | -2.674131 | -2.772154 |
| H    | -3.476611 | 0.008117  | -2.214189 | H | 1.479111  | -2.372050 | -2.669330 |
|      |           |           |           | H | 2.409009  | -3.029669 | 0.909966  |
| RB_5 |           |           |           | H | 1.386974  | -3.527471 | -0.453205 |
| C    | 4.046130  | -1.335600 | -0.593677 | H | 3.137404  | -3.844966 | -0.494537 |
| C    | 2.602559  | -1.768284 | -0.895810 | H | 0.895570  | 1.582034  | 1.733443  |
| C    | 1.571130  | -0.752469 | -0.425693 | H | -1.474746 | 1.365732  | 0.629970  |
| C    | 1.831486  | 0.393704  | 0.270665  | H | -0.750124 | 0.028047  | 1.533863  |

|      |           |           |           |   |           |           |           |
|------|-----------|-----------|-----------|---|-----------|-----------|-----------|
| H    | 1.865065  | 3.000370  | -0.116877 | C | 1.894815  | -3.339700 | -0.017235 |
| H    | 0.516140  | 2.537808  | -1.141628 | C | 0.934848  | 1.281492  | 0.881650  |
| H    | -1.058134 | 3.538128  | 0.595986  | C | -0.516421 | 0.745858  | 0.863922  |
| H    | -0.118657 | 5.151348  | 2.244025  | C | 1.160504  | 2.642291  | 0.170055  |
| H    | 0.437482  | 3.515670  | 2.611249  | C | 0.440580  | 3.865188  | 0.779720  |
| H    | 1.527733  | 4.659258  | 1.814786  | C | 0.870696  | 4.149179  | 2.226742  |
| H    | -0.406691 | 4.764231  | -1.475075 | C | 0.684150  | 5.100938  | -0.100329 |
| H    | -0.601848 | 5.884245  | -0.116252 | O | 0.184790  | -1.136764 | -0.576383 |
| H    | 1.019410  | 5.418444  | -0.653867 | C | -0.896300 | -0.135308 | -0.335682 |
| H    | -0.008592 | 0.833528  | -2.222812 | C | -0.968901 | 0.594792  | -1.707613 |
| H    | -1.180839 | -0.404088 | -2.716430 | C | -1.801897 | 1.895456  | -1.834267 |
| H    | -2.086662 | 1.760012  | -3.219566 | C | -3.140661 | 1.761735  | -1.169439 |
| H    | -4.696897 | -1.519144 | -1.059339 | C | -4.185066 | 1.038978  | -1.597205 |
| H    | -3.097144 | -0.510815 | 1.336315  | C | -5.209910 | 0.613365  | -0.575075 |
| H    | -2.191513 | -1.873458 | -1.273959 | C | -4.776050 | -0.722513 | 0.076128  |
| H    | -5.383968 | 0.703964  | 0.940181  | C | -3.401367 | -0.739565 | 0.774421  |
| H    | -6.154649 | 0.413723  | -0.606272 | C | -2.087988 | -1.108821 | -0.029472 |
| H    | -5.373662 | -1.653687 | 0.547909  | C | -3.144583 | -1.974567 | 1.729577  |
| H    | -4.733487 | -3.865527 | 0.714135  | C | -1.768839 | -2.192871 | 1.042153  |
| H    | -3.541072 | -3.822447 | -0.593745 | C | -4.076486 | -3.179132 | 1.548022  |
| H    | -3.239148 | -4.800562 | 0.846550  | C | -3.070894 | -1.598922 | 3.211417  |
| H    | -2.757526 | -3.724435 | 3.092761  | C | -4.309718 | 0.435772  | -2.973577 |
| H    | -2.598166 | -1.964311 | 3.221818  | H | 3.733790  | 0.474319  | -1.999197 |
| H    | -4.193059 | -2.696397 | 2.979182  | H | 5.374932  | -0.218231 | -2.007227 |
| H    | -1.027156 | -3.424343 | 0.238969  | H | 5.054072  | 1.315357  | -1.162262 |
| H    | -0.822197 | -2.154309 | 1.461660  | H | 6.044747  | 0.422490  | 0.975175  |
| H    | -3.845183 | 2.638343  | 1.018546  | H | 5.508477  | -1.122948 | 1.657130  |
| H    | -3.391306 | 3.384641  | -0.532067 | H | 6.420478  | -1.100984 | 0.136780  |
| H    | -5.092595 | 3.205308  | -0.083033 | H | 2.464817  | -1.359368 | -2.847054 |
| H    | -1.811760 | 2.397903  | -1.598567 | H | 2.828379  | -3.082715 | -2.603584 |
| H    | -3.602751 | -0.050405 | -2.113501 | H | 1.148063  | -2.504473 | -2.522012 |
|      |           |           |           | H | 1.972110  | -3.226044 | 1.071302  |
|      |           |           |           | H | 0.857734  | -3.579688 | -0.266890 |
| RB_6 |           |           |           | H | 2.533913  | -4.173376 | -0.322375 |
| C    | 3.833557  | -1.826478 | -0.458904 | H | 1.196391  | 1.438256  | 1.939749  |
| C    | 2.338648  | -2.047218 | -0.748895 | H | -1.235830 | 1.583619  | 0.922201  |
| C    | 1.467142  | -0.884414 | -0.292636 | H | -0.658249 | 0.153428  | 1.787578  |
| C    | 1.899689  | 0.226247  | 0.370203  | H | 2.239657  | 2.851851  | 0.182613  |
| C    | 3.311782  | 0.377356  | 0.697503  | H | 0.879167  | 2.554655  | -0.887675 |
| C    | 4.359213  | -0.444847 | -0.076059 | H | -0.642737 | 3.672745  | 0.783879  |
| O    | 3.698482  | 1.209662  | 1.526381  | H | 0.377895  | 5.051339  | 2.611118  |
| O    | 4.603894  | -2.766970 | -0.583115 | H | 0.616824  | 3.327098  | 2.905696  |
| C    | 4.640861  | 0.328234  | -1.402764 | H | 1.955438  | 4.309654  | 2.292324  |
| C    | 5.664175  | -0.570709 | 0.722509  | H | 0.343791  | 4.936555  | -1.130532 |
| C    | 2.186171  | -2.256217 | -2.280661 |   |           |           |           |

|      |           |           |           |   |           |           |           |
|------|-----------|-----------|-----------|---|-----------|-----------|-----------|
| H    | 0.154103  | 5.979772  | 0.288369  | O | 0.194875  | -0.999750 | -0.762380 |
| H    | 1.753036  | 5.351590  | -0.141525 | C | -0.922346 | -0.077311 | -0.391364 |
| H    | 0.071062  | 0.823598  | -2.015719 | C | -1.136747 | 0.703574  | -1.719741 |
| H    | -1.355220 | -0.144540 | -2.437130 | C | -2.035477 | 1.965094  | -1.714951 |
| H    | -1.892637 | 2.116730  | -2.907959 | C | -3.300559 | 1.728446  | -0.943231 |
| H    | -4.812678 | -1.520532 | -0.680002 | C | -4.360174 | 1.002966  | -1.326671 |
| H    | -3.274042 | 0.190773  | 1.342283  | C | -5.266667 | 0.462212  | -0.248008 |
| H    | -2.356886 | -1.585173 | -0.984352 | C | -4.722896 | -0.893042 | 0.266109  |
| H    | -5.301683 | 1.377239  | 0.211067  | C | -3.299733 | -0.893615 | 0.859659  |
| H    | -6.208541 | 0.482751  | -1.020254 | C | -2.028574 | -1.136330 | -0.051985 |
| H    | -5.537756 | -0.984293 | 0.826293  | C | -2.918389 | -2.180519 | 1.696868  |
| H    | -5.090394 | -2.982508 | 1.918337  | C | -1.567288 | -2.247121 | 0.934906  |
| H    | -4.158024 | -3.490469 | 0.500086  | C | -3.777038 | -3.425042 | 1.440459  |
| H    | -3.684303 | -4.036551 | 2.111405  | C | -2.803967 | -1.930932 | 3.201953  |
| H    | -2.378757 | -0.765206 | 3.382610  | C | -4.607197 | 0.513028  | -2.730707 |
| H    | -4.055021 | -1.295375 | 3.594673  | H | 5.972771  | 0.803981  | 0.544774  |
| H    | -2.726149 | -2.445556 | 3.821112  | H | 5.437252  | 0.742282  | -1.146895 |
| H    | -1.596330 | -3.200347 | 0.647166  | H | 6.409340  | -0.584255 | -0.481277 |
| H    | -0.921236 | -1.941552 | 1.687540  | H | 3.792902  | -1.976916 | 1.851404  |
| H    | -5.261695 | 0.734344  | -3.438597 | H | 5.429163  | -2.216131 | 1.192773  |
| H    | -3.500900 | 0.737373  | -3.647342 | H | 5.080159  | -0.819874 | 2.244693  |
| H    | -4.320541 | -0.663710 | -2.934324 | H | 2.735384  | -2.682773 | -3.048004 |
| H    | -1.255163 | 2.737900  | -1.394671 | H | 1.038498  | -2.226223 | -2.773799 |
| H    | -3.191932 | 2.139177  | -0.146119 | H | 2.254998  | -0.975473 | -3.110562 |
|      |           |           |           | H | 2.207242  | -3.162868 | 0.669787  |
| RB_7 |           |           |           | H | 1.041206  | -3.499253 | -0.624800 |
| C    | 3.859918  | -1.525268 | -0.893313 | H | 2.747645  | -3.956692 | -0.828282 |
| C    | 2.363702  | -1.822805 | -1.084899 | H | 1.203516  | 1.526766  | 1.842222  |
| C    | 1.473957  | -0.749110 | -0.473990 | H | -1.251549 | 1.588211  | 0.940917  |
| C    | 1.897883  | 0.319370  | 0.263726  | H | -0.594995 | 0.149028  | 1.729753  |
| C    | 3.292271  | 0.448283  | 0.652272  | H | 2.161259  | 2.937101  | 0.013774  |
| C    | 4.342691  | -0.587424 | 0.211009  | H | 0.745282  | 2.617542  | -0.975199 |
| O    | 3.670186  | 1.365802  | 1.394954  | H | -0.689588 | 3.706001  | 0.806934  |
| O    | 4.673537  | -2.099072 | -1.602741 | H | 0.437546  | 5.140875  | 2.525812  |
| C    | 5.622518  | 0.139073  | -0.249207 | H | 0.746142  | 3.428468  | 2.825093  |
| C    | 4.676638  | -1.463383 | 1.454932  | H | 2.003741  | 4.434971  | 2.091633  |
| C    | 2.077255  | -1.931747 | -2.602762 | H | 0.097223  | 4.969654  | -1.194198 |
| C    | 2.072612  | -3.197285 | -0.417478 | H | 0.005461  | 6.026967  | 0.223930  |
| C    | 0.920040  | 1.352997  | 0.793144  | H | 1.576130  | 5.430770  | -0.336828 |
| C    | -0.513745 | 0.774013  | 0.820225  | H | -0.136534 | 0.993567  | -2.098815 |
| C    | 1.086317  | 2.713445  | 0.063913  | H | -1.549967 | -0.021048 | -2.449699 |
| C    | 0.384374  | 3.926890  | 0.712527  | H | -2.232688 | 2.226923  | -2.764590 |
| C    | 0.922091  | 4.245405  | 2.116051  | H | -4.782608 | -1.636224 | -0.542666 |
| C    | 0.521384  | 5.155701  | -0.199337 | H | -3.170572 | -0.004197 | 1.489184  |



|      |           |           |           |   |           |           |           |
|------|-----------|-----------|-----------|---|-----------|-----------|-----------|
| H    | -2.339780 | -1.585082 | -1.007211 | C | -4.906810 | -0.336421 | -0.036365 |
| H    | -5.316344 | 1.166704  | 0.595409  | C | -3.547360 | -0.792000 | 0.536425  |
| H    | -6.296175 | 0.316109  | -0.610007 | C | -2.267504 | -1.093722 | -0.348605 |
| H    | -5.411330 | -1.245705 | 1.049677  | C | -3.464549 | -2.270140 | 1.073908  |
| H    | -4.783539 | -3.334801 | 1.867301  | C | -2.000889 | -2.322305 | 0.565356  |
| H    | -3.886497 | -3.643275 | 0.371719  | C | -4.350603 | -3.268892 | 0.316417  |
| H    | -3.304877 | -4.301847 | 1.903804  | C | -3.664595 | -2.430907 | 2.580504  |
| H    | -2.384333 | -2.803570 | 3.721559  | C | -3.750804 | 3.307227  | 0.160584  |
| H    | -2.155399 | -1.073402 | 3.420441  | H | 5.480232  | -0.459273 | -1.435241 |
| H    | -3.786838 | -1.724049 | 3.647728  | H | 5.177456  | 1.029187  | -0.509100 |
| H    | -1.330914 | -3.213697 | 0.475882  | H | 3.931962  | 0.402850  | -1.609412 |
| H    | -0.713191 | -1.957350 | 1.555548  | H | 6.092318  | -1.573559 | 0.787944  |
| H    | -5.609055 | 0.816921  | -3.071384 | H | 5.698767  | -0.079570 | 1.669917  |
| H    | -3.879332 | 0.899191  | -3.451830 | H | 4.936453  | -1.611310 | 2.131916  |
| H    | -4.586710 | -0.585541 | -2.788393 | H | 1.254995  | -2.269115 | -2.801605 |
| H    | -1.491777 | 2.814399  | -1.284777 | H | 2.672964  | -1.201828 | -2.780476 |
| H    | -3.264168 | 2.020610  | 0.108151  | H | 2.889312  | -2.964967 | -2.698360 |
|      |           |           |           | H | 2.193305  | -4.274969 | -0.638980 |
| RB_8 |           |           |           | H | 1.457334  | -3.460364 | 0.756102  |
| C    | 3.608740  | -2.026990 | -0.287389 | H | 0.560345  | -3.583790 | -0.772491 |
| C    | 2.170021  | -2.108547 | -0.824334 | H | 0.909085  | 1.429312  | 1.841848  |
| C    | 1.300562  | -0.936297 | -0.383461 | H | -1.433918 | 1.520490  | 0.754488  |
| C    | 1.707885  | 0.125769  | 0.373441  | H | -0.885032 | 0.038432  | 1.561513  |
| C    | 3.048905  | 0.123573  | 0.949008  | H | 0.987002  | 2.355248  | -1.068151 |
| C    | 4.154148  | -0.723889 | 0.291828  | H | 0.036993  | 3.171925  | 0.166884  |
| O    | 3.341021  | 0.829912  | 1.920379  | H | 3.067387  | 2.828221  | 0.320173  |
| O    | 4.327904  | -3.011367 | -0.371533 | H | 3.154889  | 5.224069  | -0.382210 |
| C    | 4.714382  | 0.114673  | -0.899260 | H | 2.422451  | 4.219649  | -1.643646 |
| C    | 5.291035  | -1.016613 | 1.281644  | H | 1.399731  | 5.232420  | -0.612071 |
| C    | 2.254647  | -2.131743 | -2.377196 | H | 2.039938  | 3.184360  | 2.561375  |
| C    | 1.552168  | -3.442105 | -0.336648 | H | 2.922028  | 4.625064  | 2.048250  |
| C    | 0.733793  | 1.221691  | 0.775876  | H | 1.154583  | 4.594952  | 1.945035  |
| C    | -0.713139 | 0.685295  | 0.678263  | H | -0.031810 | 0.937343  | -2.162549 |
| C    | 0.939661  | 2.560236  | 0.009232  | H | -1.375066 | -0.086951 | -2.698435 |
| C    | 2.155349  | 3.435192  | 0.387010  | H | -1.953080 | 2.201952  | -3.103738 |
| C    | 2.291122  | 4.589674  | -0.618677 | H | -5.025348 | -0.708572 | -1.063567 |
| C    | 2.060410  | 3.985742  | 1.816361  | H | -3.267456 | -0.124084 | 1.362340  |
| O    | 0.047748  | -1.119685 | -0.818579 | H | -2.593360 | -1.446875 | -1.338510 |
| C    | -1.046887 | -0.132793 | -0.573746 | H | -5.309407 | 1.470448  | 1.078811  |
| C    | -1.071568 | 0.644559  | -1.921529 | H | -6.151292 | 1.401627  | -0.456605 |
| C    | -1.976419 | 1.893968  | -2.045025 | H | -5.699688 | -0.831394 | 0.545557  |
| C    | -3.354822 | 1.530488  | -1.591737 | H | -5.414294 | -3.136481 | 0.548872  |
| C    | -4.056017 | 2.018090  | -0.559163 | H | -4.236125 | -3.188718 | -0.771163 |
| C    | -5.182405 | 1.180733  | 0.023503  | H | -4.081819 | -4.296088 | 0.597052  |

|      |           |           |           |   |           |           |           |
|------|-----------|-----------|-----------|---|-----------|-----------|-----------|
| H    | -3.008859 | -1.758969 | 3.148445  | C | -4.580362 | 1.699045  | -1.344285 |
| H    | -4.700273 | -2.209038 | 2.873624  | H | 6.007176  | 1.148345  | -0.075661 |
| H    | -3.446779 | -3.458065 | 2.904793  | H | 5.005016  | 2.220035  | 0.938611  |
| H    | -1.680197 | -3.245994 | 0.071639  | H | 4.605689  | 1.984920  | -0.777007 |
| H    | -1.287568 | -2.095971 | 1.365363  | H | 5.695509  | -0.716072 | 1.619974  |
| H    | -3.459159 | 3.129313  | 1.206840  | H | 4.677564  | 0.357002  | 2.617063  |
| H    | -2.959068 | 3.890415  | -0.320724 | H | 4.071490  | -1.235879 | 2.124590  |
| H    | -4.649878 | 3.941997  | 0.199683  | H | 2.079664  | -2.268980 | -2.937843 |
| H    | -1.567168 | 2.728689  | -1.465397 | H | 2.934573  | -0.722947 | -3.131654 |
| H    | -3.727021 | 0.615848  | -2.055526 | H | 3.854170  | -2.210190 | -2.830719 |
| RB_9 |           |           |           | H | 1.914250  | -3.390342 | -0.685044 |
| C    | 4.128034  | -0.748789 | -0.594510 | H | 2.732600  | -2.723488 | 0.744073  |
| C    | 2.844120  | -1.450713 | -1.061687 | H | 3.690795  | -3.406681 | -0.589799 |
| C    | 1.594265  | -0.639697 | -0.742673 | H | -0.130549 | 1.139274  | 1.157679  |
| C    | 1.552548  | 0.514638  | -0.009419 | H | -0.511305 | 1.277873  | -1.875734 |
| C    | 2.693523  | 0.848009  | 0.829145  | H | -1.778922 | 1.188637  | -0.635022 |
| C    | 4.093565  | 0.288671  | 0.526710  | H | 1.302941  | 3.144924  | 0.614278  |
| O    | 2.578448  | 1.597897  | 1.809210  | H | 0.861822  | 2.978375  | -1.084300 |
| O    | 5.200328  | -1.073506 | -1.083645 | H | -1.539151 | 3.435921  | -0.475560 |
| C    | 4.986658  | 1.488405  | 0.124697  | H | -2.057345 | 4.390121  | 1.781722  |
| C    | 4.670790  | -0.374796 | 1.803379  | H | -1.574128 | 2.696762  | 1.914521  |
| C    | 2.930433  | -1.677274 | -2.590261 | H | -0.426665 | 3.975520  | 2.337014  |
| C    | 2.791304  | -2.829955 | -0.345414 | H | -0.024460 | 5.259106  | -1.246100 |
| C    | 0.257014  | 1.301077  | 0.137604  | H | -1.199169 | 5.868692  | -0.068305 |
| C    | -0.773999 | 0.817669  | -0.899726 | H | 0.474630  | 5.567609  | 0.424905  |
| C    | 0.498174  | 2.823133  | -0.055966 | H | -0.663105 | -0.692653 | -3.267883 |
| C    | -0.715089 | 3.748334  | 0.182601  | H | -1.519947 | -2.113518 | -2.621260 |
| C    | -1.221005 | 3.695260  | 1.631805  | H | -3.071559 | -0.802324 | -3.904629 |
| C    | -0.346718 | 5.190179  | -0.199377 | H | -4.250259 | -2.320076 | 0.380474  |
| O    | 0.522443  | -1.231314 | -1.279866 | H | -2.461456 | -0.005084 | 1.272961  |
| C    | -0.862619 | -0.691828 | -1.121017 | H | -1.819122 | -2.494732 | -0.417928 |
| C    | -1.431346 | -1.011119 | -2.535450 | H | -4.984823 | 0.602837  | 0.958310  |
| C    | -2.779517 | -0.363571 | -2.936176 | H | -6.008912 | -0.595459 | 0.195157  |
| C    | -3.777988 | -0.641832 | -1.857543 | H | -4.510106 | -1.540376 | 1.924301  |
| C    | -4.421669 | 0.225945  | -1.064321 | H | -3.340800 | -3.303614 | 2.924558  |
| C    | -4.960714 | -0.258102 | 0.271141  | H | -2.498412 | -3.860151 | 1.470446  |
| C    | -4.106548 | -1.370231 | 0.913944  | H | -1.670866 | -3.872707 | 3.031889  |
| C    | -2.598047 | -1.075078 | 1.062606  | H | -1.017001 | -1.719273 | 4.195018  |
| C    | -1.487191 | -1.548964 | 0.035928  | H | -1.262807 | -0.159614 | 3.392654  |
| C    | -1.837642 | -1.884159 | 2.179900  | H | -2.650268 | -1.057684 | 4.030852  |
| C    | -0.589838 | -1.895491 | 1.260182  | H | -0.027543 | -2.834437 | 1.202375  |
| C    | -2.373333 | -3.304778 | 2.407490  | H | 0.104262  | -1.094126 | 1.521730  |
| C    | -1.683374 | -1.164924 | 3.519655  | H | -5.647210 | 1.972701  | -1.331496 |
|      |           |           |           | H | -4.177755 | 1.997316  | -2.317739 |

|       |           |           |           |       |           |           |           |
|-------|-----------|-----------|-----------|-------|-----------|-----------|-----------|
| H     | -4.100087 | 2.315394  | -0.569370 | H     | -1.488940 | -2.672669 | 2.428415  |
| H     | -2.654150 | 0.713208  | -3.103262 | H     | -2.746019 | -1.450355 | 2.702984  |
| H     | -3.804597 | -1.693171 | -1.568203 | H     | -3.206539 | -3.128760 | 2.338468  |
| RB_11 |           |           |           | H     | -2.027893 | -3.153748 | -1.254566 |
| C     | -3.934222 | -1.718648 | 0.184804  | H     | -1.060905 | -3.644001 | 0.153073  |
| C     | -2.486346 | -2.045771 | 0.588732  | H     | -2.767008 | -4.131608 | 0.031095  |
| C     | -1.513372 | -0.919345 | 0.269898  | H     | -0.935178 | 1.485923  | -1.799346 |
| C     | -1.825013 | 0.256704  | -0.346490 | H     | 1.426625  | 1.409229  | -0.626808 |
| C     | -3.197706 | 0.542645  | -0.736659 | H     | 0.807424  | 0.049583  | -1.581928 |
| C     | -4.352193 | -0.287941 | -0.146502 | H     | -1.870900 | 2.614925  | 0.582760  |
| O     | -3.473131 | 1.495079  | -1.477163 | H     | -0.133534 | 2.746988  | 0.767174  |
| O     | -4.761478 | -2.618179 | 0.180112  | H     | -1.746769 | 3.722024  | -1.628914 |
| C     | -4.753068 | 0.398972  | 1.195988  | H     | -1.356347 | 6.015407  | -0.717327 |
| C     | -5.563446 | -0.292265 | -1.092081 | H     | -2.245516 | 5.019725  | 0.446187  |
| C     | -2.482537 | -2.337622 | 2.114750  | H     | -0.517806 | 5.331200  | 0.683213  |
| C     | -2.055221 | -3.326186 | -0.171318 | H     | 0.618246  | 3.215124  | -2.289332 |
| C     | -0.760240 | 1.268035  | -0.733174 | H     | 0.300962  | 4.951767  | -2.323035 |
| C     | 0.645847  | 0.625933  | -0.649807 | H     | 1.209322  | 4.249812  | -0.976753 |
| C     | -0.927895 | 2.626830  | 0.019369  | H     | -0.170622 | 0.732234  | 2.114548  |
| C     | -0.944401 | 3.873362  | -0.891466 | H     | 0.999521  | -0.480994 | 2.673569  |
| C     | -1.286112 | 5.127762  | -0.075598 | H     | 1.792773  | 1.656545  | 3.353300  |
| C     | 0.367823  | 4.078357  | -1.661483 | H     | 4.769548  | -1.280658 | 1.186581  |
| O     | -0.273526 | -1.269119 | 0.629223  | H     | 3.226848  | -0.275598 | -1.249659 |
| C     | 0.876572  | -0.320508 | 0.535814  | H     | 2.284671  | -1.801814 | 1.255439  |
| C     | 0.853074  | 0.341472  | 1.943629  | H     | 5.372660  | 1.095499  | -0.658505 |
| C     | 1.867328  | 1.465852  | 2.269643  | H     | 6.096735  | 0.779895  | 0.905324  |
| C     | 3.236004  | 1.020252  | 1.864919  | H     | 5.536794  | -1.275442 | -0.385752 |
| C     | 4.056288  | 1.561358  | 0.953699  | H     | 5.088118  | -3.525622 | -0.685046 |
| C     | 5.149218  | 0.699684  | 0.345050  | H     | 3.848868  | -3.610946 | 0.576651  |
| C     | 4.749849  | -0.783409 | 0.206580  | H     | 3.672733  | -4.560914 | -0.903005 |
| C     | 3.398345  | -1.051327 | -0.491239 | H     | 2.927564  | -1.689222 | -3.213056 |
| C     | 2.047728  | -1.334983 | 0.287545  | H     | 4.562526  | -2.304441 | -2.918690 |
| C     | 3.235952  | -2.454092 | -1.190025 | H     | 3.218120  | -3.435111 | -3.138973 |
| C     | 1.748858  | -2.450667 | -0.753402 | H     | 1.346905  | -3.392190 | -0.363053 |
| C     | 4.007698  | -3.592435 | -0.508173 | H     | 1.088630  | -2.104859 | -1.556053 |
| C     | 3.499271  | -2.469861 | -2.695473 | H     | 3.706382  | 2.932916  | -0.690553 |
| C     | 3.925956  | 2.952908  | 0.387715  | H     | 3.155337  | 3.549967  | 0.886008  |
| H     | -5.098366 | 1.418648  | 0.986944  | H     | 4.879495  | 3.493733  | 0.493243  |
| H     | -3.915110 | 0.459256  | 1.899290  | H     | 1.591216  | 2.400683  | 1.768953  |
| H     | -5.570449 | -0.155712 | 1.672452  | H     | 3.488034  | 0.024850  | 2.232104  |
| H     | -5.876247 | 0.734216  | -1.300420 | RB_13 |           |           |           |
| H     | -5.321939 | -0.775060 | -2.046841 | C     | -3.683018 | -1.721673 | 0.685680  |
| H     | -6.399106 | -0.833064 | -0.639012 | C     | -2.198740 | -1.973424 | 0.990084  |

|   |           |           |           |       |           |           |           |
|---|-----------|-----------|-----------|-------|-----------|-----------|-----------|
| C | -1.311104 | -0.841866 | 0.484587  | H     | 1.439024  | 1.553378  | -0.749238 |
| C | -1.710336 | 0.189007  | -0.322376 | H     | 0.857902  | 0.068127  | -1.525251 |
| C | -3.017346 | 0.144630  | -0.958830 | H     | -0.959876 | 2.395181  | 1.131015  |
| C | -4.102147 | -0.842966 | -0.490969 | H     | -0.023242 | 3.224440  | -0.106422 |
| O | -3.302836 | 0.888657  | -1.907711 | H     | -3.053430 | 2.869082  | -0.243487 |
| O | -4.536079 | -2.285661 | 1.355503  | H     | -3.156428 | 5.252047  | 0.502737  |
| C | -5.356212 | -0.029535 | -0.096582 | H     | -2.412803 | 4.230443  | 1.743835  |
| C | -4.459712 | -1.783256 | -1.674999 | H     | -1.400695 | 5.269195  | 0.727370  |
| C | -2.026888 | -2.133924 | 2.518764  | H     | -2.036135 | 3.273709  | -2.479452 |
| C | -1.804911 | -3.309692 | 0.296256  | H     | -2.928750 | 4.697845  | -1.938662 |
| C | -0.731235 | 1.279123  | -0.725901 | H     | -1.160710 | 4.681237  | -1.841848 |
| C | 0.711015  | 0.727110  | -0.646631 | H     | 0.146388  | 1.070570  | 2.207919  |
| C | -0.923995 | 2.610710  | 0.055333  | H     | 1.470562  | 0.009781  | 2.720566  |
| C | -2.146514 | 3.484912  | -0.301316 | H     | 2.139533  | 2.291766  | 3.037723  |
| C | -2.287371 | 4.619901  | 0.725360  | H     | 5.024343  | -0.810605 | 1.000711  |
| C | -2.060848 | 4.062051  | -1.720846 | H     | 3.222831  | -0.206969 | -1.388341 |
| O | -0.062815 | -1.013661 | 0.927599  | H     | 2.565976  | -1.443053 | 1.357393  |
| C | 1.059691  | -0.076118 | 0.610723  | H     | 5.338741  | 1.296867  | -1.207974 |
| C | 1.163958  | 0.731937  | 1.936188  | H     | 6.227105  | 1.229873  | 0.300944  |
| C | 2.119407  | 1.947726  | 1.990123  | H     | 5.644234  | -1.004426 | -0.622881 |
| C | 3.466853  | 1.511042  | 1.509418  | H     | 5.257740  | -3.288585 | -0.548005 |
| C | 4.166240  | 1.945509  | 0.452283  | H     | 4.106080  | -3.260322 | 0.795701  |
| C | 5.233664  | 1.041385  | -0.141414 | H     | 3.877570  | -4.391472 | -0.543089 |
| C | 4.891948  | -0.459262 | -0.032031 | H     | 2.856830  | -1.869926 | -3.131279 |
| C | 3.497432  | -0.867313 | -0.554727 | H     | 4.533824  | -2.383145 | -2.880507 |
| C | 2.229906  | -1.093242 | 0.369640  | H     | 3.230542  | -3.579986 | -2.856568 |
| C | 3.336330  | -2.351605 | -1.055036 | H     | 1.534262  | -3.223823 | 0.009037  |
| C | 1.884221  | -2.326115 | -0.512409 | H     | 1.161815  | -2.083429 | -1.299691 |
| C | 4.194444  | -3.370495 | -0.291745 | H     | 3.593849  | 3.056626  | -1.321691 |
| C | 3.496476  | -2.555444 | -2.561189 | H     | 3.154518  | 3.864073  | 0.201390  |
| C | 3.910001  | 3.236444  | -0.282809 | H     | 4.837513  | 3.826704  | -0.346239 |
| H | -5.151271 | 0.630946  | 0.755634  | H     | 1.726682  | 2.778444  | 1.393171  |
| H | -6.173027 | -0.701890 | 0.181543  | H     | 3.804758  | 0.587074  | 1.980343  |
| H | -5.673249 | 0.587082  | -0.942622 |       |           |           |           |
| H | -5.248605 | -2.482016 | -1.374154 | RB_23 |           |           |           |
| H | -4.820338 | -1.180236 | -2.514851 | C     | 3.789136  | -1.750139 | -0.200015 |
| H | -3.595152 | -2.363009 | -2.019483 | C     | 2.399573  | -2.011569 | -0.806591 |
| H | -0.992763 | -2.391337 | 2.760665  | C     | 1.423891  | -0.859730 | -0.589370 |
| H | -2.287104 | -1.208624 | 3.048003  | C     | 1.711910  | 0.337523  | 0.000097  |
| H | -2.682865 | -2.929873 | 2.881273  | C     | 2.982816  | 0.488482  | 0.700935  |
| H | -1.846780 | -3.233375 | -0.796210 | C     | 4.194330  | -0.350292 | 0.257003  |
| H | -0.784865 | -3.586894 | 0.580481  | O     | 3.128186  | 1.316158  | 1.607782  |
| H | -2.484638 | -4.107490 | 0.617399  | O     | 4.583420  | -2.675590 | -0.125365 |
| H | -0.913296 | 1.497982  | -1.787808 | C     | 4.812258  | 0.376548  | -0.978513 |

|   |           |           |           |       |           |           |           |
|---|-----------|-----------|-----------|-------|-----------|-----------|-----------|
| C | 5.248124  | -0.435757 | 1.370351  | H     | 0.802704  | 4.462484  | 1.905166  |
| C | 2.594331  | -2.228612 | -2.334577 | H     | 1.263881  | 5.121510  | -1.841382 |
| C | 1.844750  | -3.316931 | -0.183973 | H     | 0.358630  | 6.156754  | -0.724661 |
| C | 0.670689  | 1.442432  | 0.105397  | H     | 1.939463  | 5.514750  | -0.251864 |
| C | -0.548552 | 1.124480  | -0.783585 | H     | -0.882805 | -0.654131 | -3.021861 |
| C | 1.262764  | 2.813419  | -0.321555 | H     | -2.177814 | -1.584752 | -2.229650 |
| C | 0.328632  | 4.035488  | -0.184931 | H     | -3.180944 | 0.038708  | -3.683577 |
| C | -0.080018 | 4.302703  | 1.271022  | H     | -4.458701 | -1.797307 | 0.837480  |
| C | 1.009325  | 5.275085  | -0.784978 | H     | -2.768510 | 0.732046  | 1.248718  |
| O | 0.217698  | -1.199881 | -1.062481 | H     | -2.032505 | -1.983888 | -0.001463 |
| C | -0.992086 | -0.338028 | -0.896426 | H     | -5.194332 | 1.155938  | 0.406979  |
| C | -1.692903 | -0.589136 | -2.268164 | H     | -6.280155 | -0.231039 | 0.209558  |
| C | -2.724308 | 0.451379  | -2.772463 | H     | -4.807019 | -0.622093 | 2.092627  |
| C | -3.739250 | 0.741905  | -1.705633 | H     | -3.706935 | -2.216422 | 3.423920  |
| C | -4.712623 | -0.080393 | -1.290559 | H     | -2.788363 | -3.038585 | 2.151385  |
| C | -5.233354 | 0.096707  | 0.112742  | H     | -2.045617 | -2.738316 | 3.725156  |
| C | -4.364139 | -0.731137 | 1.089471  | H     | -1.402448 | -0.416968 | 4.468631  |
| C | -2.872237 | -0.361514 | 1.219885  | H     | -1.614783 | 0.963746  | 3.379437  |
| C | -1.710153 | -0.986353 | 0.335972  | H     | -3.026559 | 0.199645  | 4.129012  |
| C | -2.159293 | -0.958589 | 2.494325  | H     | -0.350029 | -2.103209 | 1.767385  |
| C | -0.879630 | -1.151659 | 1.643701  | H     | -0.167505 | -0.342035 | 1.809424  |
| C | -2.714452 | -2.309599 | 2.967002  | H     | -6.267429 | -1.291490 | -2.157540 |
| C | -2.043813 | -0.000355 | 3.679778  | H     | -4.727096 | -1.399471 | -3.028039 |
| C | -5.173881 | -1.309304 | -2.032608 | H     | -4.945179 | -2.231541 | -1.478097 |
| H | 5.152957  | 1.374325  | -0.675934 | H     | -2.213657 | 1.374721  | -3.075283 |
| H | 5.675779  | -0.188558 | -1.349470 | H     | -3.517744 | 1.601709  | -1.070384 |
| H | 4.092815  | 0.495762  | -1.795840 |       |           |           |           |
| H | 6.128332  | -0.982502 | 1.020393  | RB_35 |           |           |           |
| H | 5.553697  | 0.569139  | 1.673917  | C     | -3.815268 | -1.590050 | 0.852890  |
| H | 4.854104  | -0.951700 | 2.254151  | C     | -2.333560 | -1.727642 | 1.244606  |
| H | 1.644914  | -2.522821 | -2.793215 | C     | -1.446409 | -0.702545 | 0.552252  |
| H | 2.951217  | -1.320462 | -2.834511 | C     | -1.883392 | 0.320848  | -0.236939 |
| H | 3.325533  | -3.027072 | -2.501776 | C     | -3.273863 | 0.398675  | -0.650956 |
| H | 1.710329  | -3.216511 | 0.899986  | C     | -4.226472 | -0.780570 | -0.374187 |
| H | 0.880382  | -3.570863 | -0.631417 | O     | -3.696934 | 1.355900  | -1.312670 |
| H | 2.544676  | -4.137220 | -0.366648 | O     | -4.656586 | -2.183458 | 1.511487  |
| H | 0.361279  | 1.522775  | 1.160429  | C     | -5.675042 | -0.289214 | -0.227990 |
| H | -0.299006 | 1.460721  | -1.810998 | C     | -4.129175 | -1.730531 | -1.608163 |
| H | -1.415075 | 1.728537  | -0.459151 | C     | -2.220680 | -1.516971 | 2.777636  |
| H | 2.165933  | 3.012479  | 0.267160  | C     | -1.888975 | -3.174270 | 0.900172  |
| H | 1.582336  | 2.731425  | -1.372657 | C     | -0.935604 | 1.390650  | -0.742464 |
| H | -0.587282 | 3.852073  | -0.765545 | C     | 0.510010  | 0.837443  | -0.772368 |
| H | -0.707355 | 5.200241  | 1.345143  | C     | -1.136830 | 2.745592  | 0.006065  |
| H | -0.649549 | 3.471653  | 1.702973  | C     | -1.191873 | 3.990491  | -0.904640 |

|   |           |           |           |       |           |           |           |
|---|-----------|-----------|-----------|-------|-----------|-----------|-----------|
| C | -1.533576 | 5.238520  | -0.078582 | H     | 4.767295  | -1.668076 | 0.472038  |
| C | 0.092955  | 4.220790  | -1.713206 | H     | 3.131379  | -0.012332 | -1.520503 |
| O | -0.169172 | -0.898290 | 0.886386  | H     | 2.353157  | -1.529112 | 1.030803  |
| C | 0.945018  | -0.002334 | 0.440512  | H     | 5.342020  | 1.104467  | -0.718413 |
| C | 1.221102  | 0.803893  | 1.741564  | H     | 6.335669  | 0.239248  | 0.465353  |
| C | 2.166194  | 2.031514  | 1.687832  | H     | 5.348636  | -1.314561 | -1.146772 |
| C | 3.395967  | 1.744794  | 0.877502  | H     | 4.629532  | -3.389144 | -1.932479 |
| C | 4.444382  | 0.990296  | 1.234946  | H     | 3.795405  | -3.658109 | -0.393334 |
| C | 5.299609  | 0.411319  | 0.134695  | H     | 3.125636  | -4.316800 | -1.888541 |
| C | 4.699709  | -0.932990 | -0.343429 | H     | 2.160515  | -2.811194 | -3.680144 |
| C | 3.256594  | -0.897947 | -0.885073 | H     | 2.000219  | -1.071411 | -3.391081 |
| C | 2.016054  | -1.090907 | 0.079404  | H     | 3.598125  | -1.776441 | -3.683270 |
| C | 2.805577  | -2.183606 | -1.689580 | H     | 1.247165  | -3.158903 | -0.385294 |
| C | 1.487618  | -2.205650 | -0.869099 | H     | 0.615569  | -1.903547 | -1.458126 |
| C | 3.642025  | -3.448135 | -1.458296 | H     | 5.735388  | 0.790417  | 2.947822  |
| C | 2.630603  | -1.946736 | -3.190941 | H     | 4.018227  | 0.910299  | 3.372785  |
| C | 4.718898  | 0.504994  | 2.635461  | H     | 4.677871  | -0.592557 | 2.700754  |
| H | -5.967234 | 0.275872  | -1.116961 | H     | 1.637508  | 2.894907  | 1.264657  |
| H | -5.787924 | 0.364809  | 0.645288  | H     | 3.333931  | 2.028671  | -0.175263 |
| H | -6.355478 | -1.136962 | -0.107624 |       |           |           |           |
| H | -3.105548 | -2.080316 | -1.783254 | RB_40 |           |           |           |
| H | -4.778179 | -2.602534 | -1.463293 | C     | -3.774643 | -1.924223 | 0.387229  |
| H | -4.463185 | -1.190464 | -2.502098 | C     | -2.278075 | -2.117652 | 0.688723  |
| H | -2.869823 | -2.228512 | 3.296073  | C     | -1.430867 | -0.922689 | 0.273255  |
| H | -1.188969 | -1.674578 | 3.105103  | C     | -1.886127 | 0.202832  | -0.346626 |
| H | -2.524180 | -0.501632 | 3.061921  | C     | -3.302140 | 0.352754  | -0.650763 |
| H | -1.909785 | -3.365599 | -0.179061 | C     | -4.334273 | -0.541722 | 0.059752  |
| H | -0.870639 | -3.348691 | 1.259784  | O     | -3.707735 | 1.242350  | -1.408794 |
| H | -2.559731 | -3.888096 | 1.390546  | O     | -4.521016 | -2.888982 | 0.461432  |
| H | -1.215306 | 1.577093  | -1.791539 | C     | -4.666667 | 0.155704  | 1.416008  |
| H | 1.232444  | 1.665110  | -0.890855 | C     | -5.618980 | -0.668099 | -0.772259 |
| H | 0.600332  | 0.216597  | -1.683514 | C     | -2.136459 | -2.361464 | 2.216671  |
| H | -2.083829 | 2.706054  | 0.560839  | C     | -1.794370 | -3.379465 | -0.070460 |
| H | -0.352451 | 2.885546  | 0.761206  | C     | -0.949191 | 1.296920  | -0.825486 |
| H | -2.012241 | 3.826549  | -1.620607 | C     | 0.518264  | 0.800065  | -0.812735 |
| H | -1.641492 | 6.123747  | -0.718345 | C     | -1.209281 | 2.650924  | -0.096093 |
| H | -2.473696 | 5.111302  | 0.473053  | C     | -1.244309 | 3.894096  | -1.010999 |
| H | -0.746124 | 5.457639  | 0.655737  | C     | -1.653971 | 5.133765  | -0.203042 |
| H | 0.325063  | 3.376835  | -2.373024 | C     | 0.074308  | 4.155255  | -1.753581 |
| H | -0.001557 | 5.111810  | -2.347275 | O     | -0.144087 | -1.155344 | 0.551065  |
| H | 0.957368  | 4.379181  | -1.053768 | C     | 0.913514  | -0.118869 | 0.353798  |
| H | 0.240301  | 1.140822  | 2.134699  | C     | 0.957883  | 0.556202  | 1.754916  |
| H | 1.623564  | 0.081564  | 2.479836  | C     | 1.806162  | 1.837544  | 1.971525  |
| H | 2.406999  | 2.299501  | 2.726778  | C     | 3.139338  | 1.749597  | 1.290014  |

|   |           |           |           |       |           |           |           |
|---|-----------|-----------|-----------|-------|-----------|-----------|-----------|
| C | 4.200188  | 1.027773  | 1.676345  | H     | 4.235566  | -3.384211 | -0.633422 |
| C | 5.225520  | 0.672634  | 0.627947  | H     | 3.754946  | -3.866953 | -2.262456 |
| C | 4.808083  | -0.632490 | -0.091331 | H     | 2.752680  | -2.227193 | -3.890825 |
| C | 3.430179  | -0.634623 | -0.783335 | H     | 2.381693  | -0.571454 | -3.382358 |
| C | 2.126657  | -1.054454 | 0.012155  | H     | 4.064164  | -1.063965 | -3.632198 |
| C | 3.185454  | -1.833240 | -1.787055 | H     | 1.672901  | -3.128993 | -0.738622 |
| C | 1.820978  | -2.104117 | -1.097196 | H     | 0.962978  | -1.847422 | -1.726384 |
| C | 4.139012  | -3.028485 | -1.665861 | H     | 5.294462  | 0.656086  | 3.494934  |
| C | 3.089409  | -1.399362 | -3.251479 | H     | 3.534710  | 0.616326  | 3.712237  |
| C | 4.345292  | 0.362389  | 3.021191  | H     | 4.375704  | -0.733524 | 2.928555  |
| H | -5.392718 | -0.443585 | 1.978664  | H     | 1.262932  | 2.715906  | 1.601872  |
| H | -5.107889 | 1.139451  | 1.215092  | H     | 3.173757  | 2.173489  | 0.283937  |
| H | -3.775935 | 0.301103  | 2.036951  |       |           |           |           |
| H | -6.370650 | -1.247848 | -0.229121 | RB_43 |           |           |           |
| H | -6.023394 | 0.324902  | -0.985508 | C     | 3.409377  | -2.071428 | -0.726479 |
| H | -5.427318 | -1.169818 | -1.728523 | C     | 1.970830  | -1.887686 | -1.238969 |
| H | -2.762167 | -3.210261 | 2.513283  | C     | 1.222234  | -0.769789 | -0.524645 |
| H | -1.095049 | -2.591393 | 2.462201  | C     | 1.754364  | 0.098870  | 0.385630  |
| H | -2.440872 | -1.485519 | 2.802143  | C     | 3.099657  | -0.116877 | 0.900430  |
| H | -1.857405 | -3.237637 | -1.156616 | C     | 4.092493  | -0.999929 | 0.122354  |
| H | -0.756388 | -3.604094 | 0.189294  | O     | 3.494497  | 0.438537  | 1.933402  |
| H | -2.420238 | -4.234378 | 0.201473  | O     | 4.025395  | -3.075397 | -1.052444 |
| H | -1.208155 | 1.467438  | -1.883534 | C     | 4.852466  | -0.057294 | -0.861892 |
| H | 1.212955  | 1.659821  | -0.820929 | C     | 5.106142  | -1.653921 | 1.076535  |
| H | 0.692054  | 0.252852  | -1.758832 | C     | 2.059821  | -1.542830 | -2.753859 |
| H | -2.178590 | 2.599555  | 0.417599  | C     | 1.227441  | -3.235570 | -1.077449 |
| H | -0.460912 | 2.806831  | 0.691196  | C     | 0.905016  | 1.212045  | 0.973183  |
| H | -2.023494 | 3.713733  | -1.767912 | C     | -0.581420 | 0.784862  | 0.954757  |
| H | -1.747848 | 6.017556  | -0.846937 | C     | 1.157891  | 2.589827  | 0.299496  |
| H | -2.617938 | 4.986424  | 0.300364  | C     | 2.489437  | 3.306875  | 0.611689  |
| H | -0.908909 | 5.367673  | 0.569913  | C     | 2.676119  | 4.489866  | -0.351224 |
| H | 0.358948  | 3.317302  | -2.400316 | C     | 2.568452  | 3.787412  | 2.067263  |
| H | -0.009445 | 5.043844  | -2.392581 | O     | -0.054418 | -0.752069 | -0.923193 |
| H | 0.900695  | 4.334063  | -1.052014 | C     | -1.090490 | 0.172099  | -0.357845 |
| H | -0.088327 | 0.789172  | 2.041209  | C     | -1.296041 | 1.165646  | -1.538653 |
| H | 1.309787  | -0.221318 | 2.462275  | C     | -2.063420 | 2.489148  | -1.292482 |
| H | 1.905931  | 1.976083  | 3.057910  | C     | -3.330080 | 2.250036  | -0.522651 |
| H | 4.861356  | -1.468415 | 0.621416  | C     | -4.443208 | 1.655739  | -0.975429 |
| H | 3.289508  | 0.317729  | -1.310093 | C     | -5.368290 | 1.026005  | 0.035889  |
| H | 2.408083  | -1.558649 | 0.948809  | C     | -4.923996 | -0.430948 | 0.315794  |
| H | 5.302097  | 1.478975  | -0.116102 | C     | -3.490533 | -0.629600 | 0.848322  |
| H | 6.228027  | 0.533484  | 1.061665  | C     | -2.267964 | -0.841081 | -0.137337 |
| H | 5.569106  | -0.842612 | -0.858305 | C     | -3.195000 | -2.046048 | 1.486783  |
| H | 5.145989  | -2.799732 | -2.036401 | C     | -1.879561 | -2.117002 | 0.664150  |

|   |           |           |           |       |           |           |           |
|---|-----------|-----------|-----------|-------|-----------|-----------|-----------|
| C | -4.164657 | -3.171912 | 1.106920  | H     | -5.731750 | 1.766752  | -2.698379 |
| C | -3.010189 | -2.015195 | 3.005319  | H     | -4.007146 | 1.830232  | -3.105678 |
| C | -4.738290 | 1.377483  | -2.427978 | H     | -4.766006 | 0.297872  | -2.638078 |
| H | 4.174326  | 0.459007  | -1.550800 | H     | -1.425716 | 3.199597  | -0.753765 |
| H | 5.573108  | -0.636328 | -1.451892 | H     | -3.254778 | 2.395508  | 0.556967  |
| H | 5.400024  | 0.698926  | -0.287047 |       |           |           |           |
| H | 5.838801  | -2.236918 | 0.511782  | RB_46 |           |           |           |
| H | 5.629934  | -0.884554 | 1.649641  | C     | -3.500552 | -1.707269 | 1.051059  |
| H | 4.607838  | -2.326482 | 1.785548  | C     | -2.036313 | -1.577932 | 1.501324  |
| H | 2.616427  | -2.328126 | -3.277175 | C     | -1.250229 | -0.600622 | 0.638820  |
| H | 1.052910  | -1.482818 | -3.179729 | C     | -1.772095 | 0.184190  | -0.352825 |
| H | 2.563459  | -0.584262 | -2.926316 | C     | -3.083911 | -0.105182 | -0.904033 |
| H | 1.137660  | -3.517845 | -0.021540 | C     | -3.925390 | -1.273757 | -0.348988 |
| H | 0.224720  | -3.169625 | -1.506122 | O     | -3.529537 | 0.508368  | -1.883526 |
| H | 1.781674  | -4.022736 | -1.596276 | O     | -4.310385 | -2.215826 | 1.812512  |
| H | 1.181262  | 1.307547  | 2.033301  | C     | -5.417832 | -0.897356 | -0.350386 |
| H | -1.222191 | 1.648517  | 1.214274  | C     | -3.702241 | -2.484574 | -1.304847 |
| H | -0.714540 | 0.042979  | 1.765027  | C     | -2.020636 | -1.052670 | 2.960818  |
| H | 1.079384  | 2.474195  | -0.789511 | C     | -1.411397 | -2.998353 | 1.473542  |
| H | 0.341742  | 3.266416  | 0.598670  | C     | -0.923664 | 1.282122  | -0.967698 |
| H | 3.318606  | 2.607675  | 0.442217  | C     | 0.557803  | 0.834501  | -0.961573 |
| H | 3.618070  | 5.018844  | -0.157694 | C     | -1.152559 | 2.665347  | -0.298790 |
| H | 2.690344  | 4.159352  | -1.397848 | C     | -2.496843 | 3.372702  | -0.574685 |
| H | 1.862052  | 5.221070  | -0.248443 | C     | -2.672259 | 4.550177  | 0.396914  |
| H | 2.511536  | 2.954444  | 2.775608  | C     | -2.613952 | 3.858432  | -2.025952 |
| H | 3.513581  | 4.312372  | 2.256597  | O     | 0.021108  | -0.549941 | 1.042062  |
| H | 1.751941  | 4.486417  | 2.296600  | C     | 1.085209  | 0.269095  | 0.366584  |
| H | -0.294886 | 1.419564  | -1.936596 | C     | 1.399756  | 1.321444  | 1.469729  |
| H | -1.814582 | 0.601131  | -2.339298 | C     | 2.209835  | 2.587250  | 1.089134  |
| H | -2.256902 | 2.936543  | -2.278699 | C     | 3.417283  | 2.228396  | 0.272851  |
| H | -5.064161 | -1.032864 | -0.594040 | C     | 4.534812  | 1.631939  | 0.710597  |
| H | -3.270504 | 0.151244  | 1.587110  | C     | 5.368185  | 0.875428  | -0.293705 |
| H | -2.639208 | -1.117745 | -1.135556 | C     | 4.854108  | -0.580084 | -0.406118 |
| H | -5.341866 | 1.590912  | 0.979337  | C     | 3.392911  | -0.780038 | -0.854758 |
| H | -6.413796 | 1.016726  | -0.309394 | C     | 2.184757  | -0.832232 | 0.169351  |
| H | -5.618688 | -0.847104 | 1.061584  | C     | 3.027255  | -2.248044 | -1.311640 |
| H | -5.144374 | -3.060707 | 1.587819  | C     | 1.686964  | -2.123321 | -0.540845 |
| H | -4.329173 | -3.235415 | 0.024890  | C     | 3.905550  | -3.357477 | -0.718014 |
| H | -3.751762 | -4.137224 | 1.429915  | C     | 2.906385  | -2.432249 | -2.824785 |
| H | -2.653368 | -2.983242 | 3.383547  | C     | 4.915279  | 1.476701  | 2.161400  |
| H | -2.281856 | -1.252705 | 3.308096  | H     | -6.028126 | -1.750031 | -0.039387 |
| H | -3.956314 | -1.790527 | 3.517200  | H     | -5.720482 | -0.590912 | -1.354896 |
| H | -1.747325 | -3.024198 | 0.064884  | H     | -5.619050 | -0.066407 | 0.337105  |
| H | -0.983907 | -1.993783 | 1.281417  | H     | -4.269196 | -3.354884 | -0.953213 |



|   |           |           |           |   |           |           |           |
|---|-----------|-----------|-----------|---|-----------|-----------|-----------|
| H | -4.056625 | -2.215443 | -2.306690 | C | 3.857460  | -1.548837 | -0.583543 |
| H | -2.645063 | -2.763658 | -1.381698 | C | 2.415365  | -1.953658 | -0.923042 |
| H | -2.612037 | -1.715790 | 3.598419  | C | 1.421918  | -0.828089 | -0.661953 |
| H | -0.994688 | -1.019149 | 3.338820  | C | 1.704571  | 0.366236  | -0.059032 |
| H | -2.447448 | -0.043848 | 3.023461  | C | 2.946928  | 0.500111  | 0.686044  |
| H | -1.376418 | -3.414856 | 0.460515  | C | 4.147971  | -0.417061 | 0.401905  |
| H | -0.391731 | -2.966280 | 1.868389  | O | 3.082129  | 1.363774  | 1.564769  |
| H | -2.008440 | -3.669142 | 2.101321  | O | 4.785337  | -2.184205 | -1.063028 |
| H | -1.211547 | 1.371739  | -2.024896 | C | 5.273193  | 0.473340  | -0.182529 |
| H | 1.204406  | 1.677461  | -1.268553 | C | 4.636190  | -1.056614 | 1.727013  |
| H | 0.661291  | 0.060176  | -1.744947 | C | 2.354698  | -2.359803 | -2.415156 |
| H | -1.039672 | 2.557522  | 0.788061  | C | 2.069215  | -3.190676 | -0.045119 |
| H | -0.346533 | 3.339970  | -0.628644 | C | 0.657710  | 1.464225  | 0.049852  |
| H | -3.314049 | 2.663056  | -0.389935 | C | -0.574069 | 1.133177  | -0.816089 |
| H | -3.621817 | 5.072931  | 0.224591  | C | 1.240017  | 2.832512  | -0.399425 |
| H | -2.662967 | 4.215099  | 1.442107  | C | 0.304766  | 4.053645  | -0.262367 |
| H | -1.865738 | 5.287769  | 0.280741  | C | -0.095492 | 4.327588  | 1.194706  |
| H | -2.564065 | 3.028615  | -2.738447 | C | 0.979944  | 5.291093  | -0.872982 |
| H | -3.568974 | 4.373483  | -2.191651 | O | 0.211749  | -1.182321 | -1.106297 |
| H | -1.810606 | 4.567403  | -2.270641 | C | -1.006007 | -0.333730 | -0.914249 |
| H | 0.435222  | 1.648728  | 1.902041  | C | -1.732171 | -0.597025 | -2.270061 |
| H | 1.938338  | 0.787535  | 2.278291  | C | -2.789674 | 0.427905  | -2.752478 |
| H | 2.478377  | 3.092958  | 2.028129  | C | -3.784130 | 0.706493  | -1.663607 |
| H | 5.017875  | -1.094500 | 0.552047  | C | -4.739488 | -0.125617 | -1.226639 |
| H | 3.169680  | -0.090037 | -1.679072 | C | -5.230338 | 0.048288  | 0.187950  |
| H | 2.564853  | -1.081483 | 1.171764  | C | -4.327645 | -0.764507 | 1.146665  |
| H | 5.301270  | 1.353966  | -1.281938 | C | -2.838431 | -0.373630 | 1.242155  |
| H | 6.432996  | 0.852440  | -0.013966 | C | -1.688565 | -0.987787 | 0.335135  |
| H | 5.494646  | -1.097750 | -1.137365 | C | -2.090408 | -0.956475 | 2.503201  |
| H | 4.916210  | -3.365567 | -1.144193 | C | -0.828143 | -1.140700 | 1.625118  |
| H | 4.003529  | -3.271960 | 0.370715  | C | -2.620854 | -2.310228 | 2.995964  |
| H | 3.454526  | -4.336809 | -0.926984 | C | -1.957889 | 0.009517  | 3.680654  |
| H | 2.498173  | -3.421602 | -3.073916 | C | -5.204390 | -1.360481 | -1.956477 |
| H | 2.244832  | -1.679885 | -3.272309 | H | 6.168177  | -0.126733 | -0.372718 |
| H | 3.884642  | -2.347412 | -3.318291 | H | 5.518436  | 1.267872  | 0.529175  |
| H | 1.431786  | -2.961959 | 0.115554  | H | 4.962973  | 0.938891  | -1.126844 |
| H | 0.836708  | -1.947521 | -1.208078 | H | 3.866359  | -1.691223 | 2.183389  |
| H | 5.933721  | 1.857780  | 2.332670  | H | 5.525288  | -1.669427 | 1.541950  |
| H | 4.241683  | 2.012253  | 2.838391  | H | 4.891190  | -0.265897 | 2.439490  |
| H | 4.929385  | 0.420612  | 2.469125  | H | 3.105945  | -3.128275 | -2.616219 |
| H | 1.573952  | 3.286959  | 0.533437  | H | 1.367412  | -2.756971 | -2.664583 |
| H | 3.280371  | 2.278221  | -0.809255 | H | 2.559206  | -1.501913 | -3.067809 |
|   |           |           |           | H | 2.110475  | -2.957077 | 1.025184  |
|   |           |           |           | H | 1.059989  | -3.542438 | -0.282565 |

RB\_56

|       |           |           |           |   |           |           |           |
|-------|-----------|-----------|-----------|---|-----------|-----------|-----------|
| H     | 2.778703  | -4.000182 | -0.251348 | O | 5.088724  | -1.725798 | -0.219614 |
| H     | 0.365206  | 1.554249  | 1.108643  | C | 4.604549  | 1.363764  | -0.709633 |
| H     | -0.346820 | 1.466389  | -1.849764 | C | 5.120756  | 0.398236  | 1.566160  |
| H     | -1.440210 | 1.731010  | -0.478648 | C | 3.124256  | -1.527173 | -2.475464 |
| H     | 2.150571  | 3.037394  | 0.175449  | C | 2.587856  | -2.993824 | -0.491018 |
| H     | 1.545446  | 2.740986  | -1.453886 | C | 0.275507  | 1.284017  | 0.182556  |
| H     | -0.614510 | 3.865800  | -0.836372 | C | -0.747622 | 0.821417  | -0.872519 |
| H     | -0.720633 | 5.226692  | 1.268571  | C | 0.528261  | 2.806522  | 0.010517  |
| H     | -0.664517 | 3.499461  | 1.632909  | C | -0.681021 | 3.736949  | 0.249691  |
| H     | 0.790845  | 4.488021  | 1.823620  | C | -1.193589 | 3.676797  | 1.696277  |
| H     | 0.327837  | 6.171882  | -0.814898 | C | -0.302546 | 5.179371  | -0.120178 |
| H     | 1.229866  | 5.131652  | -1.929624 | O | 0.524151  | -1.246383 | -1.244960 |
| H     | 1.912148  | 5.535556  | -0.345723 | C | -0.852654 | -0.685178 | -1.108710 |
| H     | -0.937597 | -0.651617 | -3.040960 | C | -1.400495 | -0.983204 | -2.535884 |
| H     | -2.201884 | -1.599390 | -2.219482 | C | -2.733833 | -0.315961 | -2.953593 |
| H     | -3.260691 | 0.007075  | -3.652402 | C | -3.755377 | -0.593316 | -1.896478 |
| H     | -4.412562 | -1.832697 | 0.899834  | C | -4.401881 | 0.274236  | -1.105325 |
| H     | -2.748995 | 0.721285  | 1.263744  | C | -4.974430 | -0.217354 | 0.213193  |
| H     | -2.007157 | -1.989428 | 0.006495  | C | -4.143907 | -1.343521 | 0.862275  |
| H     | -5.199217 | 1.108779  | 0.478643  | C | -2.635526 | -1.064930 | 1.040786  |
| H     | -6.270080 | -0.293341 | 0.309593  | C | -1.512067 | -1.542829 | 0.029371  |
| H     | -4.748848 | -0.658785 | 2.159367  | C | -1.904588 | -1.892531 | 2.164240  |
| H     | -3.602546 | -2.223814 | 3.476827  | C | -0.641482 | -1.912120 | 1.266056  |
| H     | -2.708205 | -3.044251 | 2.186221  | C | -2.462003 | -3.307993 | 2.370825  |
| H     | -1.929621 | -2.728757 | 3.739623  | C | -1.763803 | -1.186884 | 3.512652  |
| H     | -1.544205 | 0.975775  | 3.365952  | C | -4.533819 | 1.752666  | -1.369900 |
| H     | -2.932374 | 0.203054  | 4.150193  | H | 3.914670  | 1.401296  | -1.559838 |
| H     | -1.295623 | -0.397020 | 4.457439  | H | 4.676900  | 2.371952  | -0.283524 |
| H     | -0.287412 | -2.087012 | 1.740851  | H | 5.595384  | 1.067156  | -1.074180 |
| H     | -0.120461 | -0.323908 | 1.772845  | H | 4.820825  | -0.296387 | 2.359989  |
| H     | -6.300814 | -1.355840 | -2.053972 | H | 6.119435  | 0.113254  | 1.223554  |
| H     | -4.781378 | -1.446056 | -2.962654 | H | 5.167285  | 1.402407  | 1.995939  |
| H     | -4.950610 | -2.279409 | -1.407312 | H | 2.284014  | -1.970422 | -3.019419 |
| H     | -2.299091 | 1.357816  | -3.068186 | H | 3.283708  | -0.511499 | -2.857035 |
| H     | -3.557245 | 1.568563  | -1.033264 | H | 4.023922  | -2.118579 | -2.677150 |
|       |           |           |           | H | 3.477920  | -3.593947 | -0.700421 |
|       |           |           |           | H | 2.384302  | -3.046131 | 0.585255  |
| RB_57 |           |           |           | H | 1.738258  | -3.424374 | -1.027377 |
| C     | 4.092295  | -1.018688 | -0.236322 | H | -0.126433 | 1.112561  | 1.195794  |
| C     | 2.829475  | -1.533515 | -0.948021 | H | -0.465742 | 1.287459  | -1.840266 |
| C     | 1.596714  | -0.677733 | -0.678689 | H | -1.751141 | 1.203269  | -0.617891 |
| C     | 1.564394  | 0.483316  | 0.040536  | H | 1.328257  | 3.116862  | 0.691913  |
| C     | 2.731444  | 0.845234  | 0.838516  | H | 0.902563  | 2.972457  | -1.012395 |
| C     | 4.126743  | 0.371038  | 0.395891  | H | -1.503908 | 3.433911  | -0.414154 |
| O     | 2.635733  | 1.570458  | 1.835385  |   |           |           |           |

|   |           |           |           |
|---|-----------|-----------|-----------|
| H | -2.028636 | 4.373109  | 1.846541  |
| H | -1.550733 | 2.677711  | 1.971585  |
| H | -0.401574 | 3.950895  | 2.406512  |
| H | 0.023051  | 5.254485  | -1.165442 |
| H | -1.151055 | 5.862211  | 0.013898  |
| H | 0.519442  | 5.546750  | 0.509271  |
| H | -0.616031 | -0.666218 | -3.251665 |
| H | -1.499888 | -2.083571 | -2.634687 |
| H | -3.013649 | -0.740994 | -3.931744 |
| H | -4.286905 | -2.287118 | 0.317648  |
| H | -2.491534 | 0.001679  | 1.263209  |
| H | -1.847973 | -2.480004 | -0.439184 |
| H | -5.005537 | 0.636726  | 0.908503  |
| H | -6.023659 | -0.544391 | 0.110716  |
| H | -4.567798 | -1.518384 | 1.863384  |
| H | -3.437006 | -3.298604 | 2.873452  |
| H | -2.580305 | -3.853479 | 1.427134  |
| H | -1.776404 | -3.890576 | 3.000484  |
| H | -1.327636 | -0.186352 | 3.401555  |
| H | -2.737648 | -1.071130 | 4.008603  |
| H | -1.116238 | -1.756010 | 4.194004  |
| H | -0.090987 | -2.857865 | 1.209107  |
| H | 0.058884  | -1.122277 | 1.545700  |
| H | -5.596345 | 2.042809  | -1.369543 |
| H | -4.111955 | 2.056449  | -2.333474 |
| H | -4.055891 | 2.352446  | -0.580594 |
| H | -2.592807 | 0.760936  | -3.106925 |
| H | -3.801896 | -1.647531 | -1.620171 |

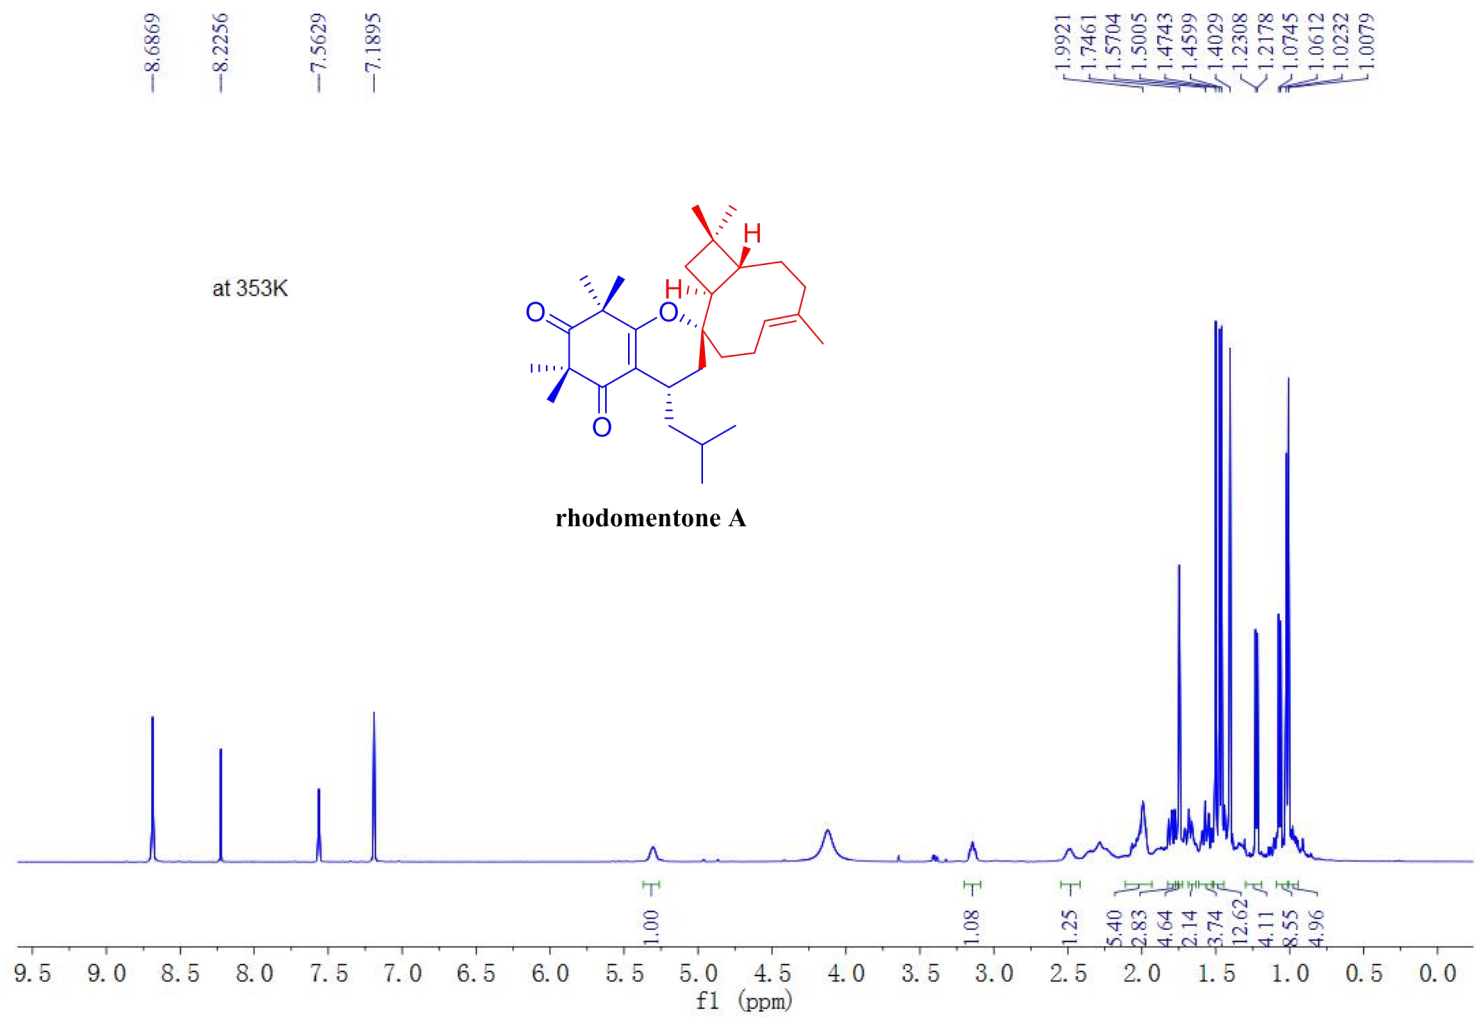

Figure S2. <sup>1</sup>H NMR spectrum (500 MHz, pyridine-*d*<sub>5</sub>, at 353K) of **1**.

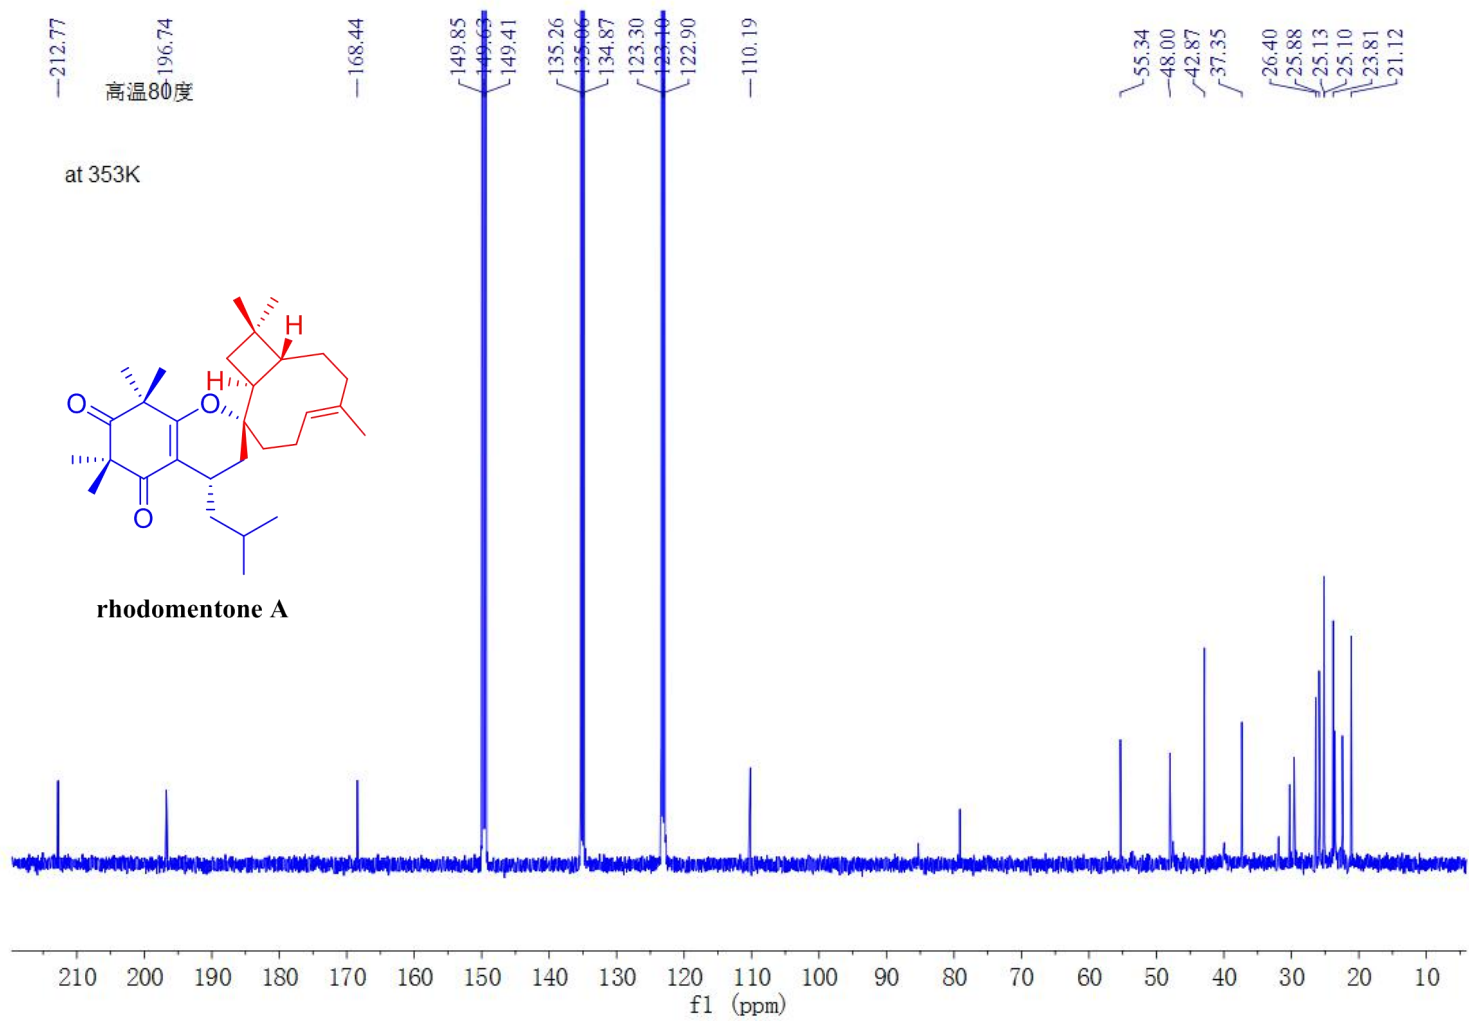

Figure S3.  $^{13}\text{C}$  NMR spectrum (125 MHz, pyridine- $d_5$ , at 353K) of **1**.

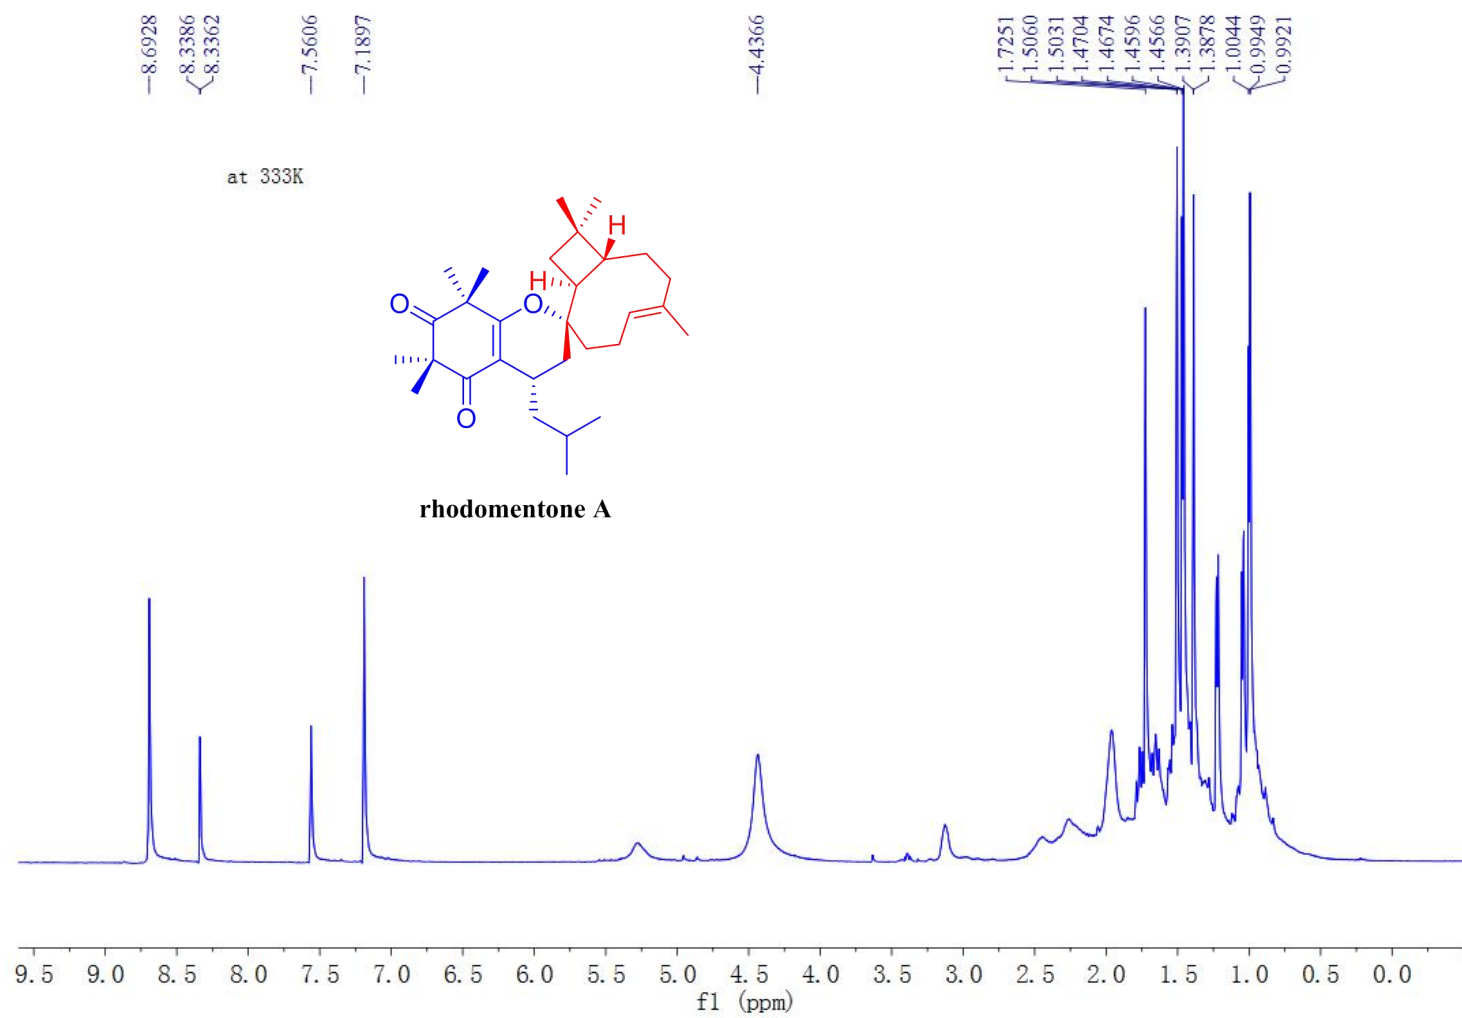

Figure S4.  $^1\text{H}$  NMR spectrum (500 MHz, pyridine- $d_5$ , at 333K) of **1**.

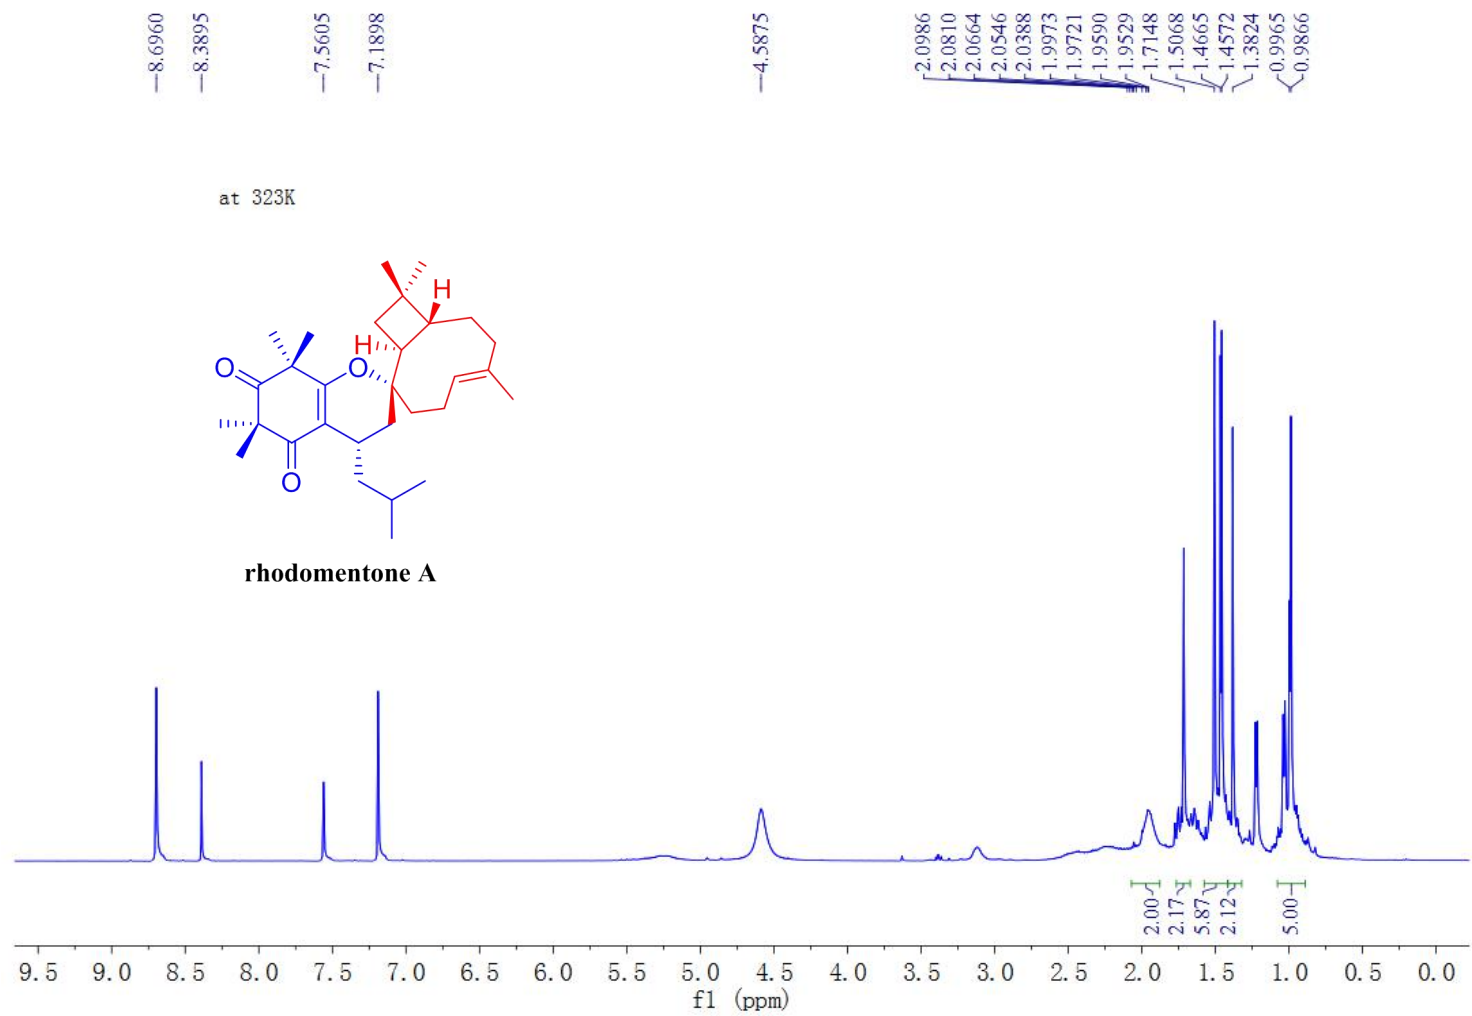

Figure S5. <sup>1</sup>H NMR spectrum (500 MHz, pyridine-*d*<sub>5</sub>, at 323K) of **1**.

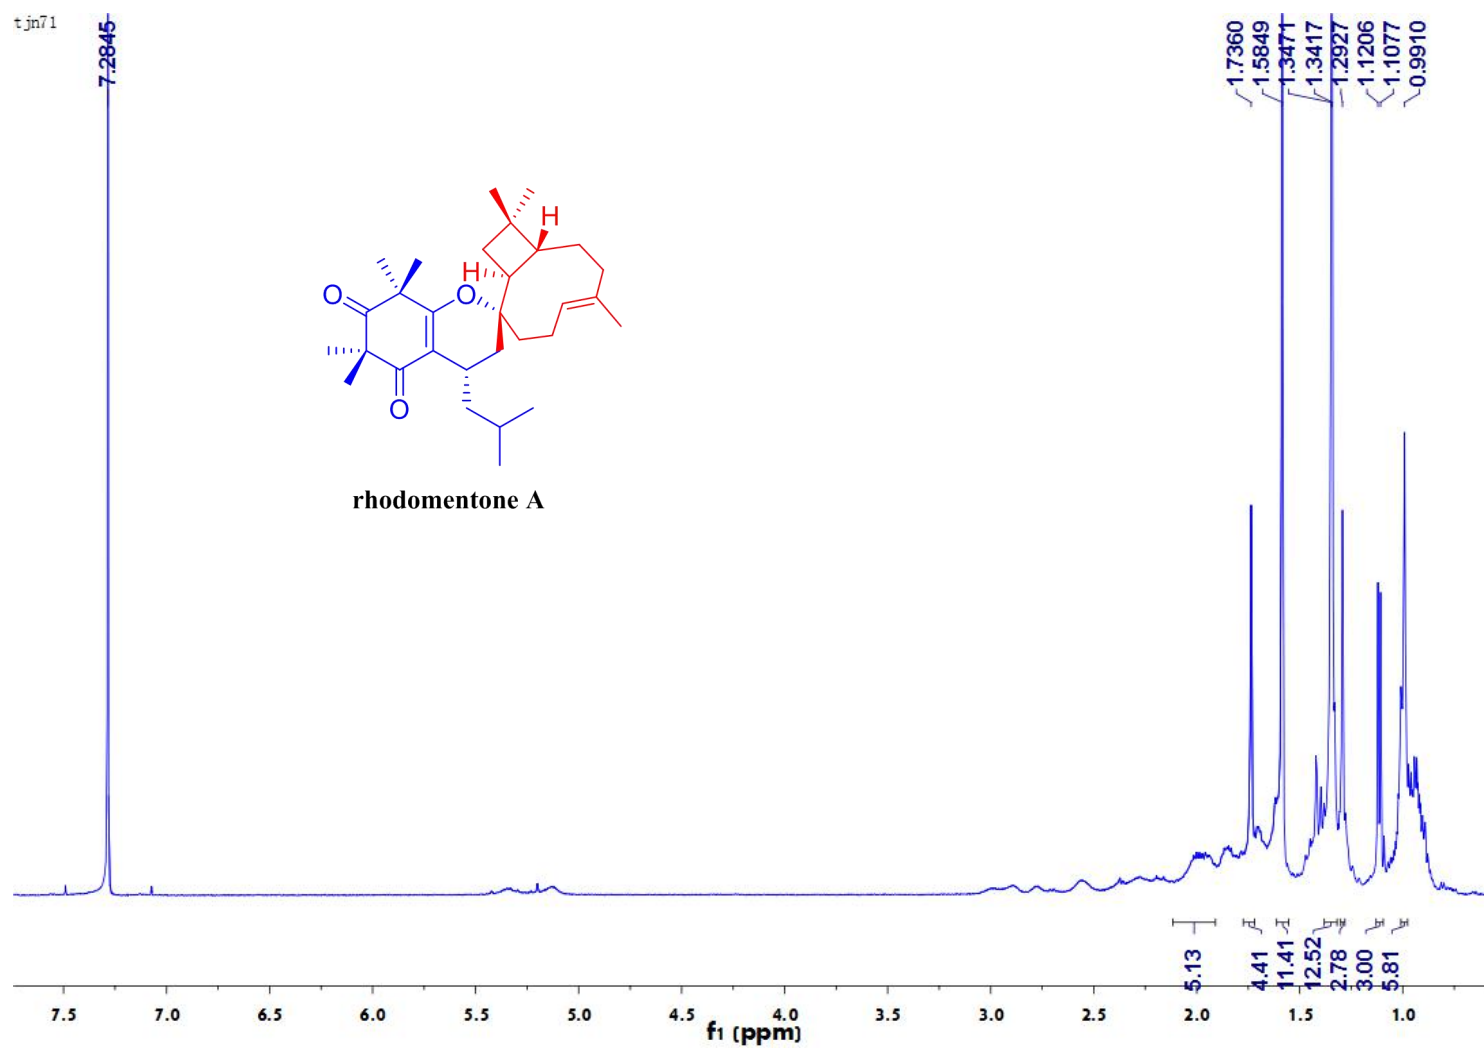

Figure S6. <sup>1</sup>H NMR spectrum (500 MHz, CDCl<sub>3</sub>, rt) of **1**.



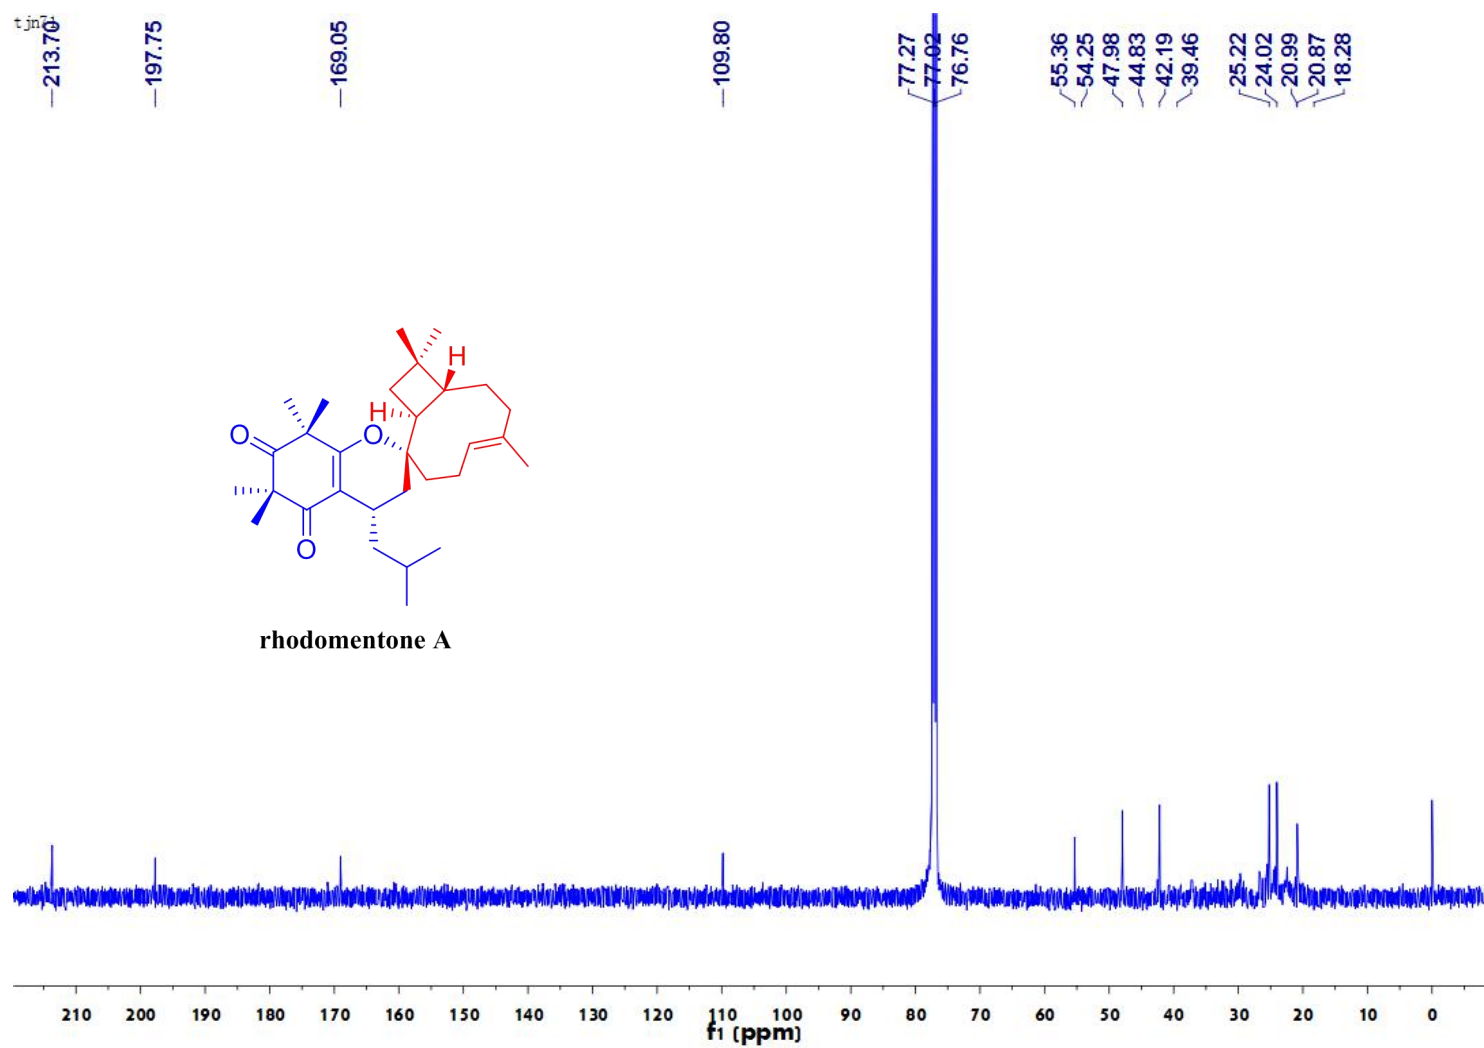

Figure S7.  $^{13}\text{C}$  NMR spectrum (125 MHz,  $\text{CDCl}_3$ , rt) of **1**.

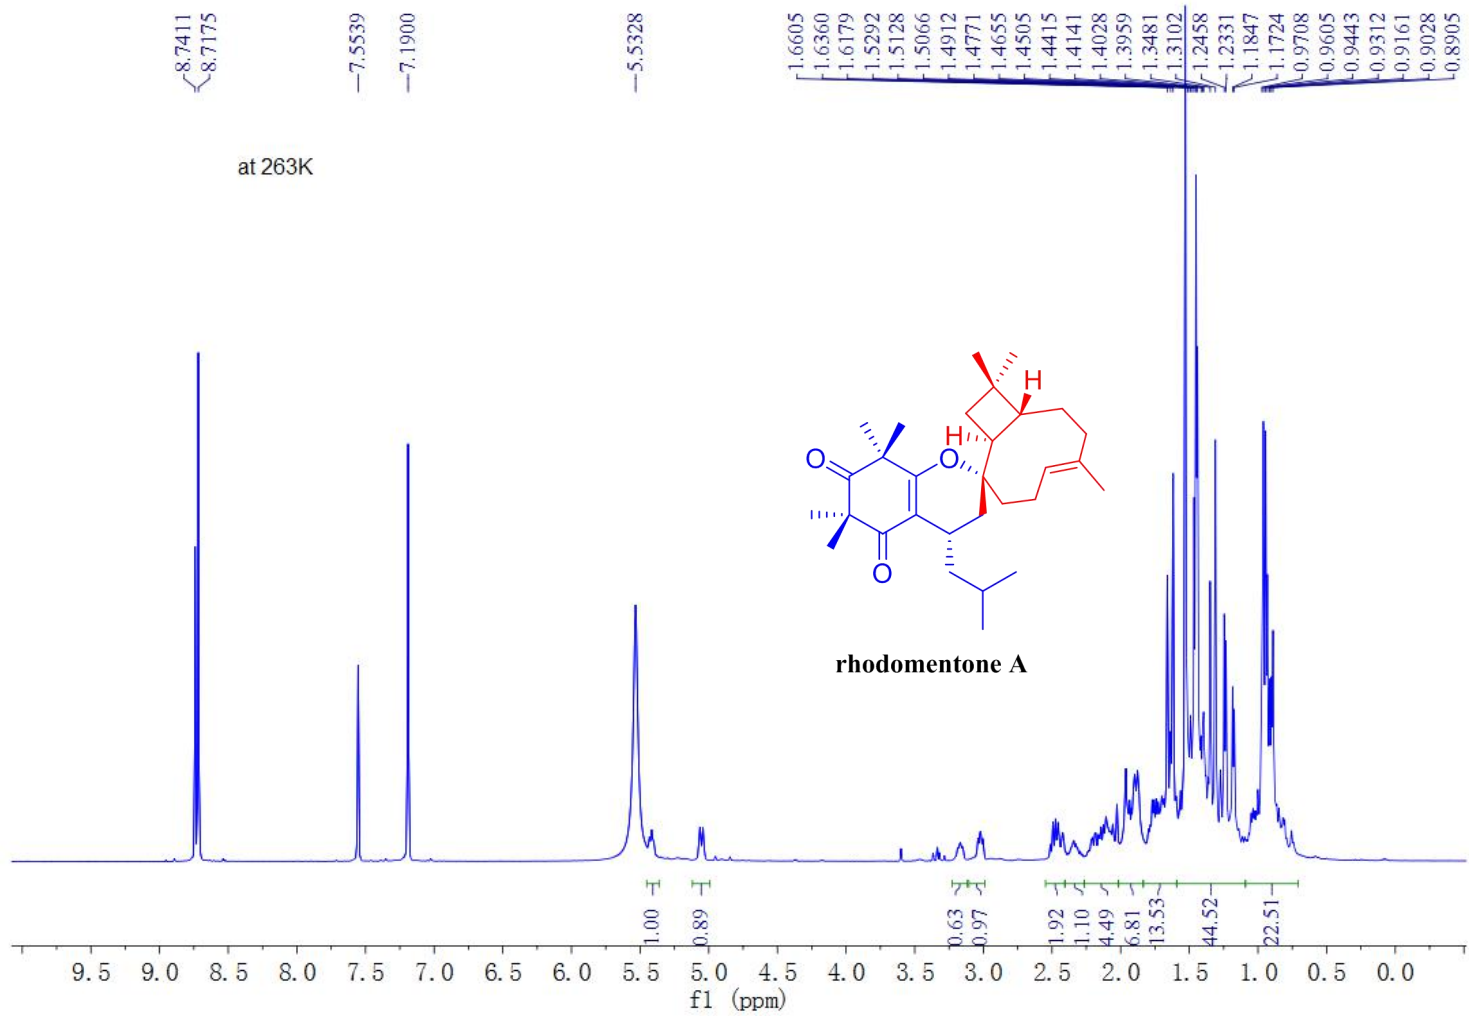

Figure S8.  $^1\text{H}$  NMR spectrum (500 MHz, pyridine- $d_5$ , at 263K) of **1**.

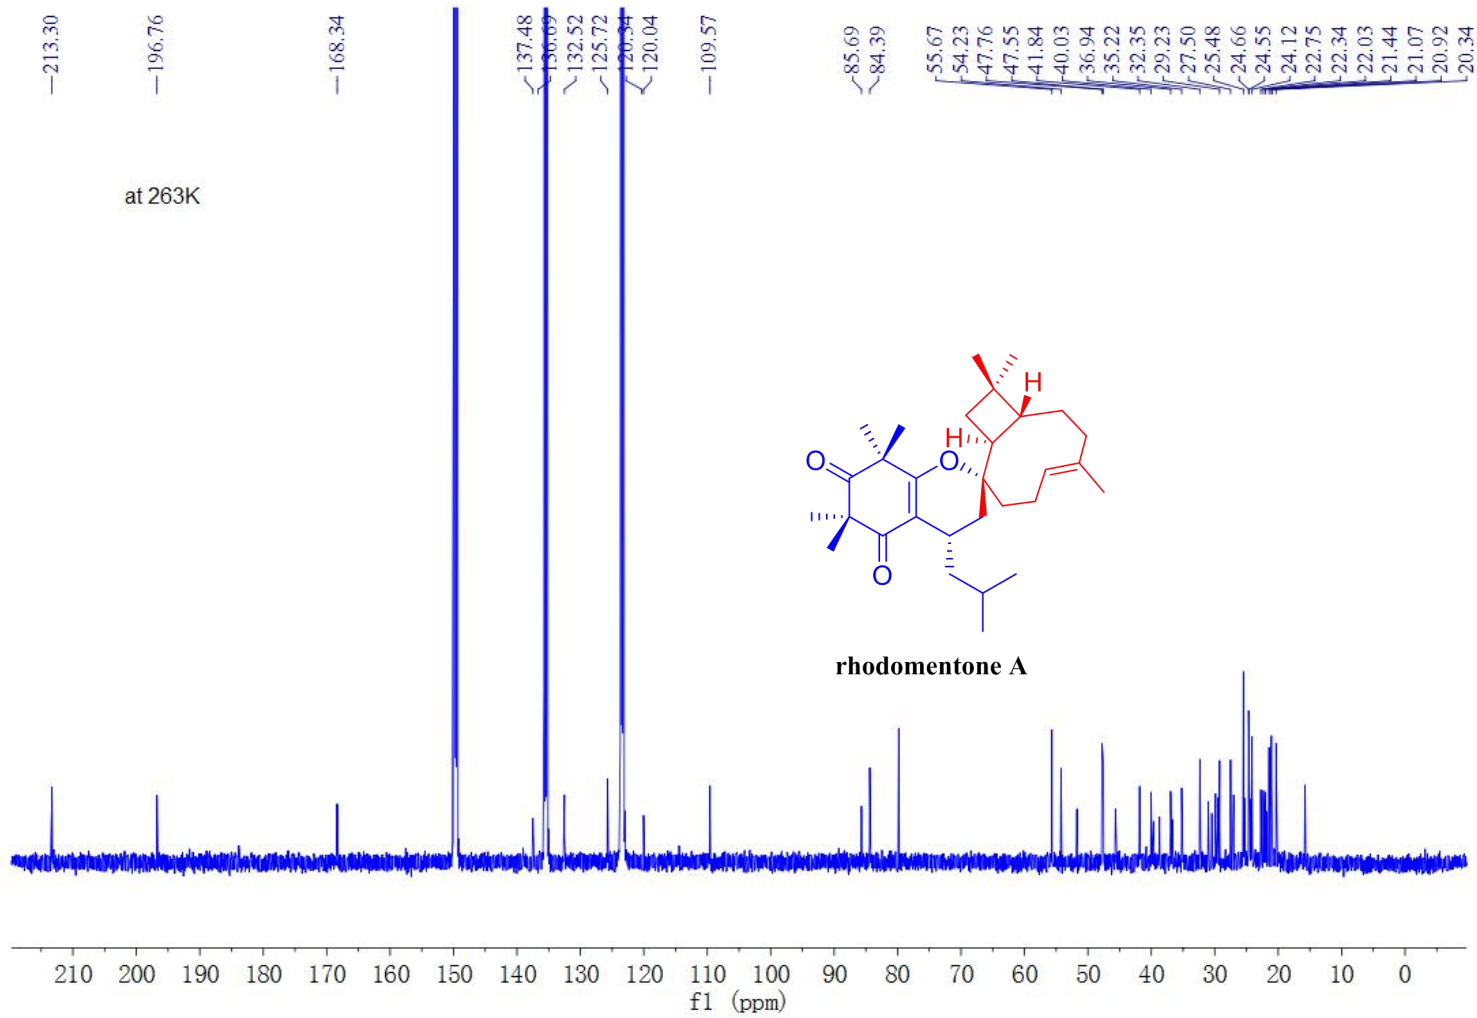

Figure S9.  $^{13}\text{C}$  NMR spectrum (125 MHz, pyridine- $d_5$ , at 263K) of **1**.

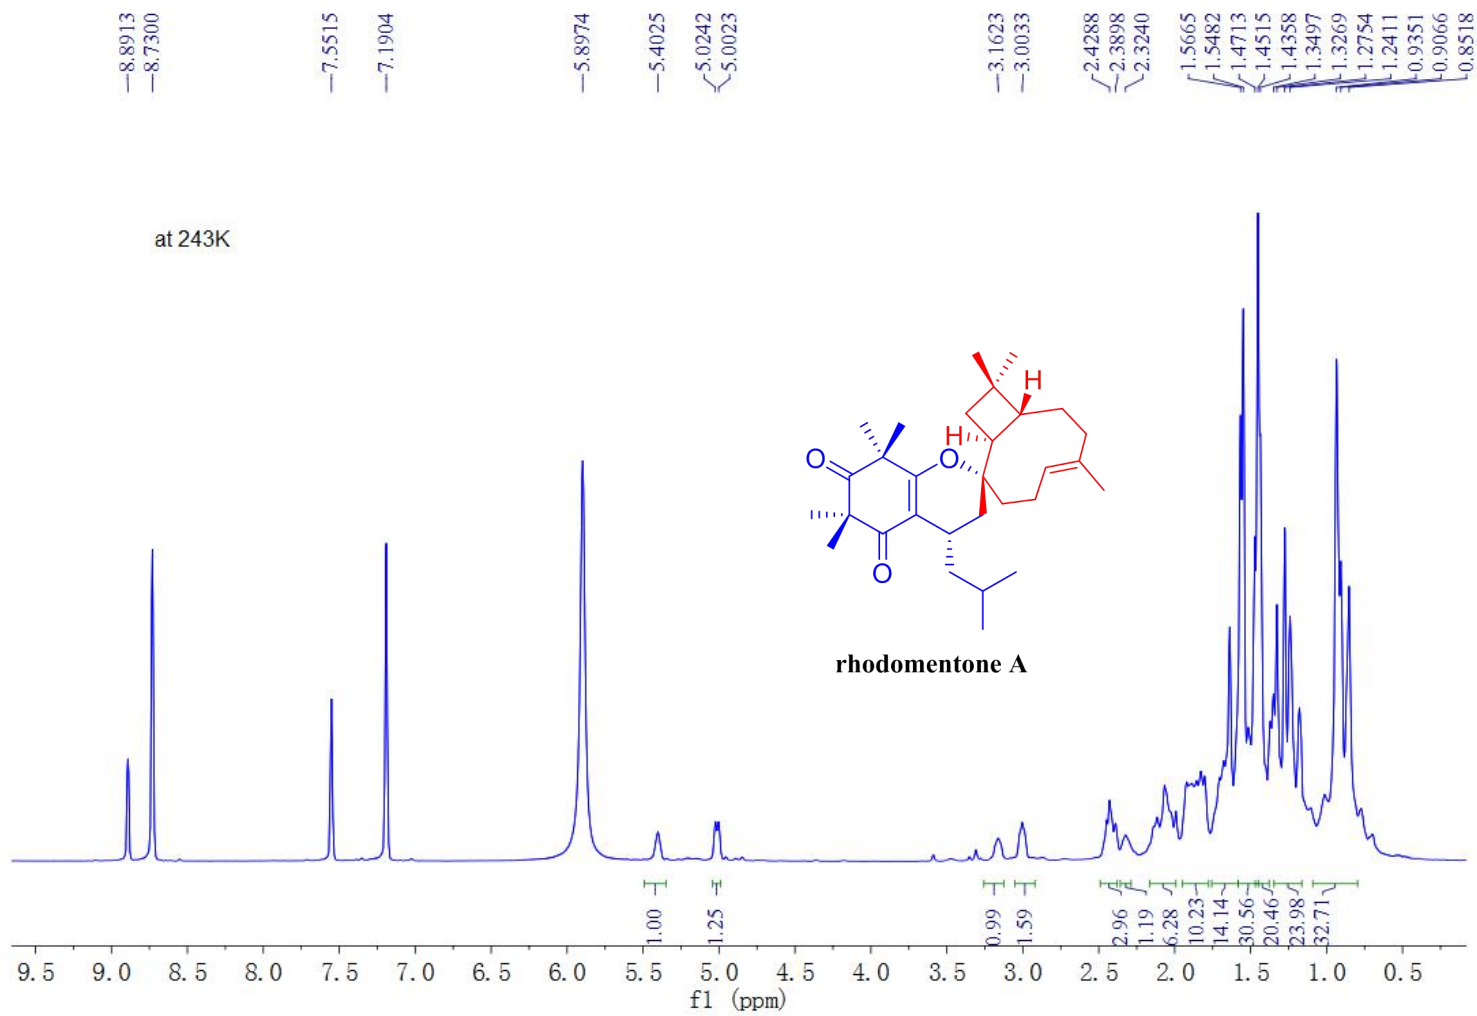

Figure S10.  $^1\text{H}$  NMR spectrum (500 MHz, pyridine- $d_5$ , at 243K) of **1**.

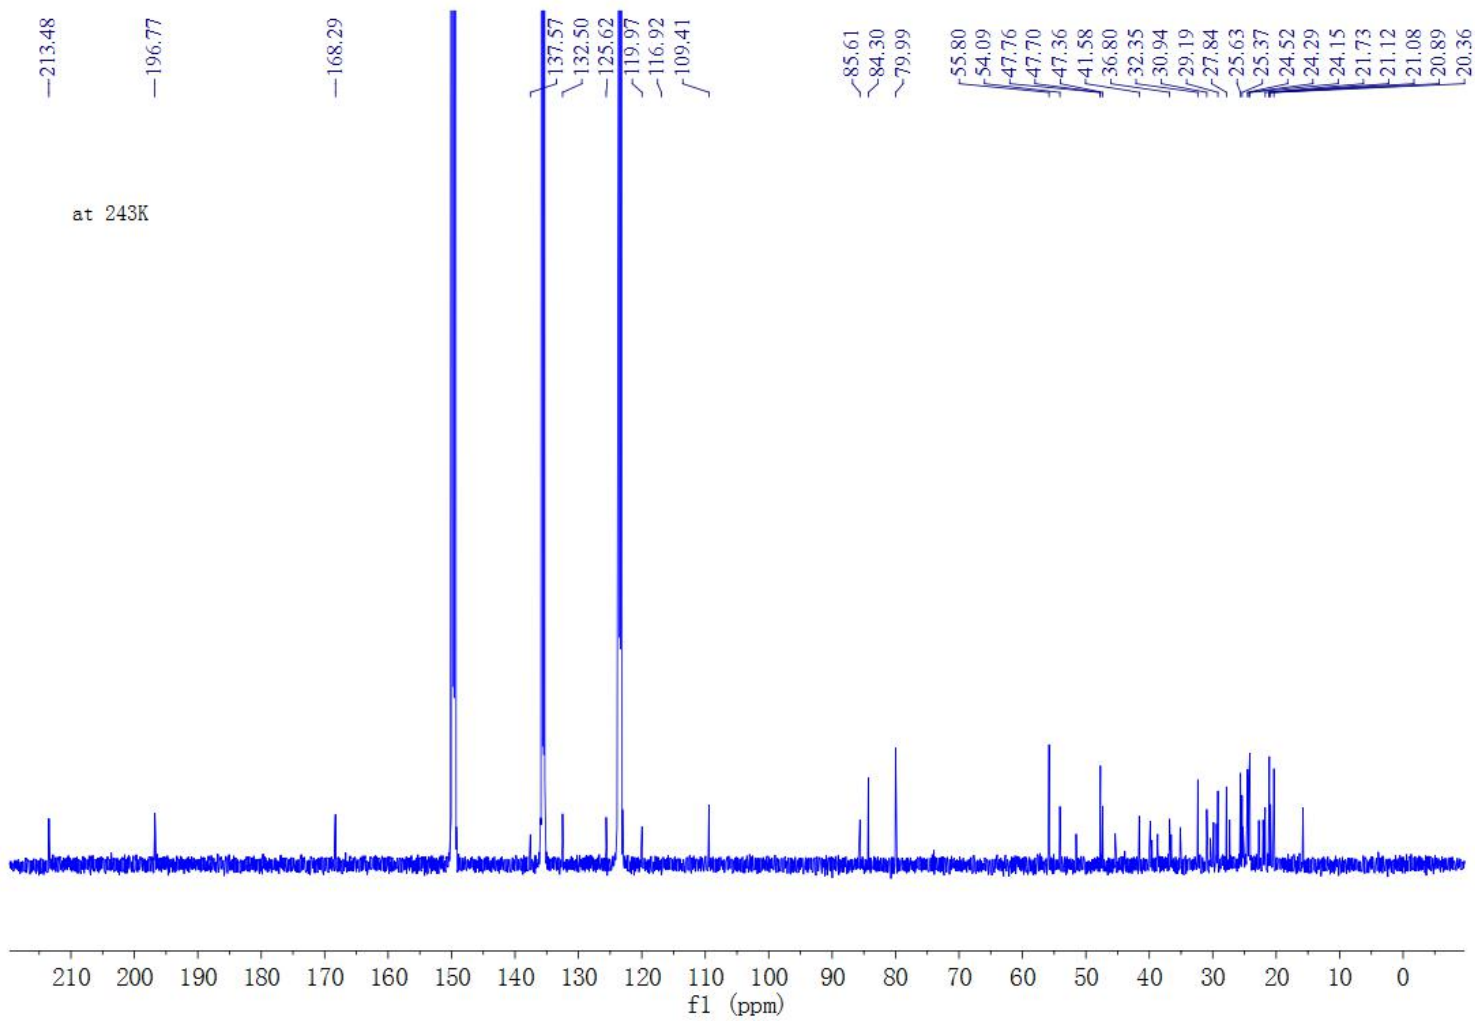

Figure S11.  $^{13}\text{C}$  NMR spectrum (125 MHz, pyridine- $d_5$ , at 243K) of **1**.

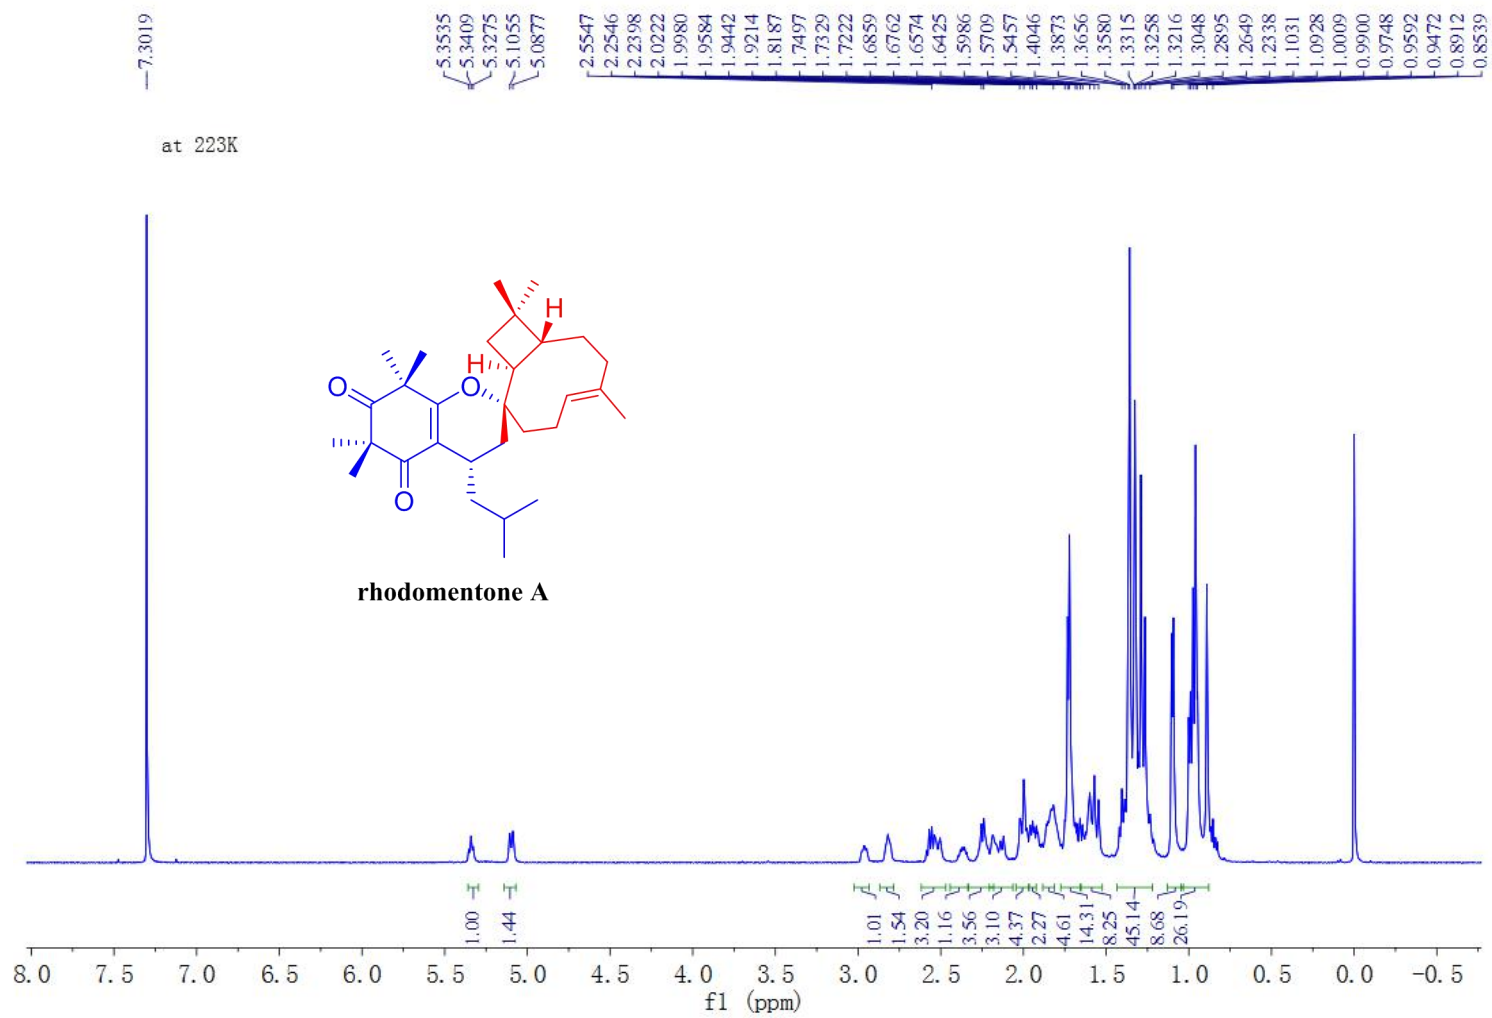

Figure S12.  $^1\text{H}$  NMR spectrum (500 MHz,  $\text{CDCl}_3$ , at 223K) of **1**.

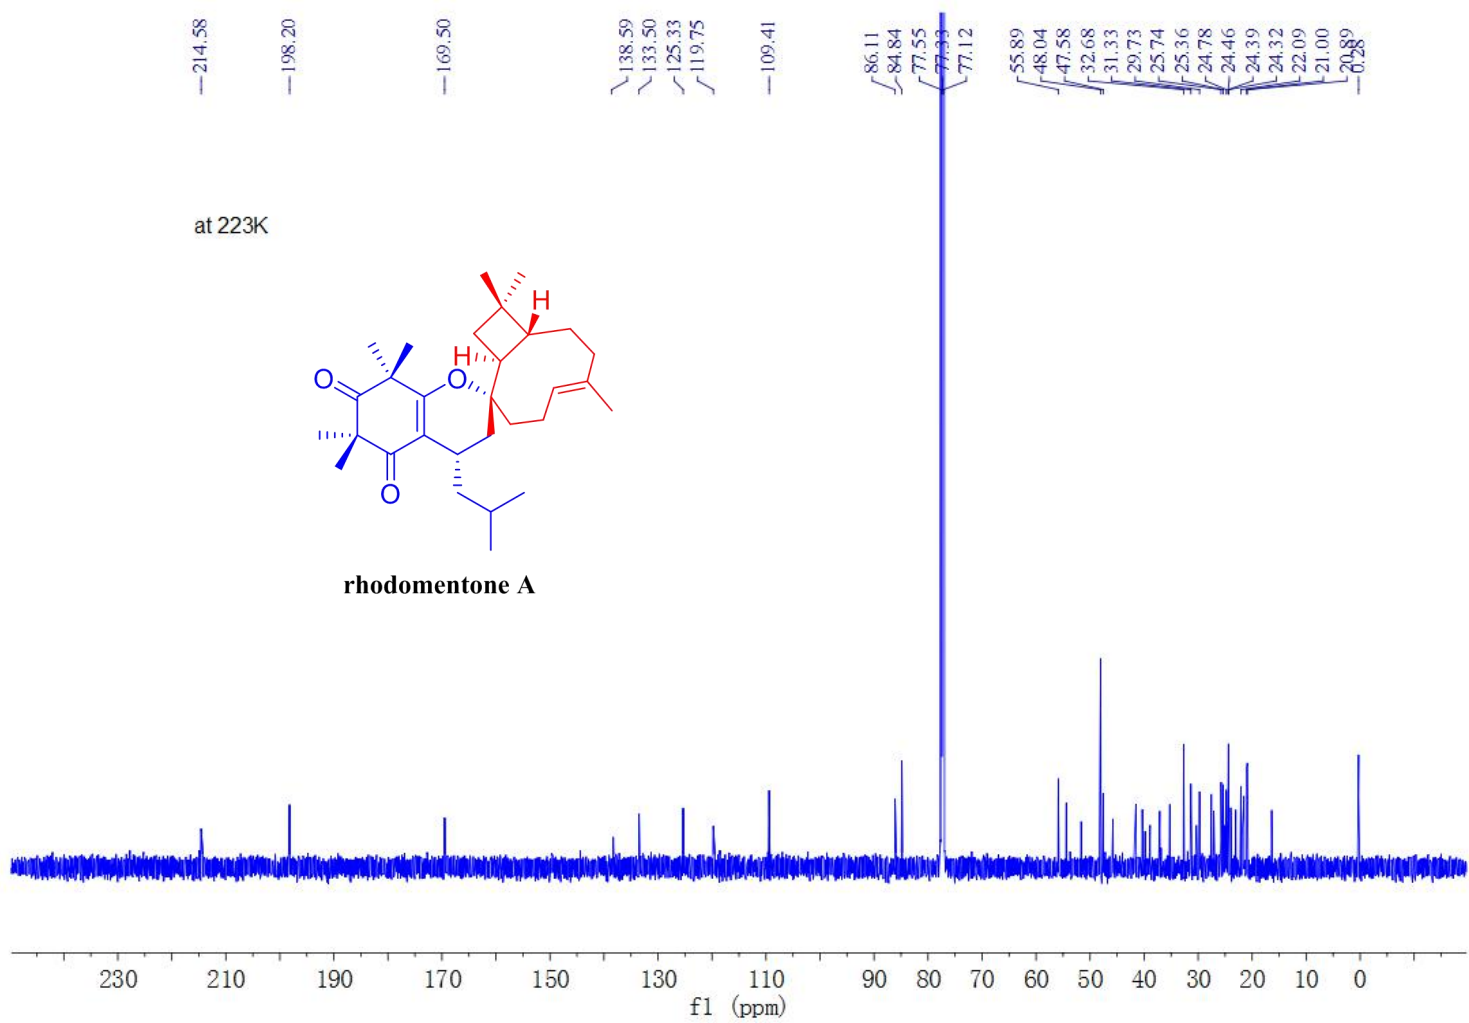

Figure S13.  $^{13}\text{C}$  NMR spectrum (125 MHz,  $\text{CDCl}_3$ , at 223K) of **1**.

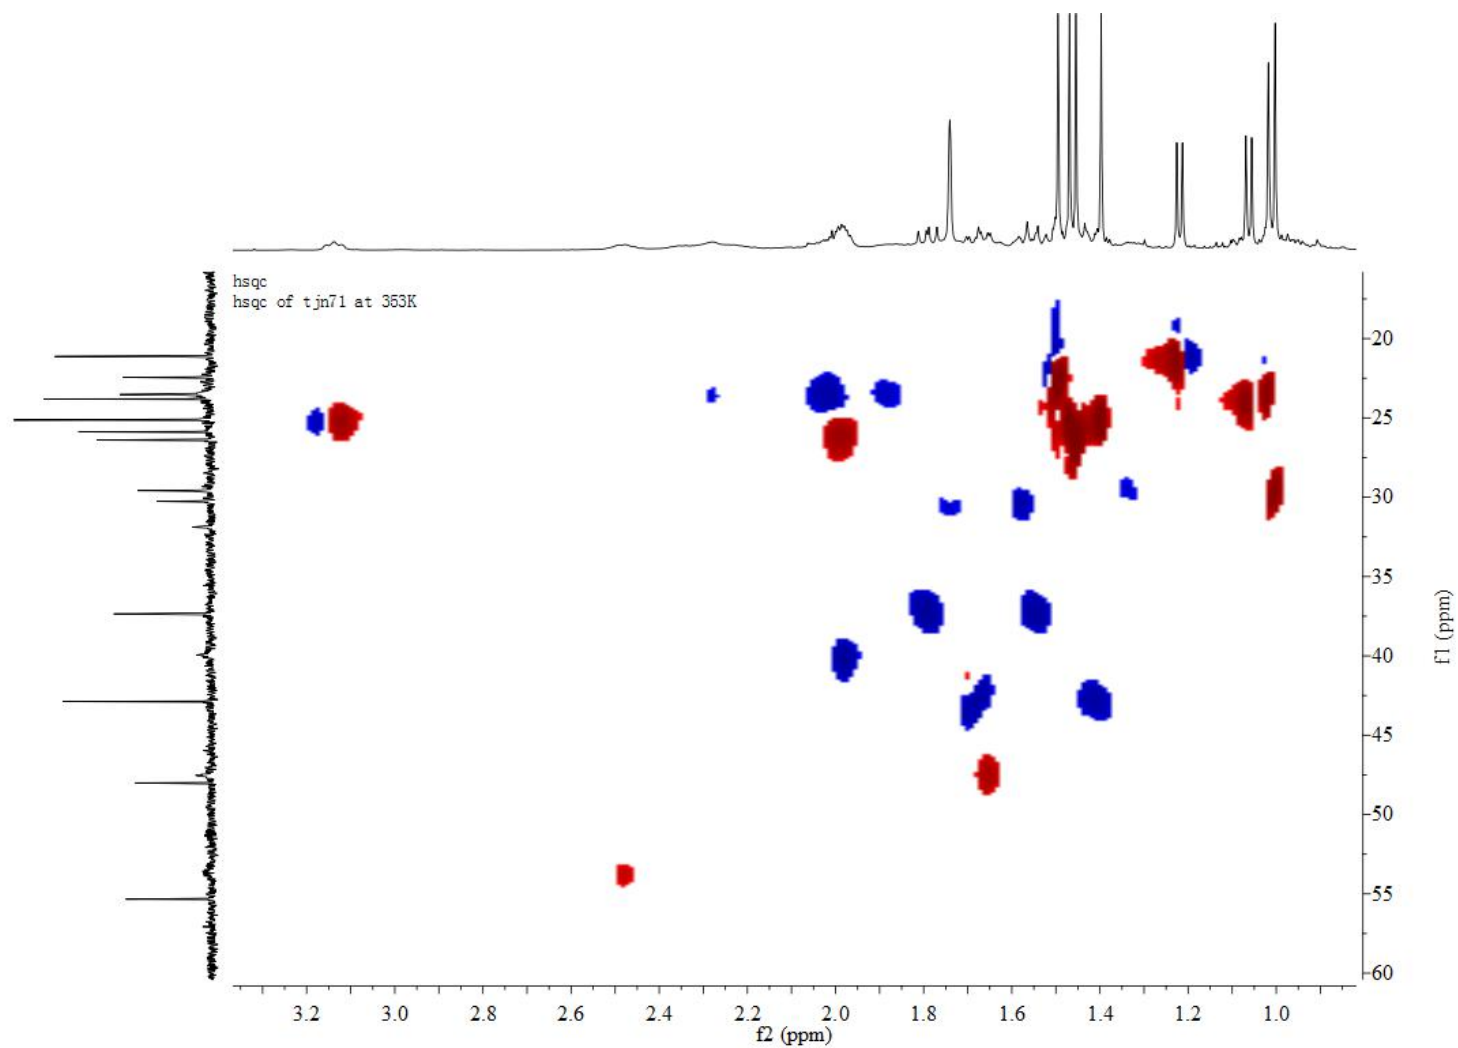

Figure S14. HSQC spectrum (500 MHz, pyridine- $d_5$ , at 353K) of **1**.



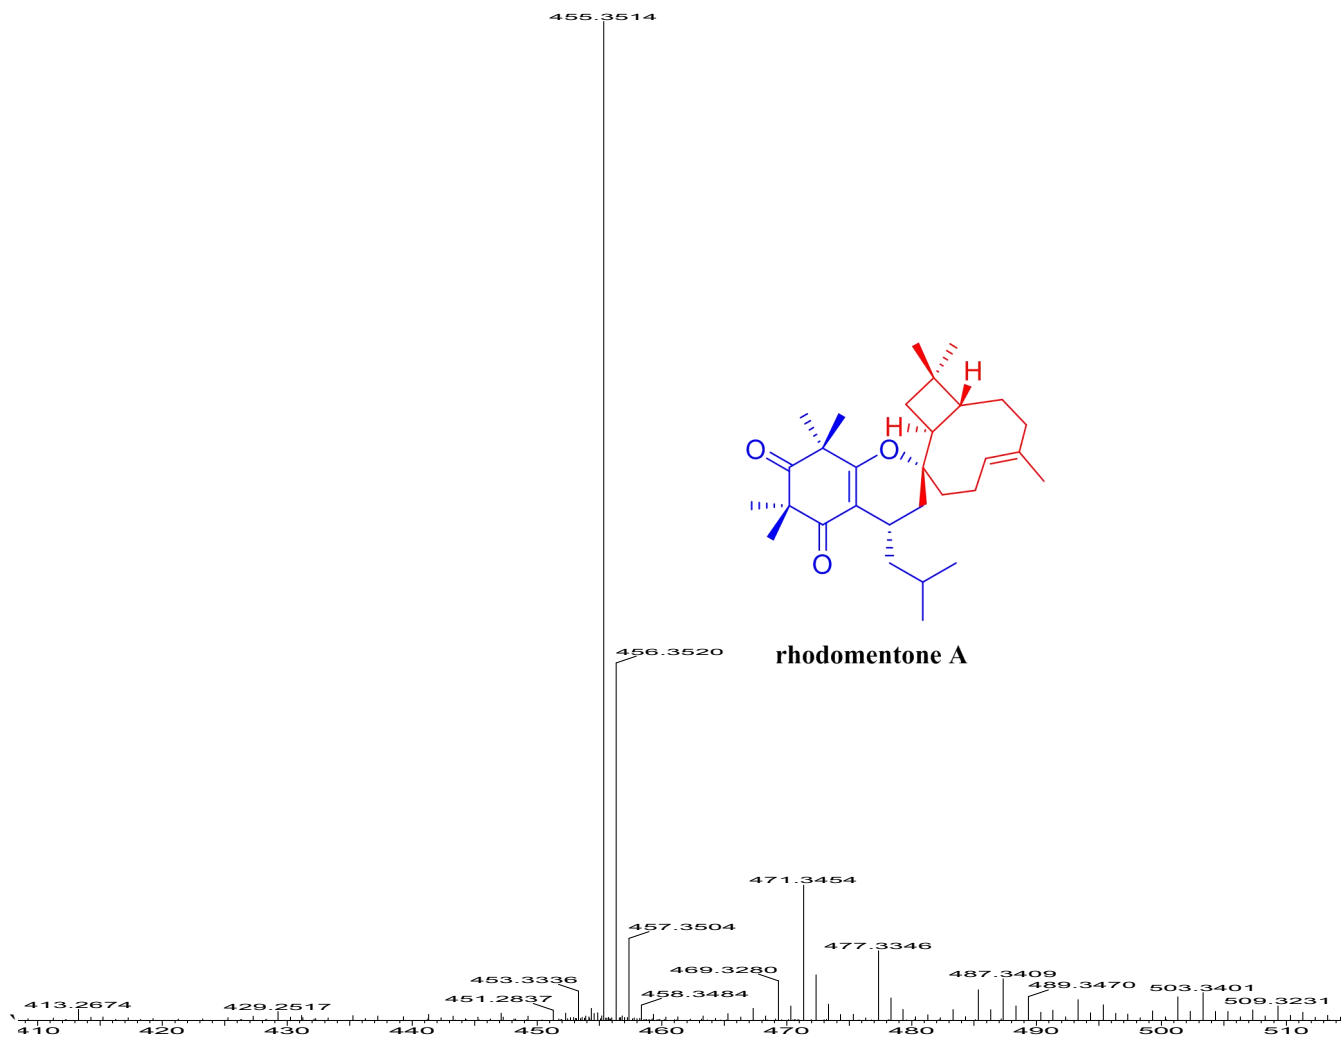

Figure S15. HRESIMS spectrum of **1**.

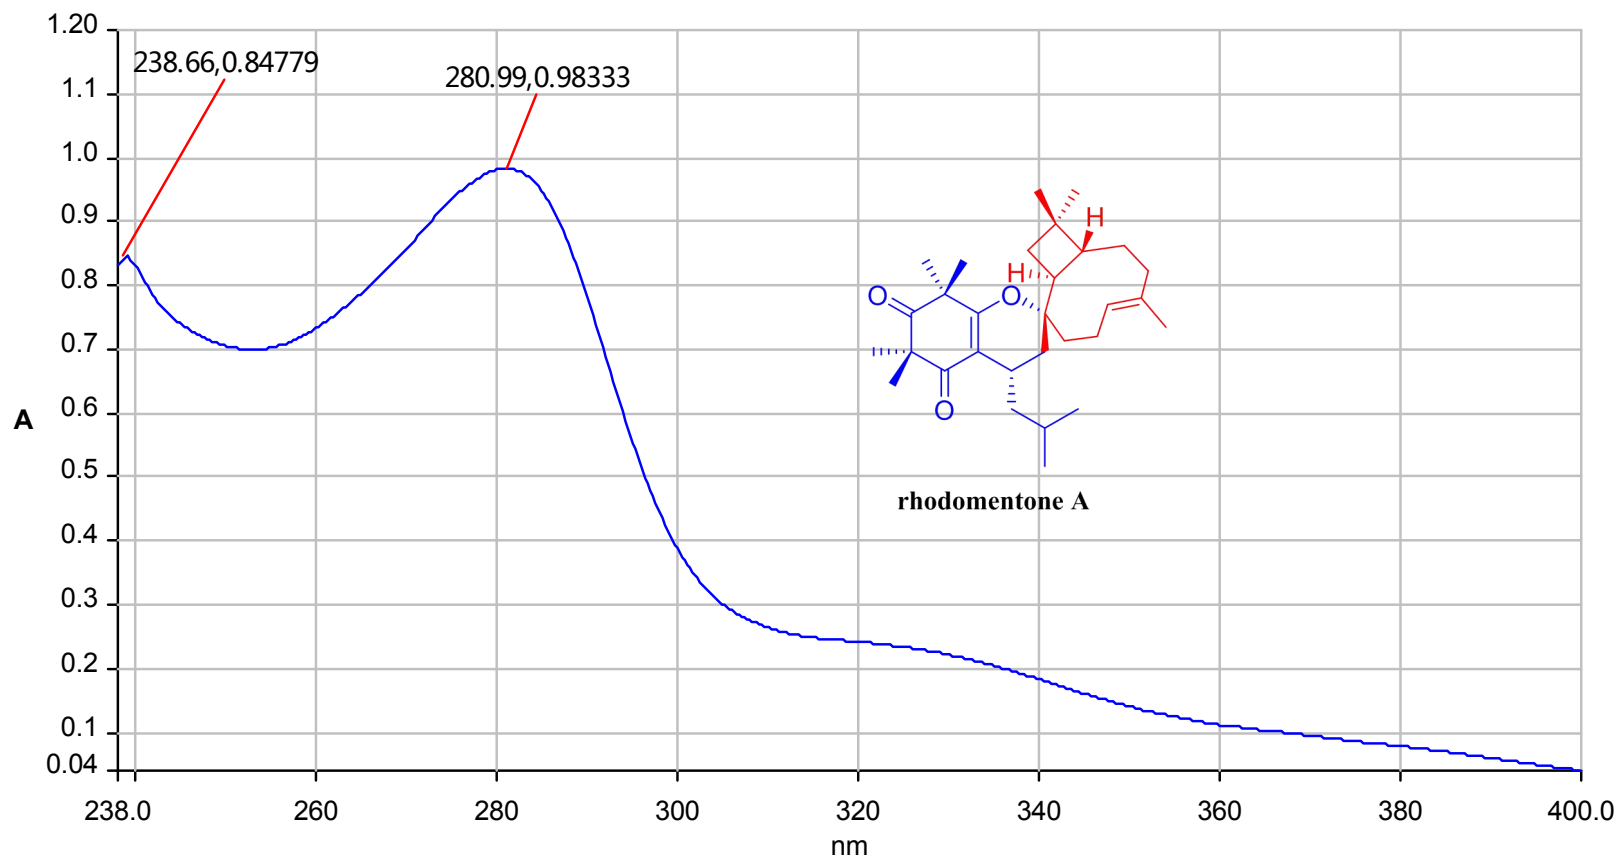

Figure S16. UV spectrum of **1**.

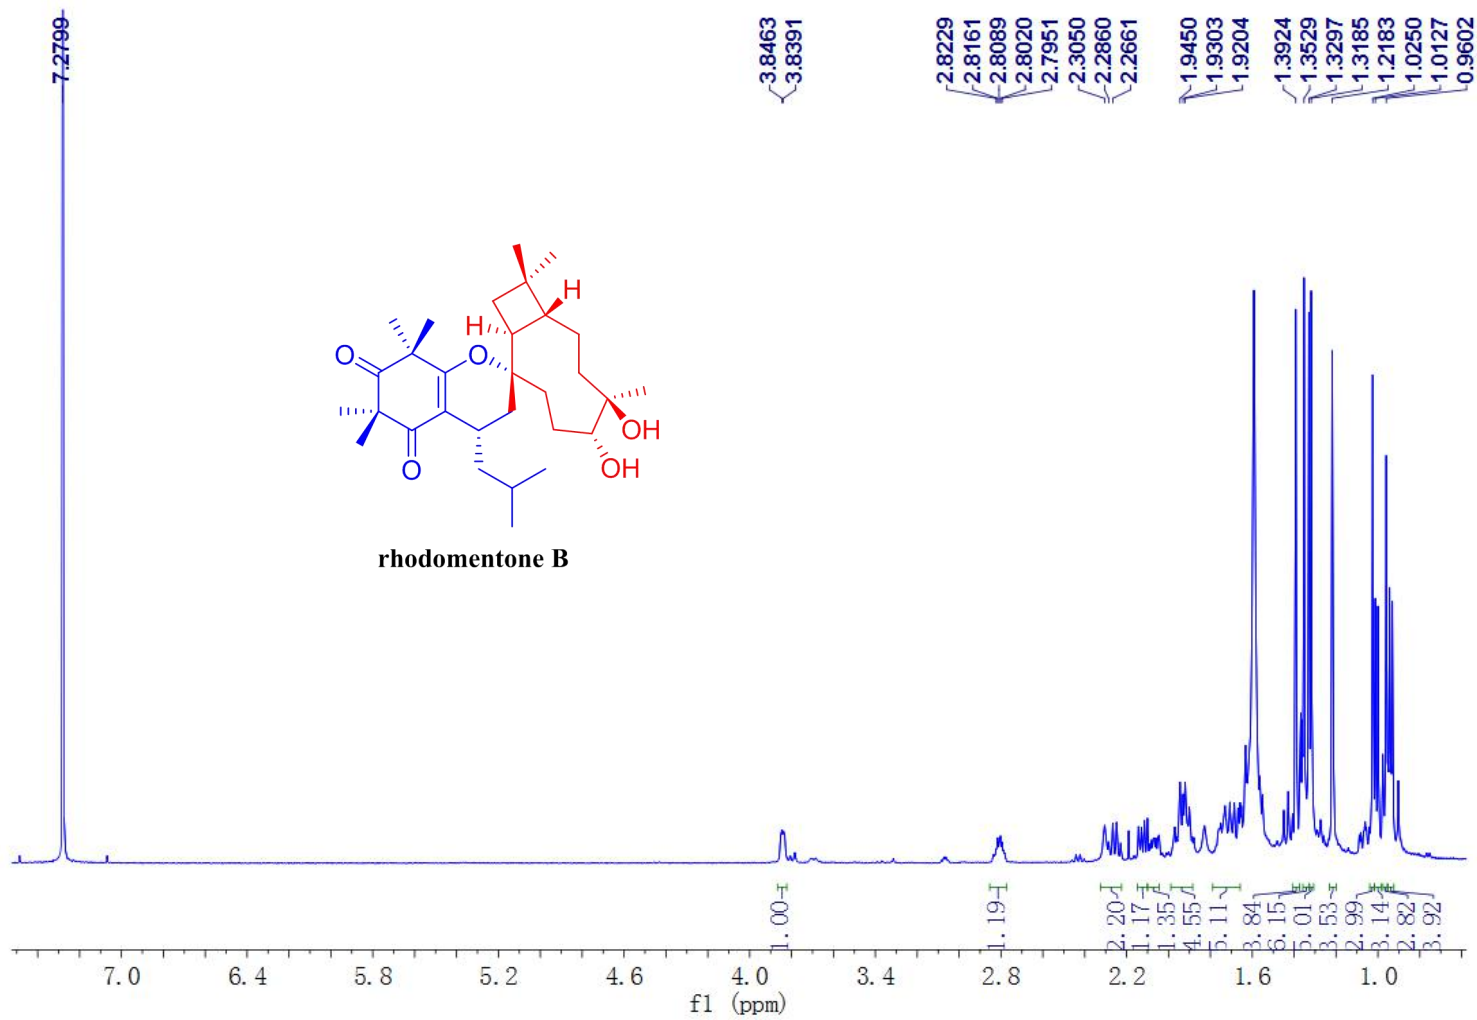

Figure S17.  $^1\text{H}$  NMR spectrum (500 MHz,  $\text{CDCl}_3$ ) of **2**.

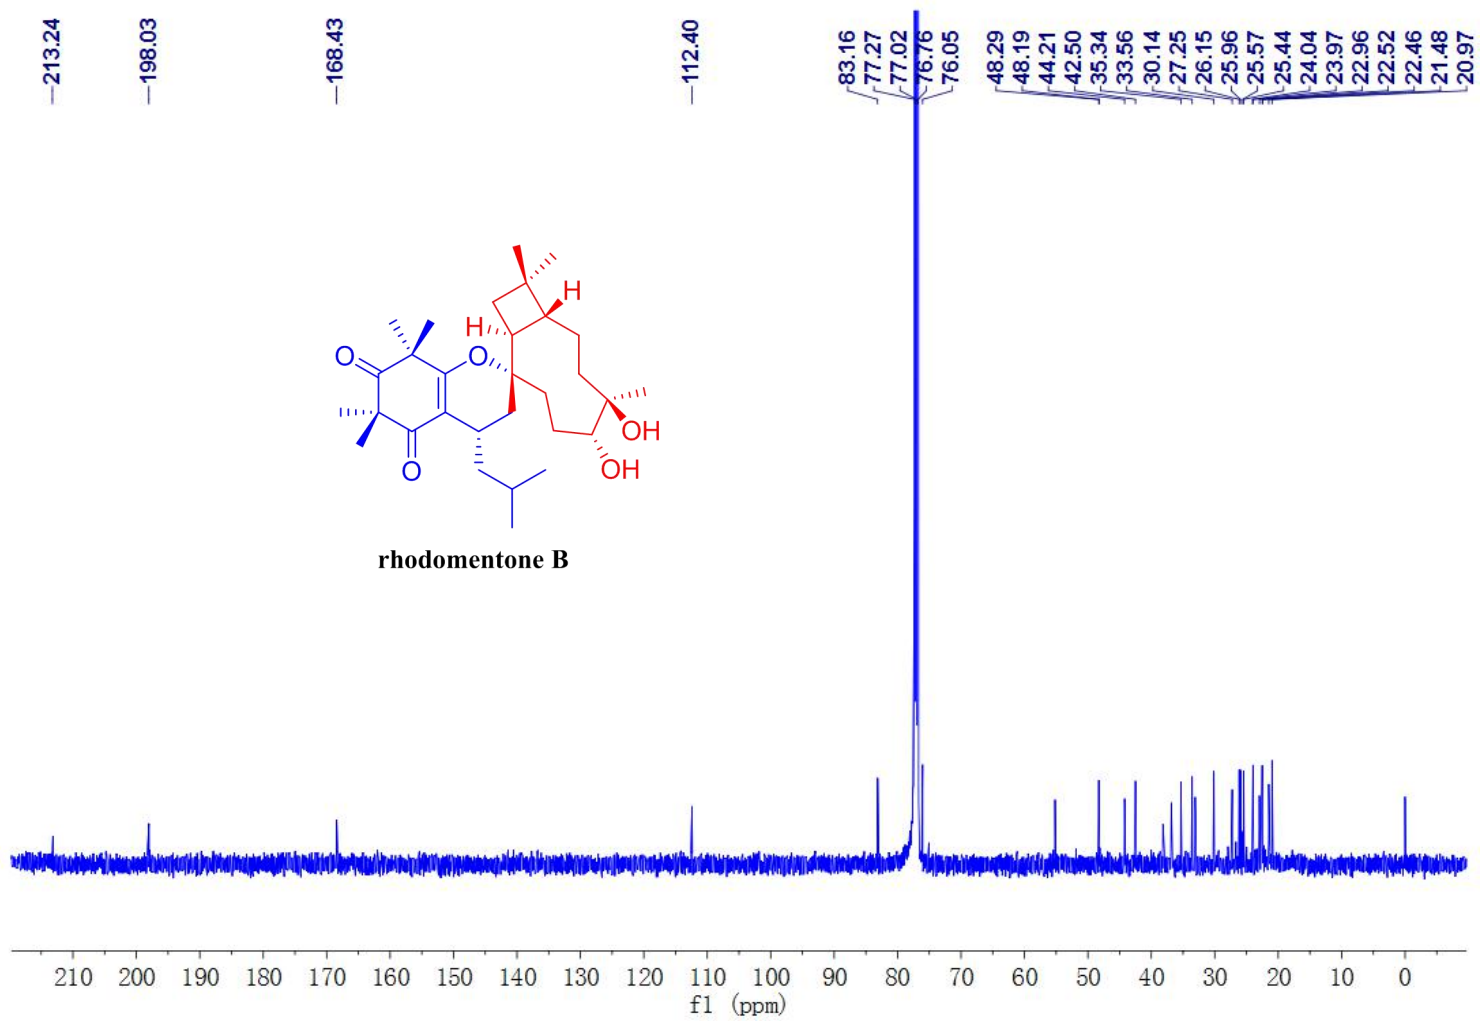

Figure S18.  $^{13}\text{C}$  NMR spectrum (125 MHz,  $\text{CDCl}_3$ ) of 2.

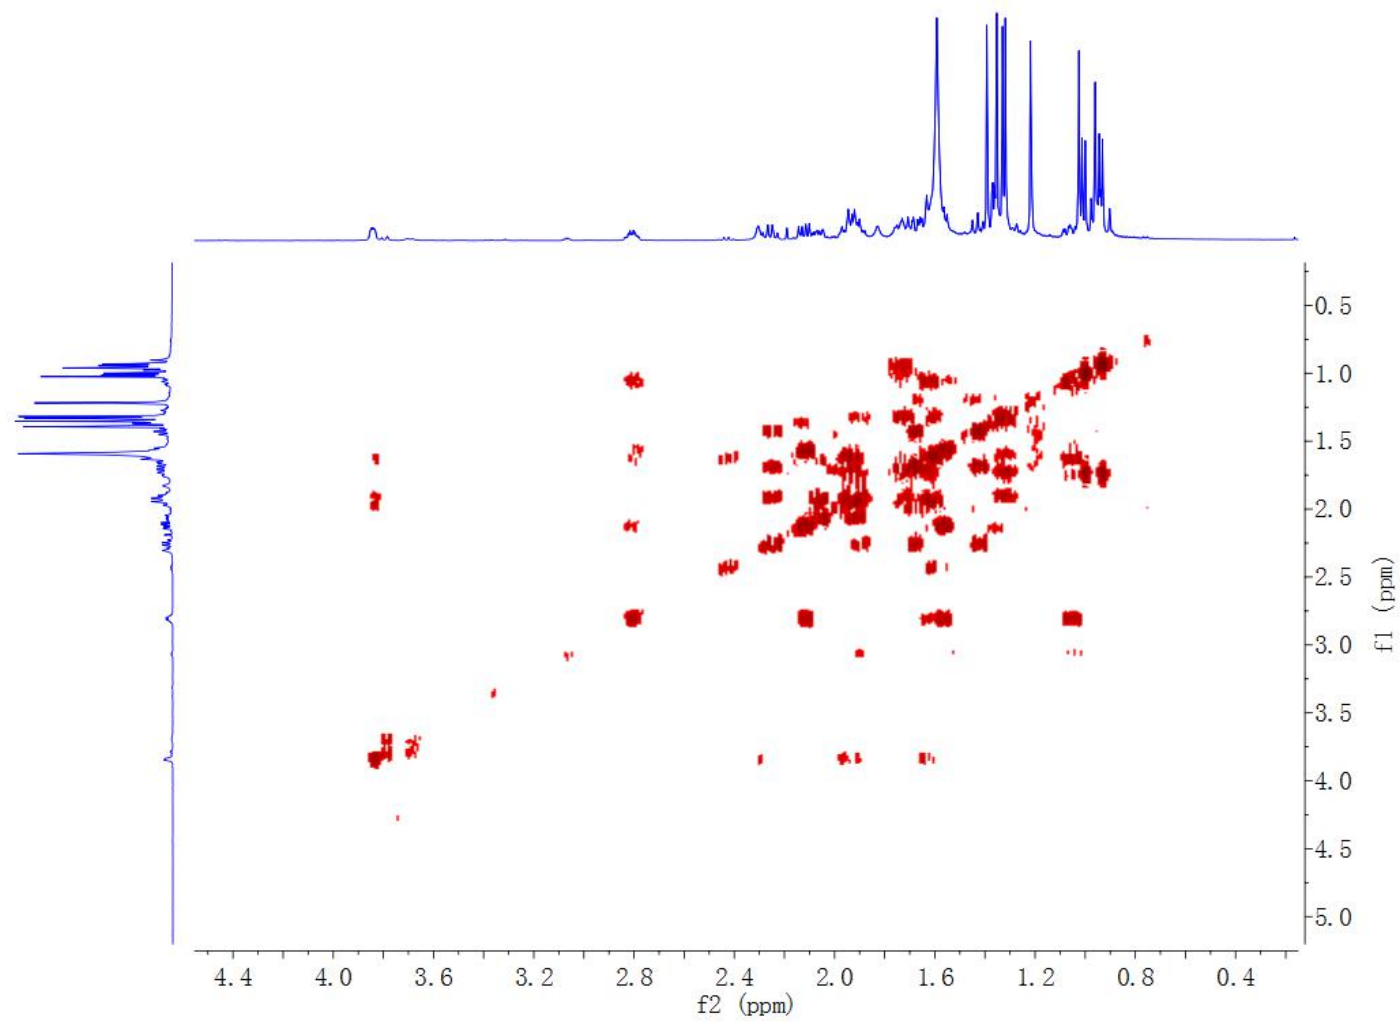

Figure S19.  $^1\text{H}$ - $^1\text{H}$  COSY spectrum (500 MHz,  $\text{CDCl}_3$ ) of **2**.

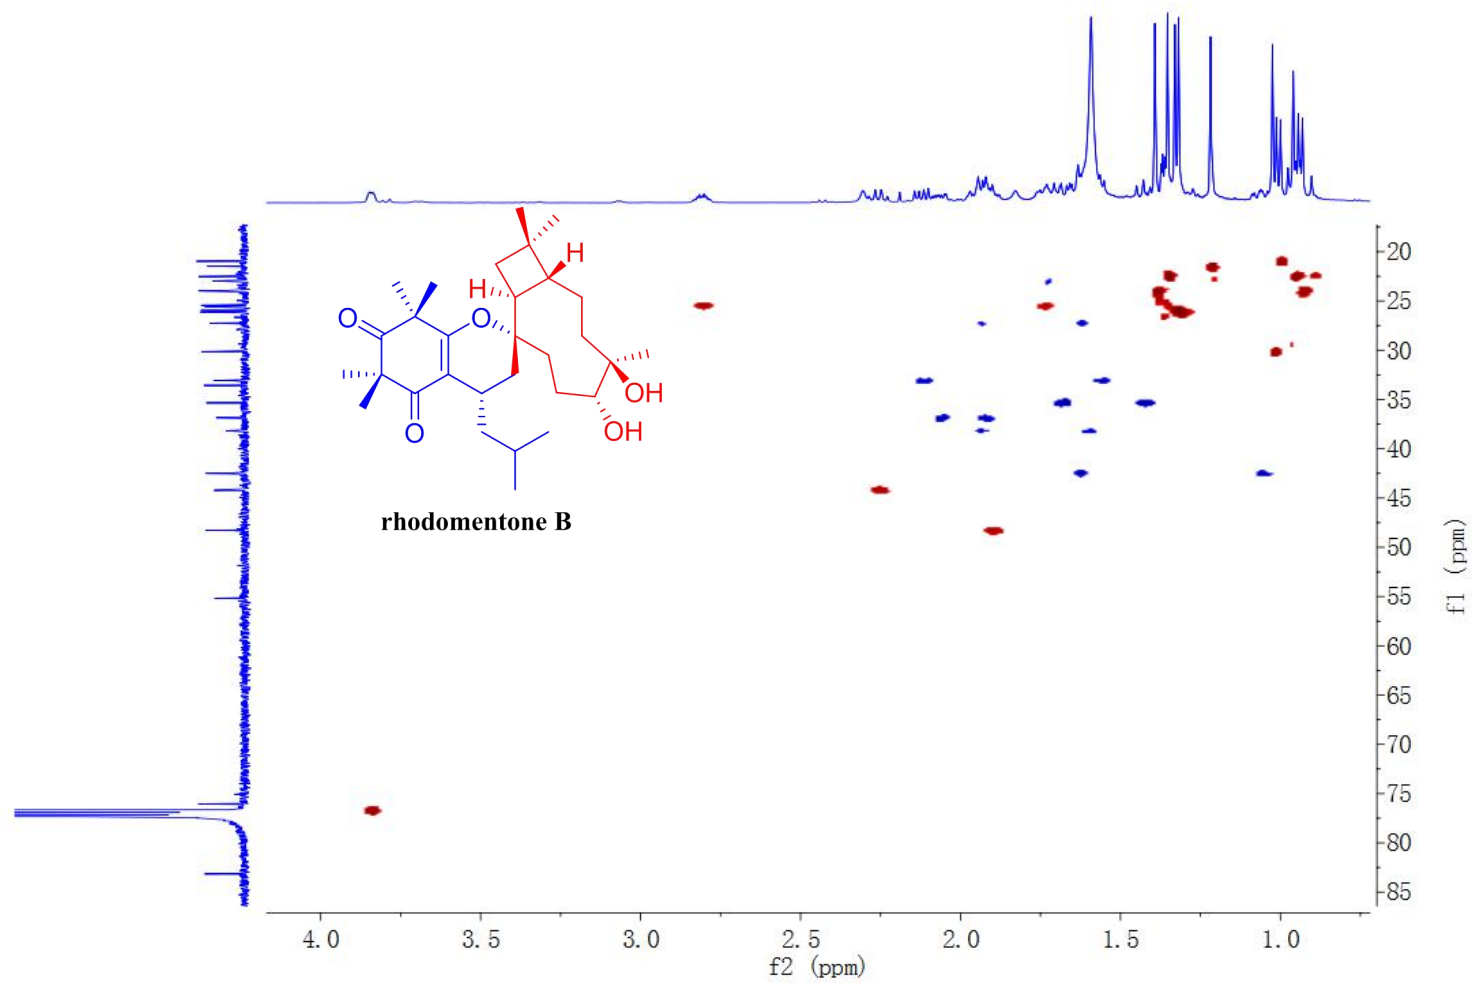

Figure S20. HSQC spectrum of **2**.

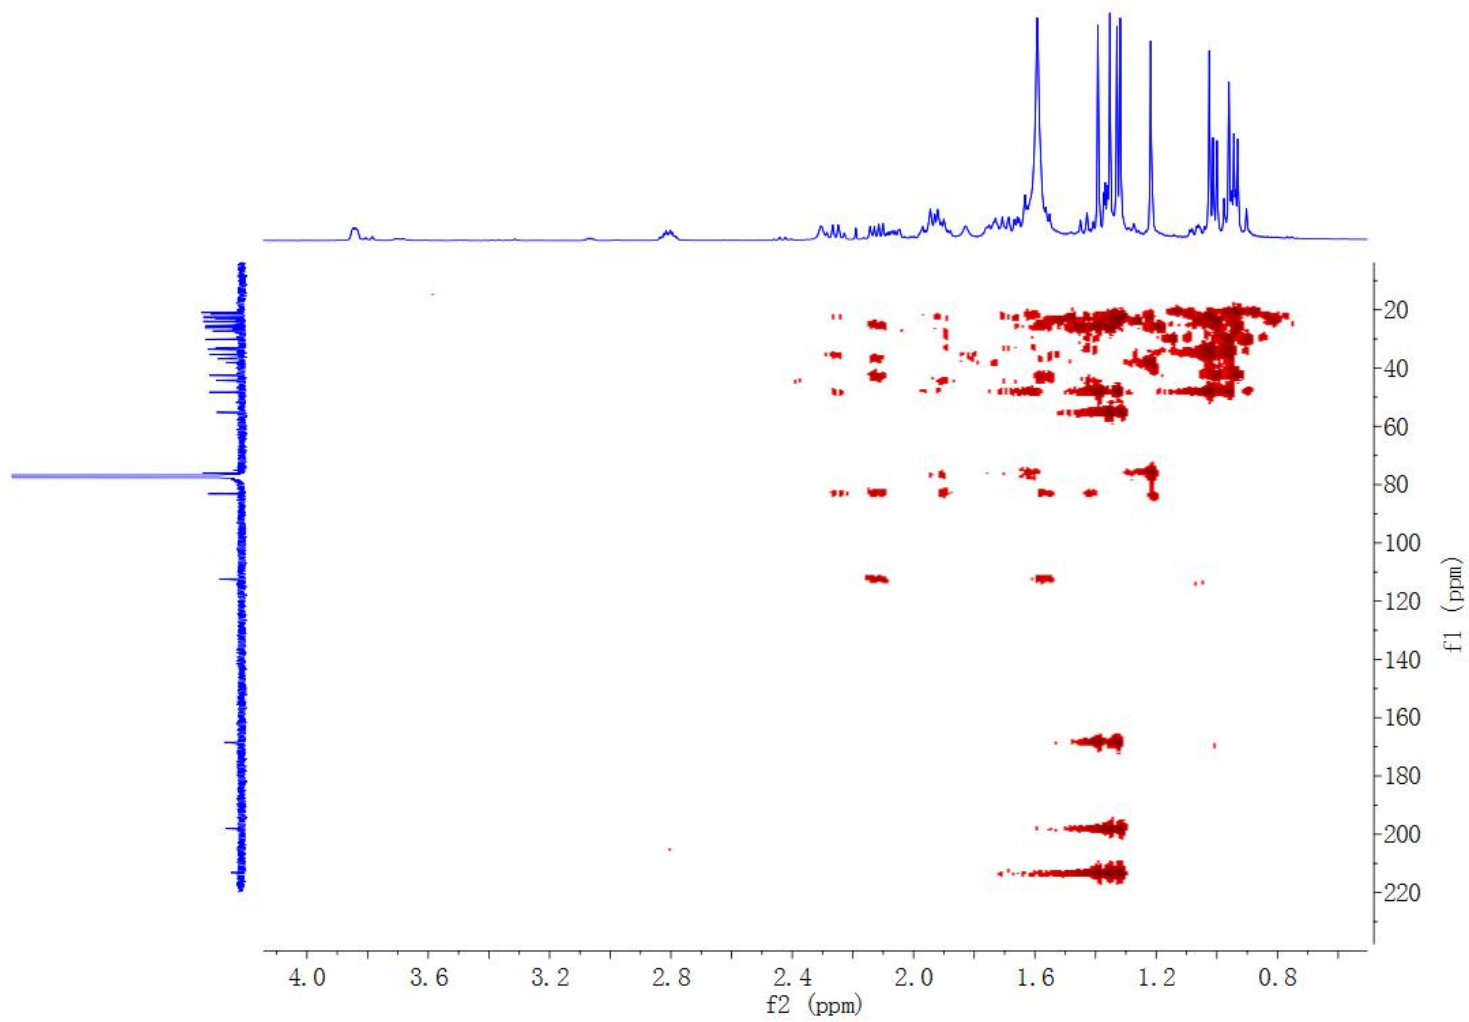

Figure S21. HMBC spectrum of **2**.

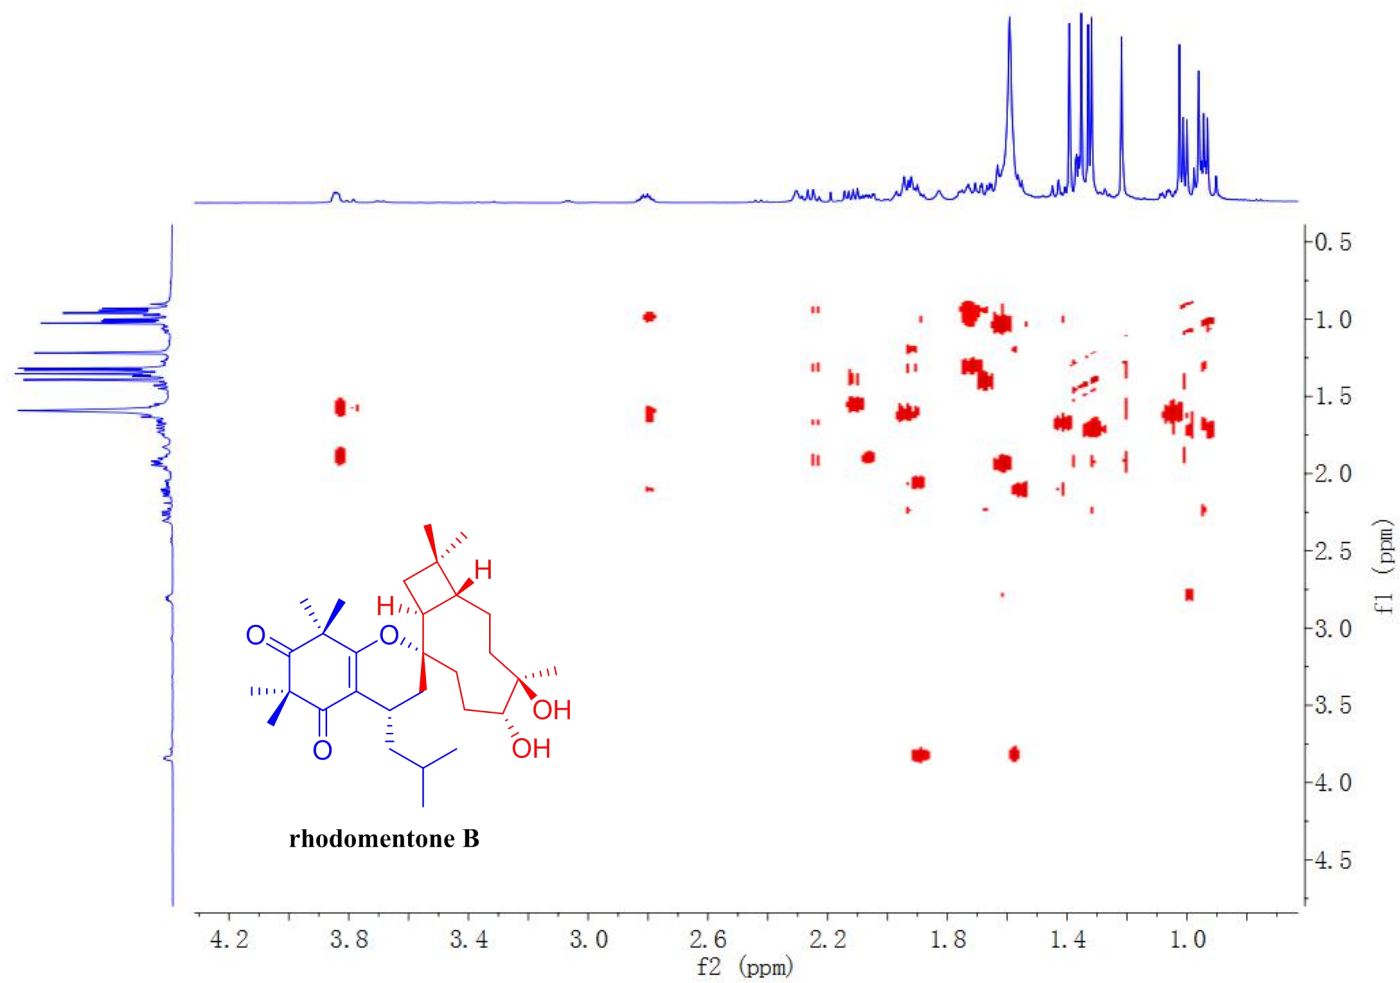

Figure S22. NOESY spectrum of **2**.



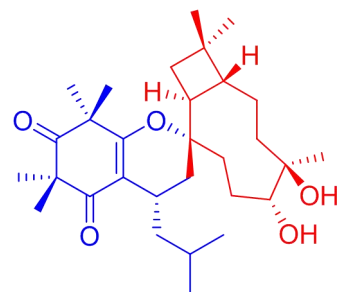

rhodomentone B

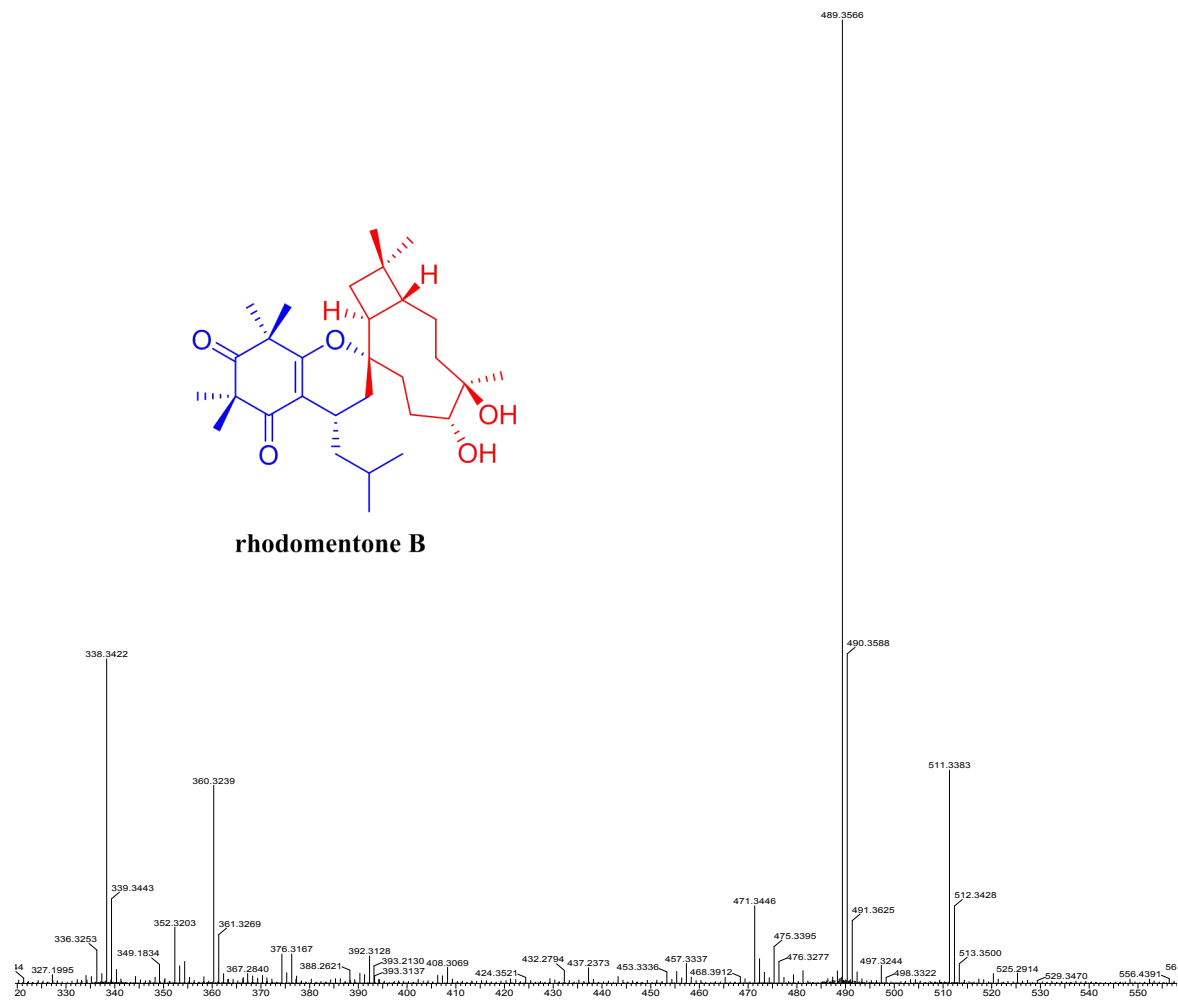

Figure S23. HRESIMS spectrum of 2.

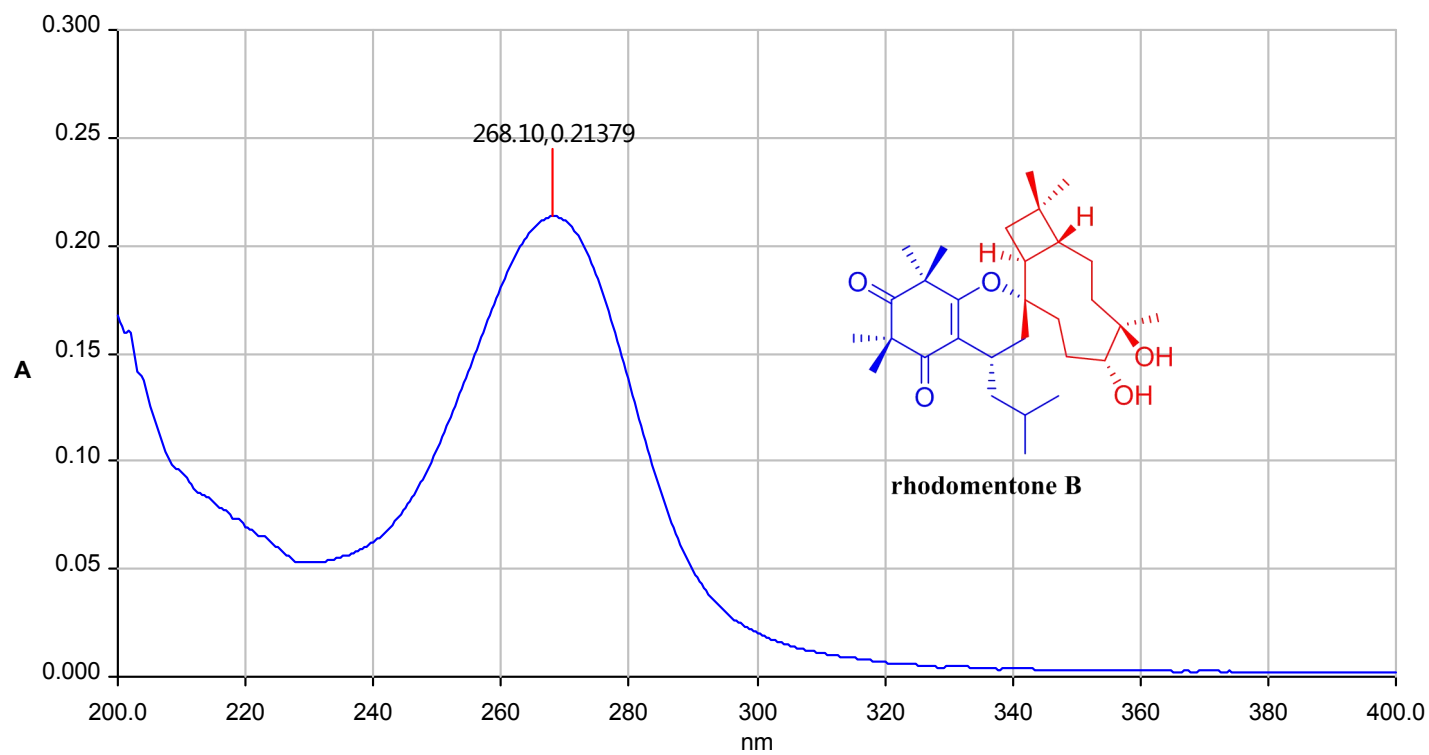

Figure S24. UV spectrum of **2**.

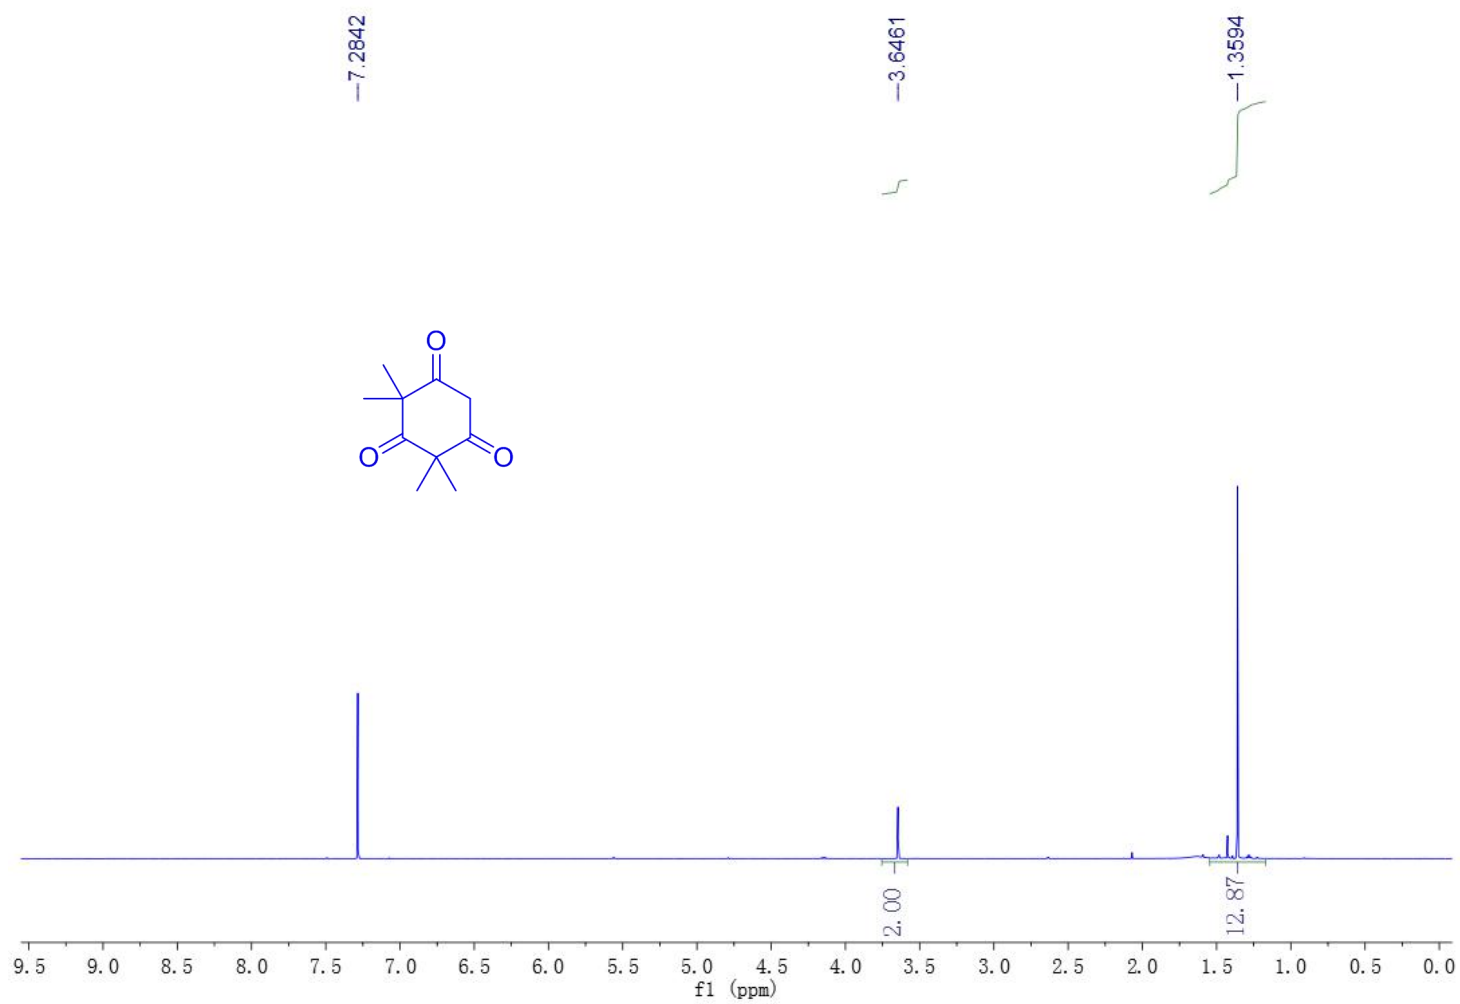

Figure S25. <sup>1</sup>H NMR spectrum (500 MHz, CDCl<sub>3</sub>) of key intermediate 4.

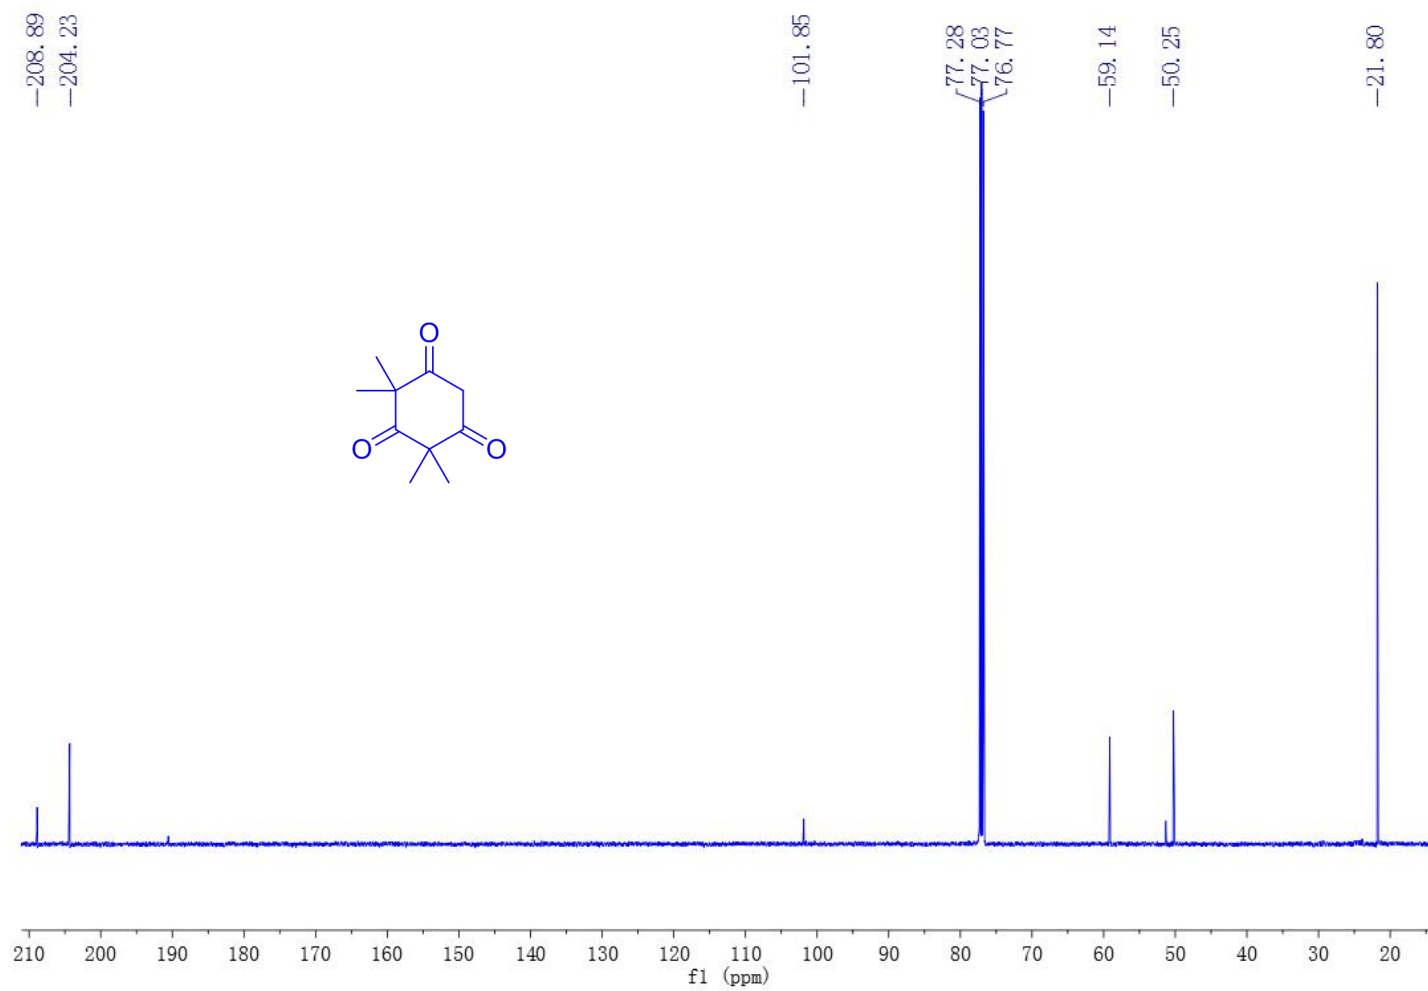

Figure S26. <sup>13</sup>C NMR spectrum (125 MHz, CDCl<sub>3</sub>) of key intermediate **4**.

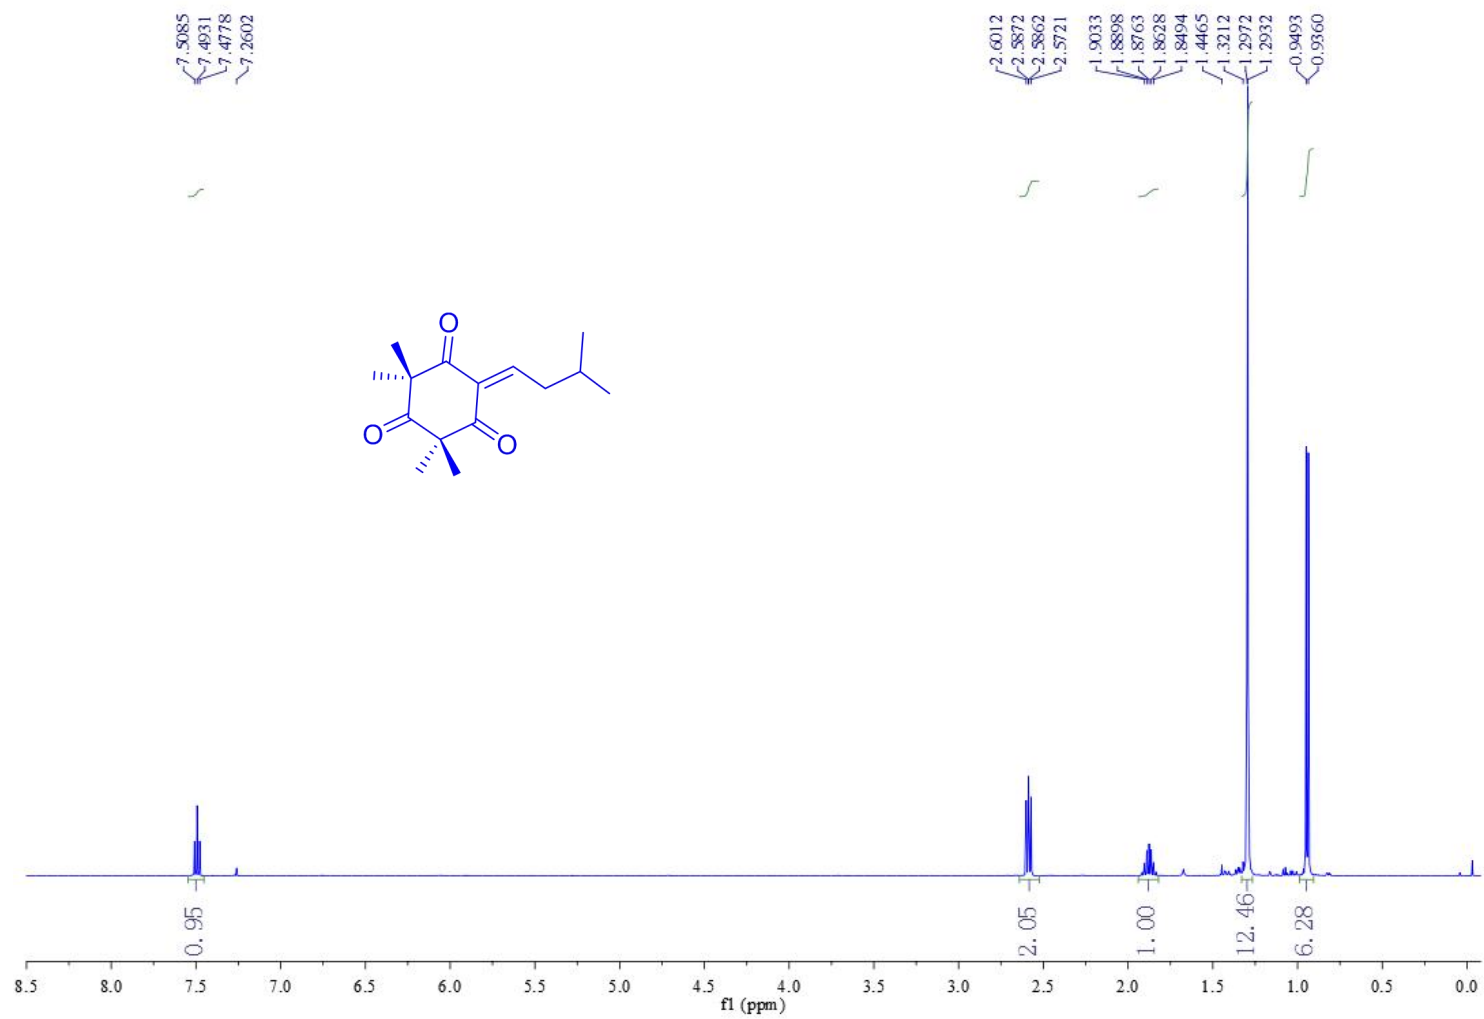

Figure S27. <sup>1</sup>H NMR spectrum (500 MHz, CDCl<sub>3</sub>) of key intermediate **i**.

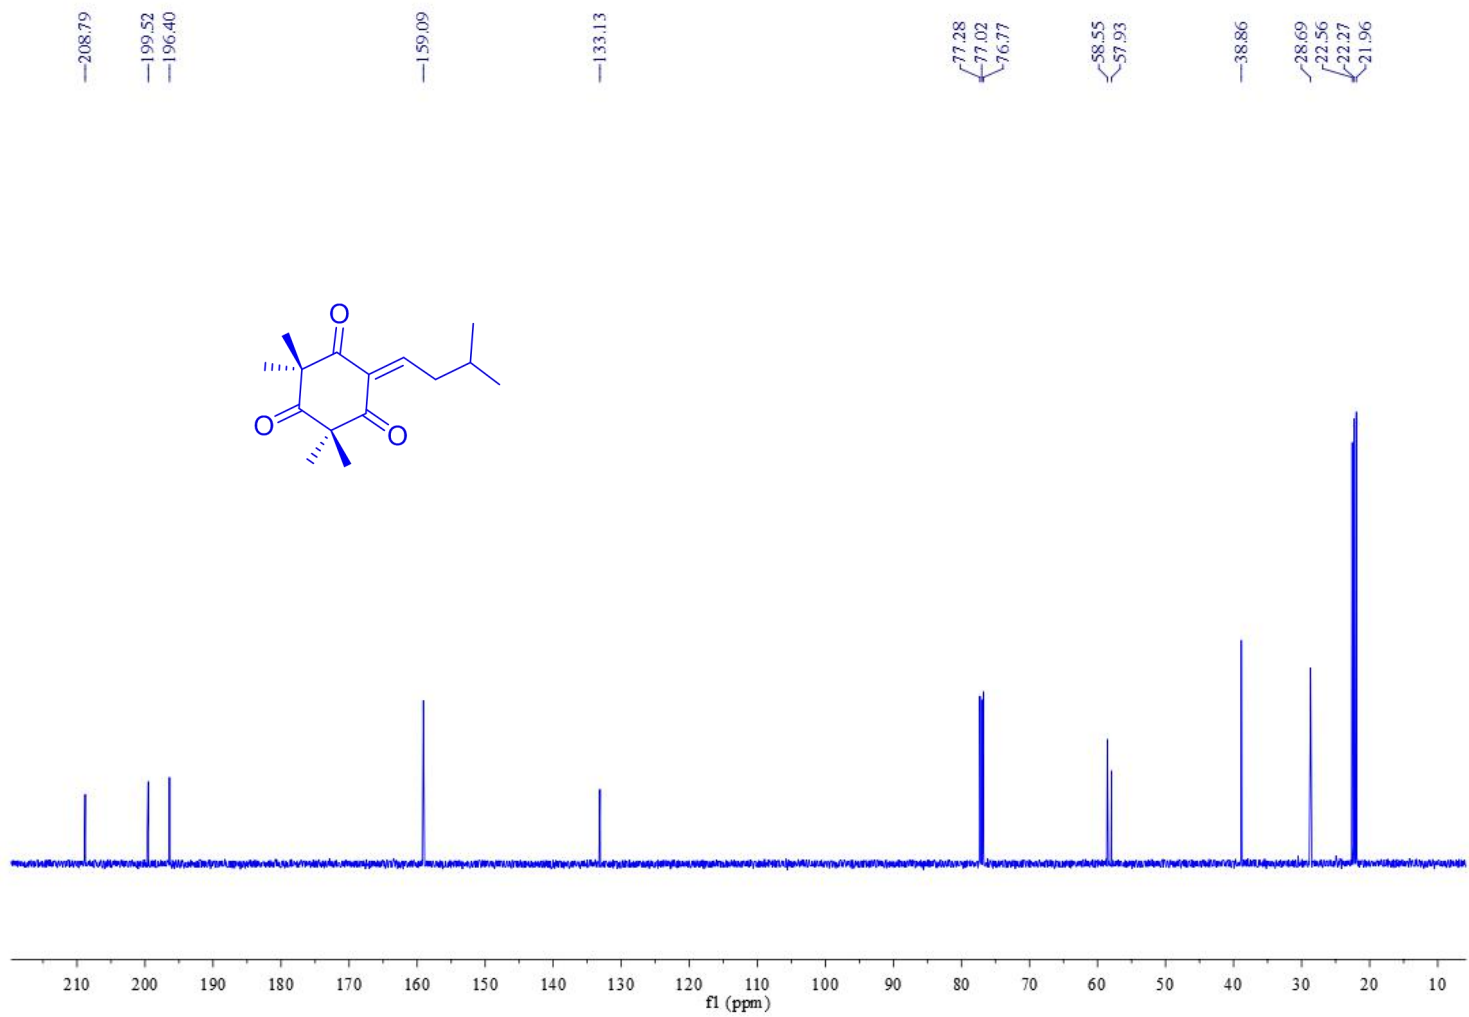

Figure S28. <sup>13</sup>C NMR spectrum (125 MHz, CDCl<sub>3</sub>) of key intermediate **i**.

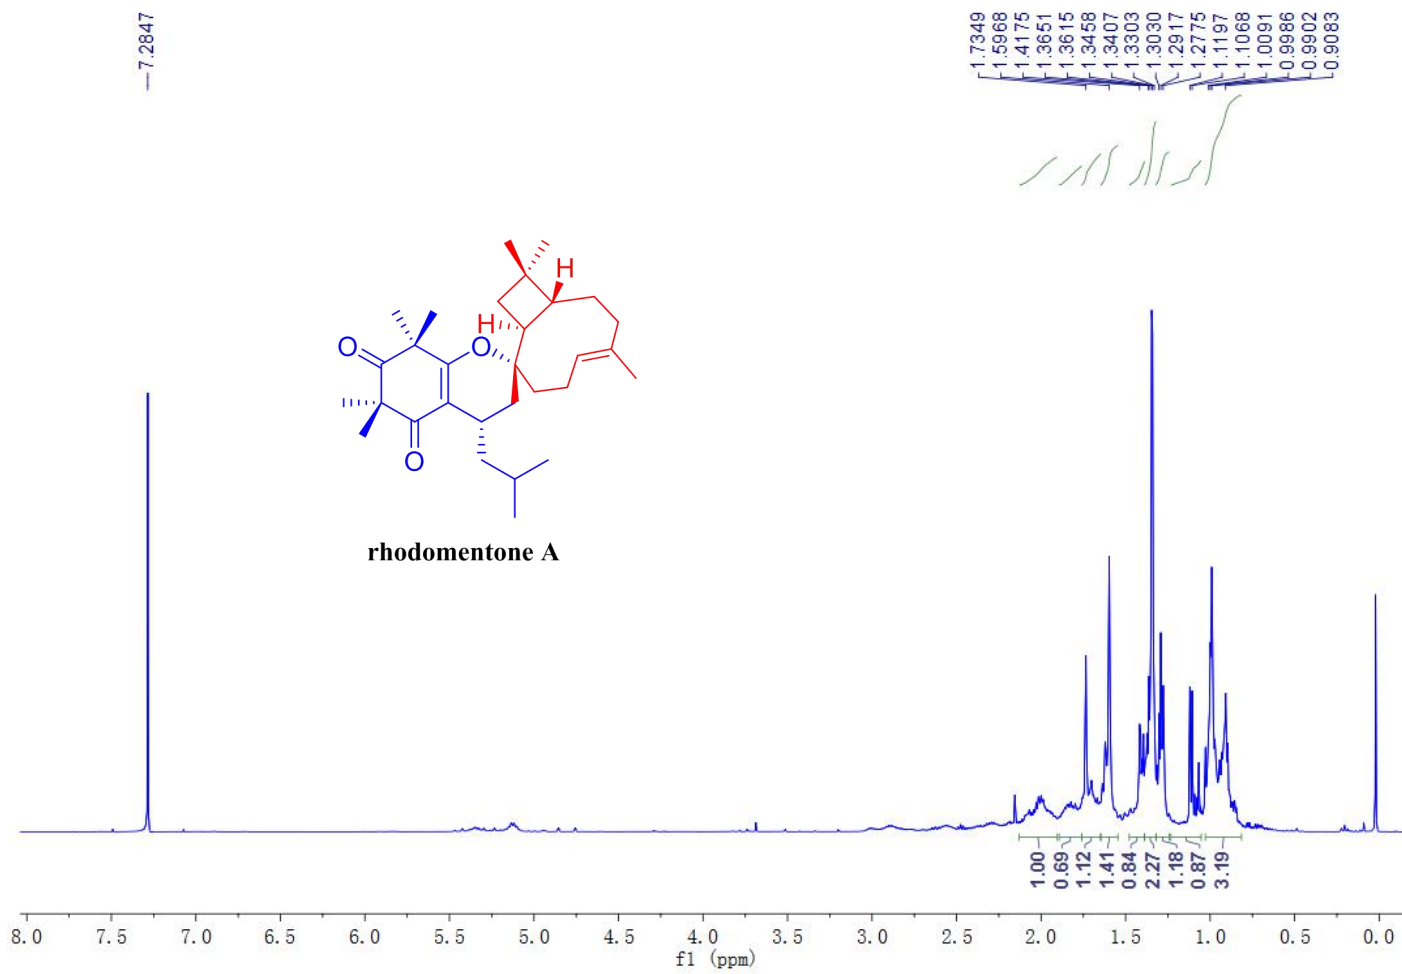

Figure S29.  $^1\text{H}$  NMR spectrum (500 MHz,  $\text{CDCl}_3$ ) of synthetic compound **1**.

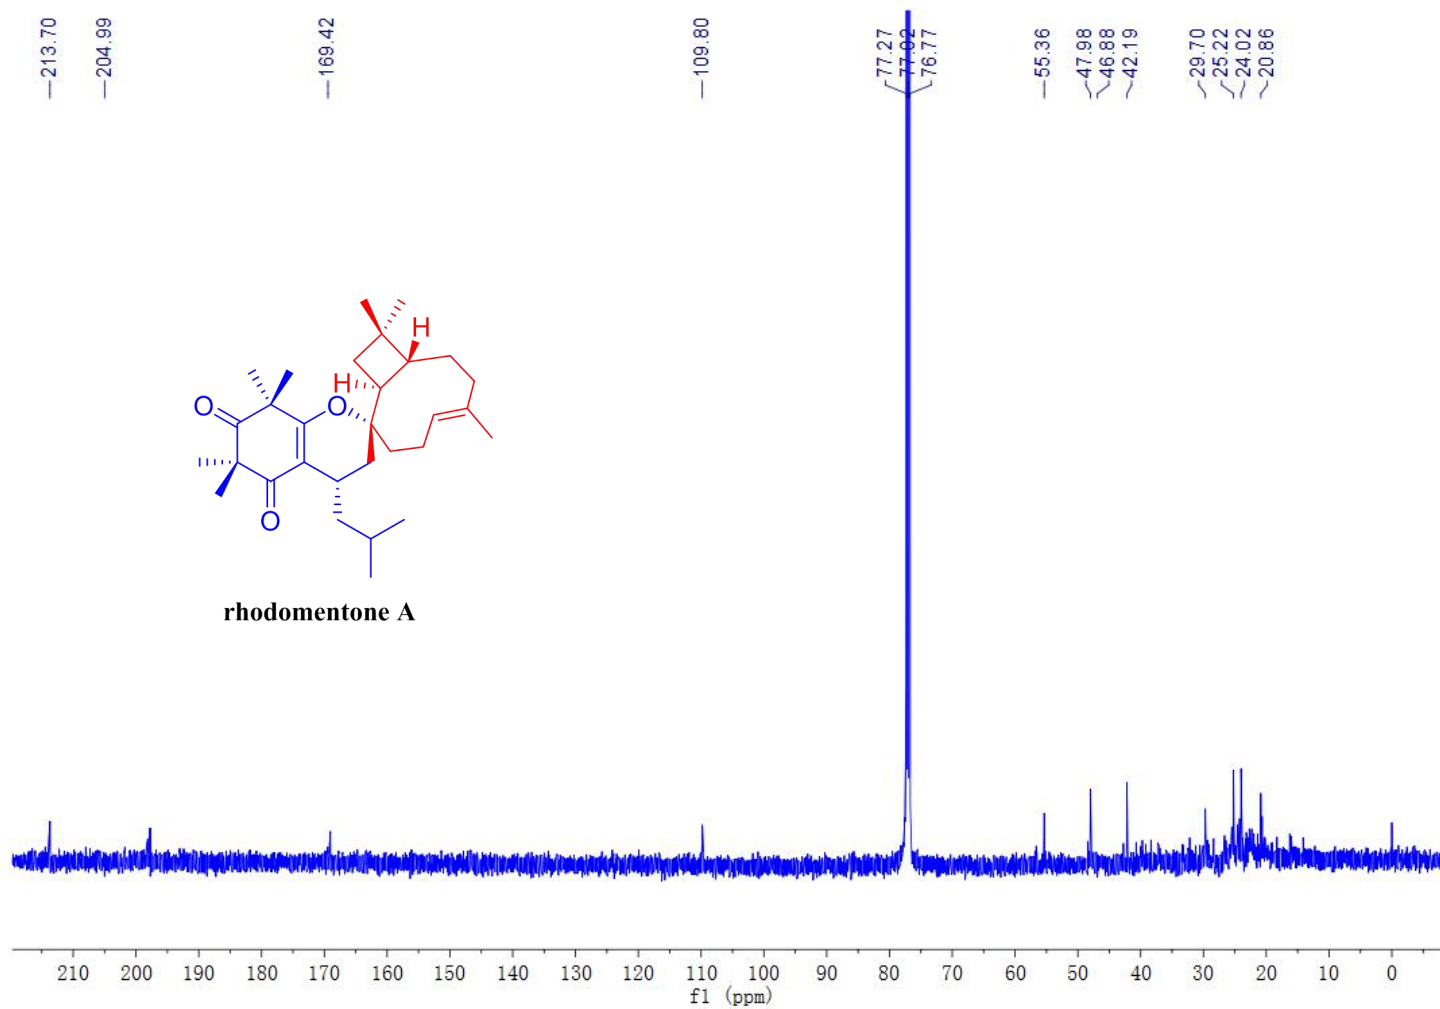

Figure S30. <sup>13</sup>C NMR spectrum (125 MHz, CDCl<sub>3</sub>) of synthetic compound **1**.



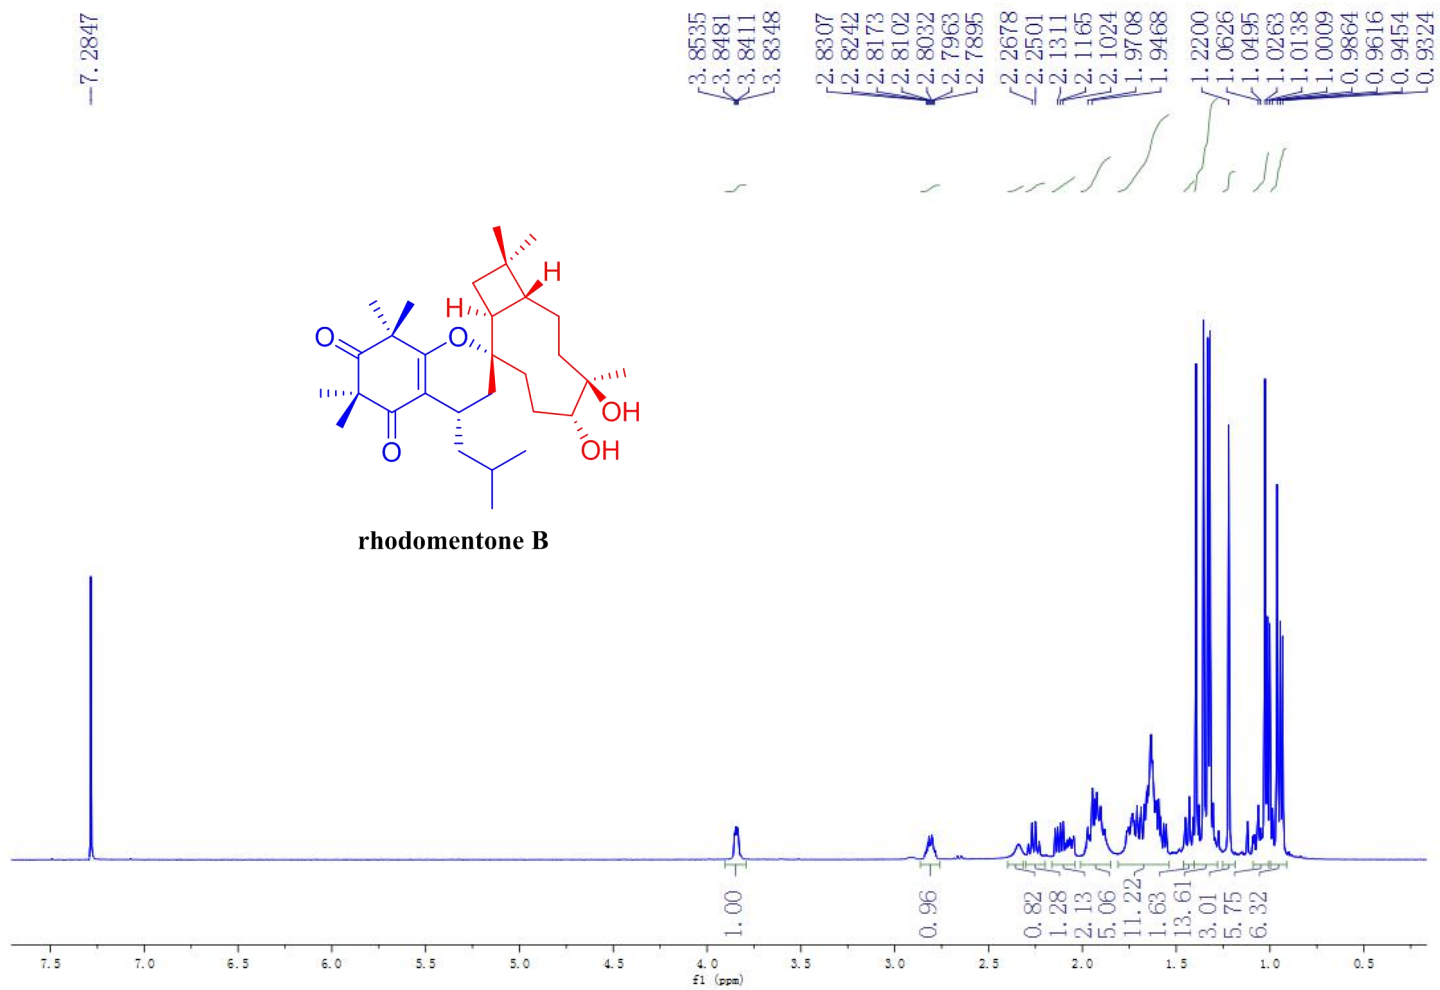

Figure S31. <sup>1</sup>H NMR spectrum (500 MHz, CDCl<sub>3</sub>) of synthetic compound **2**.

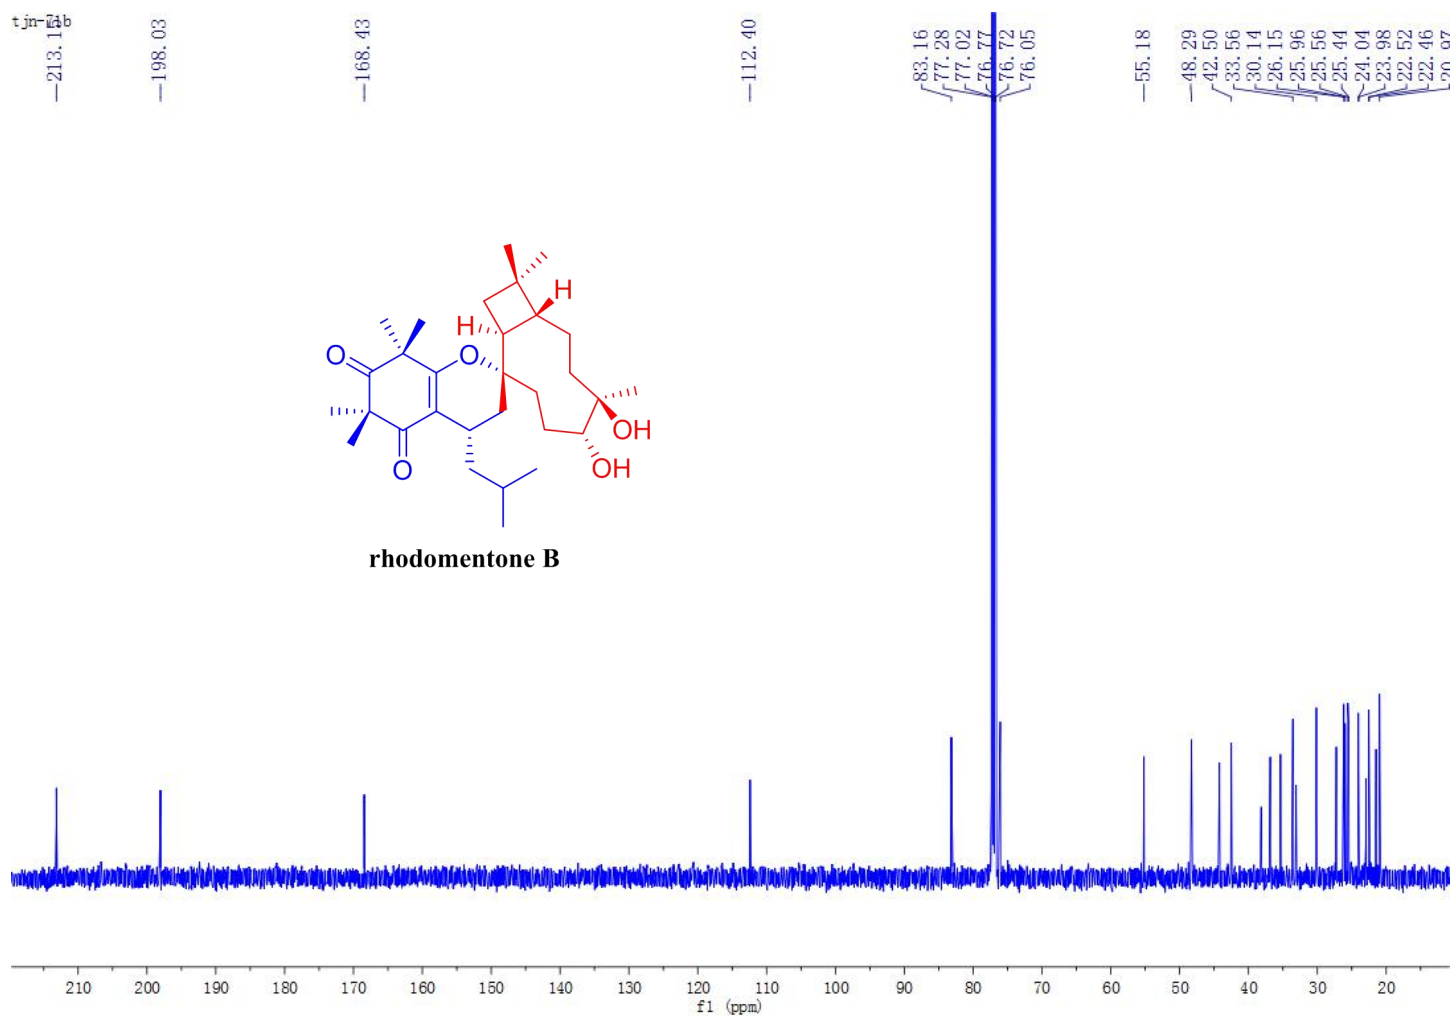

Figure S32. <sup>13</sup>C NMR spectrum (125 MHz, CDCl<sub>3</sub>) of synthetic compound 2.
